# Supplementary material for: Highly Iterated Palindromic Sequences (HIPs) and Their Relationship to DNA Methyltransferases
Source: Life (Basel). 2015 Mar 17;5(1):921–48. doi: 10.3390/life5010921 (PMC4390886; doi:10.3390/life5010921)
Supplement: Supplementary file 1 [file life-05-00921-s001.zip]

Archive with 5 entries (5 files):
- Suppl-Table-S4-Data-for-Fig-5-150213.xlsx
- HIP-Suppl-Figures.pdf
- Suppl-Table-S1-cb-data-150130.xlsx
- Suppl-Table-S2-Data-for-Fig2-and-FigS1-150212.xlsx
- Suppl-Table-S3-most-frequent-oligomers.xlsx
