# Supplementary material for: Highly Iterated Palindromic Sequences (HIPs) and Their Relationship to DNA Methyltransferases
Source: Life (Basel). 2015 Mar 17;5(1):921–48. doi: 10.3390/life5010921 (PMC4390886; doi:10.3390/life5010921)
Supplement: Supplementary file 1 [file life-05-00921-s001.zip › Suppl-Table-S1-cb-data-150130.xlsx]

## Sheet: Legend
Supplemental Table S1 - Genomes used in study
LEGEND
Column		Explanation
A	Organism	Name of organism
B	Phylogeny	Group per Shih et al (2013) PNAS 110:1053-1058 (my additions marked with x or y)
C	Subsection	Meanings per Rippka, source mostly Shih et al (2013)
D	Abbreviation	Abbreviated name of organism, used in Figure 1
E	BioBIKE nickname	Abbreviated name of organism, used by BioBIKE
F	Complete?	Genome fully sequenced?
G	Genes called?	If no, then only DNA sequence available
H	Size	Nucleotides (includes plasmids)
I	GC%	Fraction of G+C in genome (including plasmids)
J	Contigs	Number of replicons (if complete) or contiguous sequences (if incomplete)
K	Genes	Number of genes (highlighted = unannotated)
L	Bad regions	Regions in genomes with unspecified nucleotides
M	Bad nt	Total nucleotides unspecified
N	Avg gene	Average number of nucleotides in a gene
O	Avg IG	Average size in nucleotides of intergenic regions
P	Genes/kb	Number of genes per kb of sequence
X	Sort table by Organisms to put organisms in alphabetical order
Y	Sort table by phylogeny to put organisms in order of Shih et al's tree

## Sheet: cb-gene-data
Organism	phylogeny (Shih)	Subsection	Abbreviation	BioBIKE nickname	Compleyese?	Genes called?	Size	GC%	Contigs	Genes	Bad regions	Bad nt	Avg gene size	Avg IG	Genes/Kb
Acaryochloris marina MBIC11017	E-21	I	Amar11017	Amar	yes	yes	8361599	0.469559	10	8462	10	20	825	163	1.01
Anabaena 90	B1-112121x	IV	Ana90	ana90	yes	yes	5305675	0.380965	5	4570	0	0	933	228	0.86
Anabaena cylindrica PCC 7122	B1-1121211211	IV	Acy7122	Anacy	yes	yes	7063285	0.387906	7	5914	0	0	960	234	0.84
Anabaena PCC 7108	B1-1121211212	IV	Ana7108	ana7108	no	yes	5886741	0.387742	3	4805	11	22	941	284	0.82
Anabaena PCC 7120	B1-11211121	IV	Ana7120	A7120	yes	yes	7211789	0.412683	7	6218	0	0	957	203	0.86
Anabaena variabilis ATCC 29413	B1-11211122	IV	Avar29413	A29413	yes	yes	7105752	0.414098	5	5767	0	0	1015	217	0.81
Arthrospira platensis NIES-39	A-112212	III	Apla39	Apla39	yes	yes	6788435	0.436504	1	6676	18	95570	828	188	0.98
Calothrix PCC 6303	B1-11122	IV	Cal6303	cal6303	yes	yes	6960392	0.397969	4	5591	0	0	989	256	0.8
Calothrix PCC 7103	B1-11121	IV	Cal7103	cal7103	no	yes	11584393	0.385345	12	8829	68	136	953	359	0.76
Calothrix PCC 7507	B1-11212211	IV	Cal7507	cal7507	yes	yes	7023215	0.422472	1	6034	0	0	928	236	0.86
Candidatus atelocyanobacterium thalassa	B2-2111111	I-symbiont	UCYN-a	ucyn-a	yes	yes	1443806	0.311168	1	1241	0	0	948	216	0.86
Chamaesiphon minutus PCC 6605	B4-2	I	Cha6605	Cha6605	yes	yes	6761765	0.456701	3	6026	3	6	899	223	0.89
Chlorogloeopsis fritschii PCC 6912	B1-12x	V	Cfri6912	Cfritschii	no	no	7706876	0.414717	160	-	0	0	-	-	-
Chroococcidiopsis thermalis PCC 7203	B1-222	II	Cthe7203	Chro7203	yes	yes	6689401	0.444747	3	5810	0	0	956	195	0.87
Crinalium epipsammum PCC 9333	B4-1	III	Cri9333	cri9333	yes	yes	5620407	0.401626	9	4809	0	0	953	216	0.86
Crocosphaera watsonii WH8501	B2-211111222	I	Cwat8501	Cwat	no	yes	6220104	0.370982	315	6793	137	274	742	173	1.09
Cyanobacterium aponinum PCC 10605	B2-221222	I	Capo10605	cyan10605	yes	yes	4176973	0.349314	2	3486	0	0	966	232	0.83
Cyanobacterium stanieri PCC 7202	B2-22121	I	Csta7202	cyast	yes	yes	3163381	0.386647	1	2892	0	0	946	148	0.91
Cyanobium gracile PCC 6307	C1-22221	I	Cgra6307	cyagr	yes	yes	3342364	0.687072	1	3334	0	0	900	102	1
Cyanothece ATCC 51142	B2-211111212x	I	Cya51142	cyt	yes	yes	5460377	0.379419	6	5359	0	0	887	132	0.98
Cyanothece CCY0110	B2-211111211	I	Cya0110	ctc	no	yes	5880532	0.366935	163	6520	0	0	777	125	1.11
Cyanothece PCC 7424	B2-2112222	I	Cya7424	cyan7424	yes	yes	6554169	0.385098	7	5767	0	0	927	210	0.88
Cyanothece PCC 7425	E-12	I	Cya7425	cyan7425	yes	yes	5786110	0.506484	4	5384	0	0	918	156	0.93
Cyanothece PCC 7822	B2-2112221	I	Cya7822	cyan7822	yes	yes	7841948	0.398958	7	6702	0	0	970	200	0.85
Cyanothece PCC 8802	B2-2111121	I	Cya8802	cyan8802	yes	yes	4803347	0.398179	5	4496	5	10	910	158	0.94
Cyanothece PCC 8801	B2-2111122	I	Cya8801	cyr	no	yes	4575961	0.397098	29	4409	0	0	890	148	0.96
Cylindrospermopsis raciborskii CS-505	B1-11212112212	IV	Cyl505	craci	no	yes	3879030	0.402342	93	3500	3	6	944	164	0.9
Cylindrospermum stagnale PCC 7417	B1-11212111	IV	Cyl7417	cylst	yes	yes	7610589	0.422016	4	6325	5	10	964	239	0.83
Dactylococcopsis salina PCC 8305	B2-111	I	Dsal8305	dacsa	yes	yes	3781008	0.424384	1	3427	0	0	895	209	0.91
Epithemia turgida etsb endosymbiont	B2-21111x	I-organelle	ETSB	ETSB	yes	yes	2794318	0.334135	1	1993	0	0	843.692	617.007	0.713233
Fischerella thermalis PCC 7521	B1-12y	V	Fthe7521	fther7521	no	no	5437663	0.410156	140	-	1	2	-	-	-
Geitlerinema PCC 7407	D-1	III	Gei7407	gei7407	yes	yes	4681111	0.584631	1	3873	0	0	1016	193	0.83
Geminocystis herdmanii PCC 6308	B2-221221	I	Gher6308	syn6308	yes	yes	4263418	0.537075	1	3691	10	1000	877	278	0.87
Gloeobacter kilaueensis JS1	H-1x	I	GkilJS1	gkil	yes	yes	4724791	0.605368	1	4562	0	0	938	97	0.97
Gloeobacter violaceus PCC 7421	H-1	I	Gvio7421	Gvi	yes	yes	4659019	0.619979	1	4481	0	0	932	108	0.96
Gloeocapsa PCC 7428	B1-221	I	Glo7428	glo7428	yes	yes	5431448	0.432694	1	4735	0	0	955	192	0.87
Halothece PCC 7418	B2-112	I	Hal7418	halo7418	yes	yes	4179170	0.429225	1	3766	0	0	948	161	0.9
Leptolyngbya Heron Island J	C3-1x	III	LepHIJ	leptohij	no	yes	8064168	0.480491	119	7281	4	4	933.543	221.096	0.902883
Leptolyngbya PCC 6406	C3-1	III	Lep6406	lepto6406	no	yes	5776957	0.551053	3	4352	87	7728	925.243	491.516	0.753338
Leptolyngbya PCC 7376	B2-22112	III	Lep7376	lepto7376	yes	yes	5125950	0.438674	1	4281	0	0	994	203	0.84
Lyngbya PCC 8106	A-1121	III	Lyn8106	lyn	no	yes	7037511	0.411069	110	6185	0	0	958	180	0.88
Mastigocladopsis repens PCC 10914	B1-11112	V	Mas10914	mast10914	no	no	5975932	0.435719	19	-	19	38	-	-	-
Microchaete PCC 7126	B1-11212212	IV	Mch7126	mch7126	no	no	5733954	0.422068	4	-	0	0	-	-	-
Microcoleus PCC 7113	B3-2	III	Mic7113	mic7113	yes	yes	7966510	0.462133	9	6529	0	0	1002	218	0.82
Microcystis aeruginosa NIES843	B2-2112211	I	Maer843	mae	yes	yes	5842795	0.423306	1	6364	0	0	749	169	1.09
Nodularia spumigena CCY9414	B1-1121212	IV	Nod9414	nod	no	yes	5316258	0.412658	204	4904	0	0	888	196	0.92
Nostoc azollae-0708	B1-1121211222	IV-symbiont	Nazo0708	aazo	yes	yes	5486145	0.383737	3	3710	0	0	772	707	0.68
Nostoc PCC 7107	B1-112112	IV	Nos7107	nos7107	yes	yes	6329823	0.403578	1	5329	0	0	967	221	0.84
Nostoc PCC 7524	B1-1121111	IV	Nos7524	nos7524	yes	yes	6718869	0.415311	3	5533	0	0	999	215	0.82
Nostoc punctiforme ATCC 29133	B1-1121222	IV	Npun29133	Npun	yes	yes	9059191	0.413545	6	7412	0	0	989	234	0.82
Oscillatoria acuminata PCC 6304	A-22	III	Osc6304	osc6304	yes	yes	7804270	0.476122	3	5892	0	0	1060	265	0.75
Oscillatoria nigro-viridis PCC 7112	A-1211	III	Osc7122	osc7112	yes	yes	8272254	0.457845	6	6441	0	0	998	286	0.78
Oscillatoria PCC 10802	A-21	III	Osc10802	osc10802	no	yes	8594406	0.539447	9	5873	246	24402	900.552	637.134	0.683351
Oscillatoriales cyanobacterium JSC-12	B4-1x	III	Osc12	osc12	yes	yes	5530491	0.474716	1	4836	20	2000	966	178	0.87
Paulinella chromatophora chromatophore	C1-2222x	I-organelle	Paul-c	Paul-C	yes	yes	1021616	0.379874	1	915	0	0	888.892	286.961	0.89564
Planktothrix rubescens niva-cya 407	A-1212x	III	Prub407	prube407	no	yes	5505111	0.386887	3	4130	109	107086	940.938	473.154	0.750212
Pleurocapsa PCC 7327	B2-21121	II	Ple7327	ple7327	yes	yes	4986817	0.451933	1	4324	0	0	941	213	0.87
Prochlorococcus marinus AS9601	C1-2111122111	I	Pmar9601	pmb	yes	yes	1669886	0.313215	1	1964	0	0	777	73	1.18
Prochlorococcus marinus MED4	C1-21111211	I	PmarMed4	PMED4	yes	yes	1657990	0.307992	1	1757	0	0	839	105	1.06
Prochlorococcus marinus MIT9211	C1-211121	I	Pmar9211	pmz	no	yes	1839003	0.396825	114	2168	0	0	766	82	1.18
Prochlorococcus marinus MIT9301	C1-2111122112	I	Pmar9301	pmg	yes	yes	1641879	0.313399	1	1949	0	0	771	72	1.19
Prochlorococcus marinus MIT9303	C1-21122	I	Pmar9303	pmf	yes	yes	2682675	0.500076	1	3049	0	0	751	129	1.14
Prochlorococcus marinus MIT9312	C1-21111222	I	Pmar9312	pmi	yes	yes	1709204	0.312105	1	1855	0	0	827	95	1.09
Prochlorococcus marinus MIT9313	C1-21121	I	Pmar9313	P9313	yes	yes	2410873	0.507398	1	2322	1	1	861	177	0.96
Prochlorococcus marinus MIT9515	C1-21111212	I	Pmar9515	pmc	yes	yes	1704176	0.307942	1	1948	0	0	780	95	1.14
Prochlorococcus marinus NATL1a	C1-2111112	I	PmarNATL1A	pme	yes	yes	1864731	0.349793	1	2236	0	0	730	103	1.2
Prochlorococcus marinus NATL2a	C1-2111111	I	PmarNATL2A	pmn	yes	yes	1842899	0.35123	1	1936	0	0	816	136	1.05
Prochlorococcus marinus SS120	C1-211122	I	Pmar120	PRO1375	yes	yes	1751080	0.364421	1	1928	0	0	811	97	1.1
Prochloron didemni P4-Papua New Guinea	B2-2212X	I-symbiont	PdidP4	pdidemnip	no	no	5686559	0.418982	690	-	20	40	-	-	-
Prochlorothrix hollandica PCC 9006	C22-1	III	Phol9006	pholl9006	no	yes	5646343	0.541926	13	3665	223	446	922	619	0.65
Pseudanabaena PCC 7367	F-2	III	Pse7367	pse7367	yes	yes	4885680	0.462239	2	3909	0	0	975	275	0.8
Raphidiopsis brookii d9	B1-11212112211	IV	RapD9	rbrookii	no	yes	3186511	0.400568	47	3057	2	4	895	147	0.96
Richelia intracellularis HH01	B1-12z	IV-symbiont	Rint01	rinthh	no	yes	3243759	0.337117	90	2320	4	8	780	618	0.72
Rivularia PCC 7116	B1-12	IV	Riv7116	riv7116	yes	yes	8728773	0.375316	3	6710	0	0	1021	280	0.77
Scytonema hofmanni UTEX 2349	B1-1121212y	IV	Shof2349	shofmannii	no	no	8133444	0.362232	15	-	158	316	-	-	-
Stanieria cyanosphaera PCC 7437	B2-2221	II	Sta7437	sta7437	yes	yes	5544990	0.524473	6	4833	0	0	944	203	0.87
Synechococcus BL107	C1-212121	I	Syn107	S107	yes	yes	2285034	0.54205	1	2571	5	1657	798	91	1.13
SynechocoCCus CC9311	C1-2122121	I	Syn9311	syg	yes	yes	2606748	0.342759	1	2944	0	0	776	109	1.13
SynechocoCCus CC9605	C1-2121121	I	Syn9605	S9605	yes	yes	2510659	0.541645	1	2748	0	0	807	107	1.09
SynechocoCCus CC9902	C1-212122	I	Syn9902	S9902	yes	yes	2234828	0.597981	1	2355	0	0	856	93	1.05
Synechococcus elongatus PCC 6301	C2-2	I	Syn6301	S6301	yes	yes	2696255	0.554843	1	2582	0	0	921	123	0.96
Synechococcus elongatus PCC 7942	C2-1	I	Syn7942	S7942	yes	yes	2750104	0.594126	3	2722	0	0	902	108	0.99
Synechococcus os type A prime	G-11	I	SynOSa	cya	yes	yes	2932766	0.602373	1	2896	0	0	887	126	0.99
Synechococcus os type B prime	G-12	I	SynOSb	cyb	yes	yes	3046682	0.584503	1	2914	0	0	897	149	0.96
Synechococcus PCC 7002	B2-22111	I	Syn7002	syp	yes	yes	3409935	0.49187	7	3235	0	0	925	129	0.95
Synechococcus PCC 7336	G-21	I	Syn7336	S7336	no	yes	5066637	0.575433	1	1938	7	700	893.905	2052.29	0.382502
Synechococcus RCC307	C1-1	I	Syn307	syr	yes	yes	2224914	0.608435	1	2583	1	1	818	43	1.16
Synechococcus RS9916	C1-212221	I	Syn9916	S9916	yes	yes	2664873	0.643252	1	3032	3	408	806	73	1.14
Synechococcus RS9917	C1-212222	I	Syn9917	S9917	yes	yes	2584918	0.411368	1	2846	8	5376	849	59	1.1
Synechococcus WH5701	C1-221	I	Syn5701	S5701	yes	yes	2860463	0.660416	1	3184	13	1721	818	80	1.11
Synechococcus WH7803	C1-2122112	I	Syn7803	syx	yes	yes	2366980	0.60236	1	2586	0	0	858	58	1.09
Synechococcus WH7805	C1-2122111	I	Syn7805	S7805	yes	yes	2621166	0.554378	1	2949	9	5277	818	71	1.13
Synechococcus WH8102	C1-212111	I	Syn8102	S8102	yes	yes	2434428	0.592176	1	2581	0	0	862	82	1.06
Synechocystis PCC 6803	B2-21112	I	Syn6803	S6803	yes	yes	3956956	0.473596	8	3722	0	0	928	135	0.94
Thermosynechococcus elongatus BP1	E-111	I	TsyBp1	TeBP1	yes	yes	2593857	0.539179	1	2525	0	0	927	101	0.97
Thermosynechococcus NK55a	E-112x	I	TsyNK55a	tsynnk55	yes	yes	2520064	0.538072	1	2277	1	100	944	163	0.9
Trichodesmium erythraeum IMS101	A-111	III	Tery101	ter	yes	yes	7750108	0.341434	1	4499	0	0	1035	687	0.58
