# Supplementary material for: Highly Iterated Palindromic Sequences (HIPs) and Their Relationship to DNA Methyltransferases
Source: Life (Basel). 2015 Mar 17;5(1):921–48. doi: 10.3390/life5010921 (PMC4390886; doi:10.3390/life5010921)
Supplement: Supplementary file 1 [file life-05-00921-s001.zip › Suppl-Table-S2-Data-for-Fig2-and-FigS1-150212.xlsx]

## Sheet: Legend
Supplemental Table S2 - Data for Figure 2 and Figure S1
Column		Explanation for Figure 2A tab (O/E ratios)
A	Organism	Name of organism (for abbreviation, see Supplemental Table 1)
B	Phylogeny (Shih)	Group per Shih et al (2013) PNAS 110:1053-1058 (my additions marked with x or y)
C	Phylogeny (ML)	Groups per Maximum Likelihood tree (Fig. 1); order used in figures
D	GC%	GC fraction of entire genome (including any plasmids)
E-H	[oligomer]	O/E ratio of given sequence, E calculated by mononucleotide frequencies
Column		Explanation for Figure 2B (frequencies)
A	Organism	Name of organism (for abbreviation, see Supplemental Table 1)
B	Phylogeny (Shih)	Group per Shih et al (2013) PNAS 110:1053-1058 (my additions marked with x or y)
C	Phylogeny (ML)	Groups per Maximum Likelihood tree (Fig. 1); order used in figures
D	GC%	GC fraction of entire genome (including any plasmids)
E-H	[oligomer]	Frequency of given sequence, counts per million nucleotides
Column		Explanation for Figure S1A tab (O/E per 1st order Markov)
A	Organism	Name of organism (for abbreviation, see Supplemental Table 1)
B	Phylogeny (Shih)	Group per Shih et al (2013) PNAS 110:1053-1058 (my additions marked with x or y)
C	Phylogeny (ML)	Groups per Maximum Likelihood tree (Fig. 1); order used in figures
D	GC%	GC fraction of entire genome (including any plasmids)
E-G	[oligomer]	O/E ratio of given sequence, E calculated from 1st order Markov
Column		Explanation for Figure S1B tab (O/E per 2nd order Markov)
A	Organism	Name of organism (for abbreviation, see Supplemental Table 1)
B	Phylogeny (Shih)	Group per Shih et al (2013) PNAS 110:1053-1058 (my additions marked with x or y)
C	Phylogeny (ML)	Groups per Maximum Likelihood tree (Fig. 1); order used in figures
D	GC%	GC fraction of entire genome (including any plasmids)
E-G	[oligomer]	O/E ratio of given sequence, E calculated from 2nd order Markov

## Sheet: Figure 2A-OE
Organism	Shih	ML	GC%	GCGATCGC	GGGATCCC	TCGATCGA	TTGATCAA
Trichodesmium erythraeum IMS101	A-111	P-111	0.341434	139.79	0.58	0.05	1.33
Lyngbya PCC 8106	A-1121	P-1121	0.411069	65.91	0.07	0.13	3.76
Arthrospira platensis NIES-39	A-112212	P-1122	0.436504	114.7	0.09	0.1	1.52
Oscillatoria nigro-viridis PCC 7112	A-1211	P-121	0.457845	59.54	0	11.69	0.4
Planktothrix rubescens niva-cya 407	A-1212x	P-122	0.386887	81.26	0.06	0.04	4.39
Oscillatoria acuminata PCC 6304	A-21	P-2	0.476122	103.63	0.55	0.14	0.58
Dactylococcopsis salina PCC 8305	B2-111	Q-1111111	0.424384	56.25	0.07	22.68	2.96
Halothece PCC 7418	B2-112	Q-1111112	0.429225	89.15	0.27	0.41	3.27
Microcystis aeruginosa NIES843	B2-2112211	Q-111112	0.423306	41.7	2.11	6.72	1.44
Pleurocapsa PCC 7327	B2-21121	Q-111121	0.451933	123.84	0.42	4.73	0.24
Cyanothece PCC 7822	B2-2112221	Q-1111221	0.398958	19.45	0	0.38	2.07
Cyanothece PCC 7424	B2-2112222	Q-1111222	0.385098	78.71	0.13	1.75	1.54
Epithemia turgida etsb endosymbiont	B2-21111x	Q-111211	0.334135	15.29	0.45	0.07	1.63
Candidatus atelocyanobacterium thalassa	B2-2111111	Q-1112121	0.311168	15.23	0.41	0.08	1.49
Cyanothece CCY0110	B2-211111211	Q-11121211	0.366935	125.19	0.13	0.01	2.28
Cyanothece ATCC 51142	B2-211111212x	Q-11121212	0.379419	105.64	0	0.18	2.35
Crocosphaera watsonii WH8501	B2-211111222	Q-11121222	0.370982	117.14	0.24	0.1	2.19
Cyanothece PCC 8802	B2-2111121	Q-111221	0.398179	112.39	0.04	0.18	3.59
Cyanothece PCC 8801	B2-2111122	Q-111222	0.397098	110.97	0.04	0.15	3.51
Stanieria cyanosphaera PCC 7437	B2-2221	Q-112	0.524473	227.86	0.15	0.34	1.22
Synechocystis PCC 6803	B2-21112	Q-121	0.473596	70.06	0.85	0.02	3.33
Synechococcus PCC 7002	B2-22111	Q-1221	0.49187	114.69	0.76	0.13	4.49
Leptolyngbya PCC 7376	B2-22112	Q-1222	0.438674	144.04	0.33	0.43	2.36
Prochloron didemni P4-Papua New Guinea	B2-2212X	Q-21	0.418982	68.63	0.52	0.27	0.39
Cyanobacterium stanieri PCC 7202	B2-22121	Q-2211	0.386647	132.89	0.97	0	2.92
Geminocystis herdmanii PCC 6308	B2-221221	Q-2212	0.537075	44.25	0.17	69.95	2.03
Cyanobacterium aponinum PCC 10605	B2-221222	Q-222	0.349314	177.12	0.08	2.23	1.76
Oscillatoria PCC 10802	A-22	R-11	0.539447	4.96	0.02	0.41	0.45
Mastigocladopsis repens PCC 10914	B1-11112	R-1211	0.435719	55.44	0.04	0.08	0.87
Calothrix PCC 7103	B1-11121	R-1212111	0.385345	2.91	0.04	0.08	0.45
Calothrix PCC 6303	B1-11122	R-1212112	0.397969	121.82	0.38	0.78	1.47
Chlorogloeopsis fritschii PCC 6912	B1-12x	R-12121211	0.414717	134.01	0.04	0.32	0.65
Fischerella thermalis PCC 7521	B1-12y	R-12121212	0.410156	137.36	0.11	0.05	1.82
Rivularia PCC 7116	B1-12	R-12121221	0.375316	60.15	0.03	0.23	0.2
Richelia intracellularis HH01	B1-12z	R-12121222	0.337117	3.67	0.73	0	0.94
Nostoc PCC 7524	B1-1121111	R-121221111111	0.415311	122.11	0.04	0.02	1.99
Anabaena PCC 7120	B1-11211121	R-12122111111211	0.412683	118.64	0.02	0.01	1.48
Anabaena variabilis ATCC 29413	B1-11211122	R-12122111111212	0.414098	118.91	0.02	0.06	1.52
Nostoc PCC 7107	B1-112112	R-1212211111122	0.403578	152.85	0.05	0.05	1.74
Microchaete PCC 7126	B1-11212212	R-12122111112	0.422068	120.73	0.09	0.08	1.96
Nostoc punctiforme ATCC 29133	B1-1121222	R-1212211112	0.413545	123.99	0.03	0.43	0.62
Cylindrospermum stagnale PCC 7417	B1-11212111	R-121221112	0.422016	93.34	0	0.07	1.9
Anabaena PCC 7108	B1-1121211212	R-12122112	0.387742	90.21	0	0.03	1.84
Nodularia spumigena CCY9414	B1-1121212	R-1212212111	0.412658	112.17	0	0	1.78
Scytonema hofmanni UTEX 2349	B1-1121212y	R-1212212112	0.362232	152.64	0	0.05	0.98
Anabaena 90	B1-112121x	R-121221212	0.380965	84.19	0.04	0.02	2.06
Calothrix PCC 7507	B1-11212211	R-12122122	0.422472	124.09	0	0.17	1.71
Anabaena cylindrica PCC 7122	B1-1121211211	R-1212221	0.387906	105.46	0	0.05	1.75
Raphidiopsis brookii d9	B1-11212112211	R-121222211	0.400568	73.72	1.89	0	1.18
Cylindrospermopsis raciborskii CS-505	B1-11212112212	R-121222212	0.402342	81.49	1.87	0.06	1.01
Nostoc azollae-0708	B1-1121211222	R-12122222	0.383737	42.98	0.31	0.07	1.89
Gloeocapsa PCC 7428	B1-221	R-12211	0.432694	164.84	0	1.16	0.74
Chroococcidiopsis thermalis PCC 7203	B1-222	R-12212	0.444747	161.29	0.11	3.09	0.25
Microcoleus PCC 7113	B3-2	R-1222	0.462133	65.51	0.01	0.39	1.56
Crinalium epipsammum PCC 9333	B4-1	R-211	0.401626	154.37	0	0.04	2.04
Oscillatoriales cyanobacterium JSC-12	B4-1x	R-212	0.474716	98.61	0.15	0.34	3.05
Chamaesiphon minutus PCC 6605	B4-2	R-22	0.456701	42.8	0	50.62	0.12
Prochlorococcus marinus NATL2a	C1-2111111	S-1111111111	0.35123	0.7	1.23	0.52	3.5
Prochlorococcus marinus NATL1a	C1-2111112	S-1111111112	0.349793	0.53	0.89	0.62	3.62
Prochlorococcus marinus SS120	C1-211122	S-111111112111	0.364421	0.46	0.93	0.3	2.82
Prochlorococcus marinus MED4	C1-21111211	S-111111112112	0.307992	0.38	2.64	0.22	2.45
Prochlorococcus marinus MIT9515	C1-21111212	S-11111111212	0.307942	0.74	2.94	0.58	2.47
Prochlorococcus marinus AS9601	C1-2111122111	S-11111111221	0.313215	0.69	1.72	0.29	2.31
Prochlorococcus marinus MIT9301	C1-2111122112	S-111111112221	0.313399	0.7	2.09	0.44	2.39
Prochlorococcus marinus MIT9312	C1-21111222	S-111111112222	0.312105	0.68	2.4	0	2.15
Prochlorococcus marinus MIT9211	C1-211121	S-11111112	0.396825	1.08	2.06	0.93	2.85
Prochlorococcus marinus MIT9313	C1-21121	S-1111112	0.507398	2.41	0.82	1.88	6.64
Prochlorococcus marinus MIT9303	C1-21122	S-111112	0.500076	2.54	0.85	1.69	6.06
Synechococcus WH8102	C1-212111	S-11112111111	0.592176	2.28	0.96	3.27	7.93
Synechococcus BL107	C1-212121	S-1111211111121	0.54205	3.1	1.19	3.37	8.07
Synechococcus CC9902	C1-212122	S-1111211111122	0.597981	3.11	1.1	3.47	7.79
Synechococcus CC9605	C1-2121121	S-11112111112	0.541645	2.15	1.14	2.7	7.39
Synechococcus RS9916	C1-212221	S-11112111121	0.643252	2.81	1.16	2.53	8.48
Synechococcus RS9917	C1-212222	S-11112111122	0.411368	4.82	1	4.84	7.65
Synechococcus RCC307	C1-1	S-111121112	0.608435	2.8	0.95	1.82	11.47
Synechococcus CC9311	C1-2122121	S-11112112	0.342759	3.44	1.06	2.67	6.39
Synechococcus WH7805	C1-2122111	S-11112121	0.554378	2.86	1.14	2.37	7.67
Synechococcus WH7803	C1-2122112	S-11112122	0.60236	3.67	1.02	2.53	8.97
Synechococcus WH5701	C1-221	S-11112211	0.660416	3.24	1.26	5.01	4.86
Cyanobium gracile PCC 6307	C1-22221	S-11112212	0.687072	2.5	1.35	3.98	4.67
Paulinella chromatophora chromatophore	C1-2222x	S-1111222	0.379874	1.73	2.17	0.57	2.08
Synechococcus elongatus PCC 7942	C2-1	S-11121	0.594126	121.37	0.6	2.17	5.49
Synechococcus elongatus PCC 6301	C2-2	S-11122	0.554843	120.8	0.59	2.22	5.55
Prochlorothrix hollandica PCC 9006	C22-1	S-112	0.541926	33.35	5.05	3.9	3.43
Thermosynechococcus elongatus BP1	E-111	S-1211	0.539179	69.63	1.08	0.18	4.04
Thermosynechococcus NK55a	E-112x	S-1212	0.538072	69.6	0.96	0.11	3.79
Cyanothece PCC 7425	E-12	S-1221	0.506484	38.43	0.16	3.59	4.48
Acaryochloris marina MBIC11017	E-21	S-1222	0.469559	24.18	0.12	0.75	3.37
Pseudanabaena PCC 7367	F-2	S-2	0.462239	110.75	0.15	11.53	4.37
Leptolyngbya PCC 6406	C3-1	T-11	0.551053	41.61	1.27	0.36	3.67
Leptolyngbya Heron Island J	C3-1x	T-12	0.480491	36.64	0.12	0.63	3.22
Geitlerinema PCC 7407	D-1	T-2	0.584631	95.12	0.32	1.1	4.77
Synechococcus PCC 7336	G-21	U-1	0.575433	81.58	0.17	5.99	0.48
Synechococcus os type A prime	G-11	V-1	0.602373	0.77	39.3	0.27	4.02
Synechococcus os type B prime	G-12	V-2	0.584503	0.7	50.03	0.19	4.02
Gloeobacter violaceus PCC 7421	H-1	W-1	0.619979	2.13	0.38	3.25	3.42
Gloeobacter kilaueensis JS1	H-1x	W-2	0.605368	3.41	0.18	4.92	3.21

## Sheet: Figure 2B-Frequency
Organism	Shih	ML	GC%	GCGATCGC	GGGATCCC	TCGATCGA	GGCGCC	rCCGGy	GCsGC
Trichodesmium erythraeum IMS101	A-111	P-111	0.341434	375.221	1.54837	0.516123	16.774	724.272	124.902
Lyngbya PCC 8106	A-1121	P-1121	0.411069	430.835	0.426288	1.70515	60.2487	830.278	538.543
Arthrospira platensis NIES-39	A-112212	P-1122	0.436504	1131.78	0.883858	1.4731	4.5666	648.968	766.231
Oscillatoria nigro-viridis PCC 7112	A-1211	P-121	0.457845	629.696	0	173.351	88.7305	135.947	1312.22
Planktothrix rubescens niva-cya 407	A-1212x	P-122	0.386887	503.533	0.3633	0.54495	34.6951	19.9154	476.285
Oscillatoria acuminata PCC 6304	A-21	P-2	0.476122	1294.29	6.9193	2.05016	0.768811	74.6952	849.151
Dactylococcopsis salina PCC 8305	B2-111	Q-1111111	0.424384	425.285	0.528961	315.525	33.3245	2287.26	538.746
Halothece PCC 7418	B2-112	Q-1111112	0.429225	709.473	2.15354	5.74279	6.93919	4952.18	39.9602
Microcystis aeruginosa NIES843	B2-2112211	Q-111112	0.423306	311.667	15.7459	93.2775	24.6458	180.865	807.748
Pleurocapsa PCC 7327	B2-21121	Q-111121	0.451933	1238.07	4.21111	69.5837	33.4884	243.875	962.138
Cyanothece PCC 7822	B2-2112221	Q-1111221	0.398958	110.687	0	4.84574	1.2752	4.98185	1247.27
Cyanothece PCC 7424	B2-2112222	Q-1111222	0.385098	379.149	0.6103	21.5131	0.915449	269.533	446.739
Epithemia turgida etsb endosymbiont	B2-21111x	Q-111211	0.334135	36.8607	1.07361	0.715742	6.79954	172.428	216.869
Candidatus atelocyanobacterium thalassa	B2-2111111	Q-1112121	0.311168	25.627	0.69262	0.69262	9.69666	86.0271	114.282
Cyanothece CCY0110	B2-211111211	Q-11121211	0.366935	478.359	0.510159	0.170053	3.40106	46.9399	92.5088
Cyanothece ATCC 51142	B2-211111212x	Q-11121212	0.379419	474.144	0	2.19766	3.29648	250.211	145.961
Crocosphaera watsonii WH8501	B2-211111222	Q-11121222	0.370982	472.18	0.964616	1.12539	3.37615	3.99304	187.537
Cyanothece PCC 8802	B2-2111121	Q-111221	0.398179	633.727	0.208189	2.29008	0.624566	42.8137	316.967
Cyanothece PCC 8801	B2-2111122	Q-111222	0.397098	617.796	0.218534	1.96681	1.3112	48.5135	317.202
Stanieria cyanosphaera PCC 7437	B2-2221	Q-112	0.524473	817.857	0.54103	3.78721	1.98378	255.434	19.9279
Synechocystis PCC 6803	B2-21112	Q-121	0.473596	855.711	10.3615	0.25272	45.7423	175.819	1171.74
Synechococcus PCC 7002	B2-22111	Q-1221	0.49187	1638.16	10.8507	2.05283	60.7051	181.219	1491.97
Leptolyngbya PCC 7376	B2-22112	Q-1222	0.438674	1263.38	2.92629	6.24276	26.9219	187.724	798.39
Prochloron didemni P4-Papua New Guinea	B2-2212X	Q-21	0.418982	489.577	3.69293	3.69293	4.04463	195.194	485.268
Cyanobacterium stanieri PCC 7202	B2-22121	Q-2211	0.386647	652.469	4.74178	0	98.9451	127.047	399.099
Geminocystis herdmanii PCC 6308	B2-221221	Q-2212	0.537075	121.499	0.469109	704.601	22.0481	316.327	243.35
Cyanobacterium aponinum PCC 10605	B2-221222	Q-222	0.349314	532.205	0.239409	23.2226	16.7586	190.937	386.764
Oscillatoria PCC 10802	A-22	R-11	0.539447	103.323	0.46542	6.05046	1.86168	1954.91	1965.47
Mastigocladopsis repens PCC 10914	B1-11112	R-1211	0.435719	471.894	0.334677	1.17137	14.5584	270.807	610.952
Calothrix PCC 7103	B1-11121	R-1212111	0.385345	14.157	0.172646	1.03588	1535.34	189.318	357.421
Calothrix PCC 6303	B1-11122	R-1212112	0.397969	685.164	2.15506	10.0569	0.718351	135.443	382.019
Chlorogloeopsis fritschii PCC 6912	B1-12x	R-12121211	0.414717	912.304	0.259509	4.2819	2.98435	108.85	561.123
Fischerella thermalis PCC 7521	B1-12y	R-12121212	0.410156	888.803	0.735612	0.735612	16.9191	221.773	436.861
Rivularia PCC 7116	B1-12	R-12121221	0.375316	256.279	0.114564	2.74953	0.229128	385.991	353.544
Richelia intracellularis HH01	B1-12z	R-12121222	0.337117	9.24857	1.84971	0	5.24085	241.369	125.78
Nostoc PCC 7524	B1-1121111	R-121221111111	0.415311	836.75	0.29767	0.29767	0.29767	166.254	620.864
Anabaena PCC 7120	B1-11211121	R-12122111111211	0.412683	789.681	0.138662	0.138662	1.94127	89.2522	615.174
Anabaena variabilis ATCC 29413	B1-11211122	R-12122111111212	0.414098	803.998	0.140731	0.844388	0.844388	400.557	632.235
Nostoc PCC 7107	B1-112112	R-1212211111122	0.403578	917.721	0.315965	0.631931	0.473948	3224.28	702.943
Microchaete PCC 7126	B1-11212212	R-12122111112	0.422068	890.487	0.697601	1.0464	105.163	2767.74	664.202
Nostoc punctiforme ATCC 29133	B1-1121222	R-1212211112	0.413545	833.188	0.220771	5.85042	1.32462	182.21	592.217
Cylindrospermum stagnale PCC 7417	B1-11212111	R-121221112	0.422016	688.253	0	0.919773	37.7107	1304.18	714.137
Anabaena PCC 7108	B1-1121211212	R-12122112	0.387742	449.826	0	0.339747	0.169874	119.353	409.735
Nodularia spumigena CCY9414	B1-1121212	R-1212212111	0.412658	746.392	0	0	2.25723	149.947	591.112
Scytonema hofmanni UTEX 2349	B1-1121212y	R-1212212112	0.362232	1021.71	0	0.614747	37.6225	97.3285	489.461
Anabaena 90	B1-112121x	R-121221212	0.380965	385.249	0.188478	0.188478	1.31934	332.212	411.164
Calothrix PCC 7507	B1-11212211	R-12122122	0.422472	919.239	0	2.42055	13.8114	132.213	636.604
Anabaena cylindrica PCC 7122	B1-1121211211	R-1212221	0.387906	525.819	0	0.56631	1.69893	676.697	389.267
Raphidiopsis brookii d9	B1-11212112211	R-121222211	0.400568	427.429	10.9838	0	17.2603	123.161	170.72
Cylindrospermopsis raciborskii CS-505	B1-11212112212	R-121222212	0.402342	482.339	11.0853	0.773392	21.9127	657.391	173.497
Nostoc azollae-0708	B1-1121211222	R-12122222	0.383737	203.604	1.45822	0.911389	4.55694	79.9999	297.386
Gloeocapsa PCC 7428	B1-221	R-12211	0.432694	1360.05	0	16.3861	2.39347	702.949	924.248
Chroococcidiopsis thermalis PCC 7203	B1-222	R-12212	0.444747	1503.28	1.04643	44.8472	0.448471	115.722	835.502
Microcoleus PCC 7113	B3-2	R-1222	0.462133	721.145	0.125526	5.77418	0.878679	5990.41	950.605
Crinalium epipsammum PCC 9333	B4-1	R-211	0.401626	906.164	0	0.533771	0.53377	328.891	424.97
Oscillatoriales cyanobacterium JSC-12	B4-1x	R-212	0.474716	1220.33	1.80816	5.06285	17.1775	795.977	952.629
Chamaesiphon minutus PCC 6605	B4-2	R-22	0.456701	447.813	0	749.51	1.47891	650.488	1197.77
Prochlorococcus marinus NATL2a	C1-2111111	S-1111111111	0.35123	2.17051	3.79839	5.42628	24.4182	1385.77	250.15
Prochlorococcus marinus NATL1a	C1-2111112	S-1111111112	0.349793	1.60882	2.68137	6.43529	27.8862	1799.2	227.111
Prochlorococcus marinus SS120	C1-211122	S-111111112111	0.364421	1.71324	3.42648	3.42648	33.6937	890.078	218.152
Prochlorococcus marinus MED4	C1-21111211	S-111111112112	0.307992	0.603145	4.22202	1.80944	13.8723	1395.27	143.548
Prochlorococcus marinus MIT9515	C1-21111212	S-11111111212	0.307942	1.1736	4.69439	4.69439	15.8435	3678.43	150.513
Prochlorococcus marinus AS9601	C1-2111122111	S-11111111221	0.313215	1.1977	2.99424	2.39539	20.3608	128.863	153.005
Prochlorococcus marinus MIT9301	C1-2111122112	S-111111112221	0.313399	1.21813	3.65438	3.65438	19.49	284.805	154.093
Prochlorococcus marinus MIT9312	C1-21111222	S-111111112222	0.312105	1.17014	4.09551	0	19.8924	1215.3	143.635
Prochlorococcus marinus MIT9211	C1-211121	S-11111112	0.396825	5.98155	11.4193	11.9631	83.1977	2398.1	504.623
Prochlorococcus marinus MIT9313	C1-21121	S-1111112	0.507398	38.9903	13.2733	28.6205	243.896	2167.16	1265.31
Prochlorococcus marinus MIT9303	C1-21122	S-111112	0.500076	38.7675	13.0467	25.7207	240.433	1212.17	1236.46
Synechococcus WH8102	C1-212111	S-11112111111	0.592176	64.4919	27.1112	43.1315	552.904	43.8615	2757.95
Synechococcus BL107	C1-212121	S-1111211111121	0.54205	64.7697	24.9451	49.8902	334.351	773.097	1707.64
Synechococcus CC9902	C1-212122	S-1111211111122	0.597981	64.4349	22.8207	51.4584	348.574	377.72	1709.31
Synechococcus CC9605	C1-2121121	S-11112111112	0.541645	60.1439	31.8643	35.8474	571.167	916.851	2699.7
Synechococcus RS9916	C1-212221	S-11112111121	0.643252	81.055	33.3976	33.0224	620.295	2142.39	2667.11
Synechococcus RS9917	C1-212222	S-11112111122	0.411368	170.993	35.5913	51.8394	1255.75	2614.93	4334
Synechococcus RCC307	C1-1	S-111121112	0.608435	84.9476	28.7653	22.9224	911.5	45.0857	4190.96
Synechococcus CC9311	C1-2122121	S-11112112	0.342759	63.2976	19.5647	40.2803	273.522	272.701	1400.41
Synechococcus WH7805	C1-2122111	S-11112121	0.554378	74.0133	29.3764	32.81	416.992	2200.1	2092.01
Synechococcus WH7803	C1-2122112	S-11112122	0.60236	108.155	29.9962	32.5311	608.373	3607.46	2631.63
Synechococcus WH5701	C1-221	S-11112211	0.660416	121.31	47.1954	49.293	1255.4	1050.77	5024.73
Cyanobium gracile PCC 6307	C1-22221	S-11112212	0.687072	100.528	54.1535	33.2102	1776.59	94.3213	6328.47
Paulinella chromatophora chromatophore	C1-2222x	S-1111222	0.379874	7.83084	9.78855	6.85198	46.006	1065.59	372.452
Synechococcus elongatus PCC 7942	C2-1	S-11121	0.594126	2733	13.4541	31.6353	154.904	259.532	2361.37
Synechococcus elongatus PCC 6301	C2-2	S-11122	0.554843	2728.24	13.3519	32.2671	158.739	411.202	2367.18
Prochlorothrix hollandica PCC 9006	C22-1	S-112	0.541926	710.55	107.681	57.5595	0.88553	54.6765	1502.04
Thermosynechococcus elongatus BP1	E-111	S-1211	0.539179	1419.13	21.9751	2.6987	279.508	81.3244	2085.7
Thermosynechococcus NK55a	E-112x	S-1212	0.538072	1408.31	19.4441	1.58727	308.724	126.431	2131.1
Cyanothece PCC 7425	E-12	S-1221	0.506484	617.169	2.59242	54.7865	26.2699	337.683	1181.37
Acaryochloris marina MBIC11017	E-21	S-1222	0.469559	284.874	1.43513	11.2419	34.0844	116.5	753.804
Pseudanabaena PCC 7367	F-2	S-2	0.462239	1220.3	1.63744	171.932	9.00593	91.9678	1287.34
Leptolyngbya PCC 6406	C3-1	T-11	0.551053	925.23	28.2156	5.19306	1.55792	837.533	1927.4
Leptolyngbya Heron Island J	C3-1x	T-12	0.480491	475.313	1.61207	9.54843	1.11605	98.2591	1076
Geitlerinema PCC 7407	D-1	T-2	0.584631	2559.66	8.54501	14.9538	336.246	281.189	3123.94
Synechococcus PCC 7336	G-21	U-1	0.575433	1640.54	3.35529	89.4087	37.1056	80.8438	1890.01
Synechococcus os type A prime	G-11	V-1	0.602373	22.8454	1159.66	3.40977	478.39	87.4553	3398.17
Synechococcus os type B prime	G-12	V-2	0.584503	18.709	1345.4	2.62582	238.621	758.198	2469.74
Gloeobacter violaceus PCC 7421	H-1	W-1	0.619979	68.2549	12.0197	39.0641	643.914	116.371	4573.61
Gloeobacter kilaueensis JS1	H-1x	W-2	0.605368	102.015	5.29125	62.6485	1.05825	99.1682	3655.3

## Sheet: Figure S1A-Markov(1st)
Organism	Shih	ML	GC%	GCGATCGC	GGGATCCC	TCGATCGA
Trichodesmium erythraeum IMS101	A-111	P-111	0.341434	401.95	0.29	0.2
Lyngbya PCC 8106	A-1121	P-1121	0.411069	68.64	0.04	0.1
Arthrospira platensis NIES-39	A-112212	P-1122	0.436504	194.14	0.04	0.16
Oscillatoria nigro-viridis PCC 7112	A-1211	P-121	0.457845	39.88	0	12.38
Planktothrix rubescens niva-cya 407	A-1212x	P-122	0.386887	129.07	0.02	0.06
Oscillatoria acuminata PCC 6304	A-21	P-2	0.476122	118.48	0.2	0.12
Dactylococcopsis salina PCC 8305	B2-111	Q-1111111	0.424384	57	0.04	18.44
Halothece PCC 7418	B2-112	Q-1111112	0.429225	91.04	0.17	0.4
Microcystis aeruginosa NIES843	B2-2112211	Q-111112	0.423306	44.2	0.86	6.89
Pleurocapsa PCC 7327	B2-21121	Q-111121	0.451933	56.09	0.41	2.71
Cyanothece PCC 7822	B2-2112221	Q-1111221	0.398958	21.67	0	0.54
Cyanothece PCC 7424	B2-2112222	Q-1111222	0.385098	98.66	0.05	1.98
Epithemia turgida etsb endosymbiont	B2-21111x	Q-111211	0.334135	26.15	0.21	0.14
Candidatus atelocyanobacterium thalassa	B2-2111111	Q-1112121	0.311168	26.03	0.26	0.2
Cyanothece CCY0110	B2-211111211	Q-11121211	0.366935	205.76	0.06	0.02
Cyanothece ATCC 51142	B2-211111212x	Q-11121212	0.379419	192	0	0.29
Crocosphaera watsonii WH8501	B2-211111222	Q-11121222	0.370982	266.1	0.09	0.19
Cyanothece PCC 8802	B2-2111121	Q-111221	0.398179	155.58	0.01	0.22
Cyanothece PCC 8801	B2-2111122	Q-111222	0.397098	153.45	0.02	0.19
Stanieria cyanosphaera PCC 7437	B2-2221	Q-112	0.524473	237.77	0.15	0.53
Synechocystis PCC 6803	B2-21112	Q-121	0.473596	156.96	0.33	0.05
Synechococcus PCC 7002	B2-22111	Q-1221	0.49187	126.27	0.37	0.17
Leptolyngbya PCC 7376	B2-22112	Q-1222	0.438674	107.55	0.28	0.39
Prochloron didemni P4-Papua New Guinea	B2-2212X	Q-21	0.418982	110.02	0.29	0.51
Cyanobacterium stanieri PCC 7202	B2-22121	Q-2211	0.386647	294.36	0.25	0
Geminocystis herdmanii PCC 6308	B2-221221	Q-2212	0.537075	53.31	0.06	81.52
Cyanobacterium aponinum PCC 10605	B2-221222	Q-222	0.349314	314.84	0.03	4.39
Oscillatoria PCC 10802	A-22	R-11	0.539447	4.99	0.02	0.66
Mastigocladopsis repens PCC 10914	B1-11112	R-1211	0.435719	79.51	0.05	0.18
Calothrix PCC 7103	B1-11121	R-1212111	0.385345	3.05	0.05	0.19
Calothrix PCC 6303	B1-11122	R-1212112	0.397969	177.52	0.27	1.6
Chlorogloeopsis fritschii PCC 6912	B1-12x	R-12121211	0.414717	161.22	0.05	0.72
Fischerella thermalis PCC 7521	B1-12y	R-12121212	0.410156	221.35	0.12	0.15
Rivularia PCC 7116	B1-12	R-12121221	0.375316	51.53	0.02	0.37
Richelia intracellularis HH01	B1-12z	R-12121222	0.337117	12.8	0.34	0
Nostoc PCC 7524	B1-1121111	R-121221111111	0.415311	210.34	0.04	0.06
Anabaena PCC 7120	B1-11211121	R-12122111111211	0.412683	183.11	0.02	0.03
Anabaena variabilis ATCC 29413	B1-11211122	R-12122111111212	0.414098	183.32	0.02	0.15
Nostoc PCC 7107	B1-112112	R-1212211111122	0.403578	185.11	0.06	0.11
Microchaete PCC 7126	B1-11212212	R-12122111112	0.422068	141.35	0.09	0.15
Nostoc punctiforme ATCC 29133	B1-1121222	R-1212211112	0.413545	151.11	0.03	0.91
Cylindrospermum stagnale PCC 7417	B1-11212111	R-121221112	0.422016	127.24	0	0.15
Anabaena PCC 7108	B1-1121211212	R-12122112	0.387742	152.16	0	0.07
Nodularia spumigena CCY9414	B1-1121212	R-1212212111	0.412658	167.11	0	0
Scytonema hofmanni UTEX 2349	B1-1121212y	R-1212212112	0.362232	157.28	0	0.08
Anabaena 90	B1-112121x	R-121221212	0.380965	145.64	0.02	0.04
Calothrix PCC 7507	B1-11212211	R-12122122	0.422472	165.83	0	0.38
Anabaena cylindrica PCC 7122	B1-1121211211	R-1212221	0.387906	177.19	0	0.12
Raphidiopsis brookii d9	B1-11212112211	R-121222211	0.400568	261.79	0.84	0
Cylindrospermopsis raciborskii CS-505	B1-11212112212	R-121222212	0.402342	276.17	0.83	0.21
Nostoc azollae-0708	B1-1121211222	R-12122222	0.383737	108.39	0.2	0.25
Gloeocapsa PCC 7428	B1-221	R-12211	0.432694	87.3	0	1.24
Chroococcidiopsis thermalis PCC 7203	B1-222	R-12212	0.444747	109.89	0.15	3.27
Microcoleus PCC 7113	B3-2	R-1222	0.462133	77.2	0.01	0.52
Crinalium epipsammum PCC 9333	B4-1	R-211	0.401626	186.05	0	0.1
Oscillatoriales cyanobacterium JSC-12	B4-1x	R-212	0.474716	107.69	0.15	0.49
Chamaesiphon minutus PCC 6605	B4-2	R-22	0.456701	17.45	0	24.24
Prochlorococcus marinus NATL2a	C1-2111111	S-1111111111	0.35123	1.45	0.68	1.23
Prochlorococcus marinus NATL1a	C1-2111112	S-1111111112	0.349793	1.1	0.49	1.47
Prochlorococcus marinus SS120	C1-211122	S-111111112111	0.364421	1.04	0.62	0.99
Prochlorococcus marinus MED4	C1-21111211	S-111111112112	0.307992	1	0.93	0.69
Prochlorococcus marinus MIT9515	C1-21111212	S-11111111212	0.307942	1.84	1.01	1.66
Prochlorococcus marinus AS9601	C1-2111122111	S-11111111221	0.313215	1.77	0.64	0.87
Prochlorococcus marinus MIT9301	C1-2111122112	S-111111112221	0.313399	1.81	0.79	1.35
Prochlorococcus marinus MIT9312	C1-21111222	S-111111112222	0.312105	1.87	0.88	0
Prochlorococcus marinus MIT9211	C1-211121	S-11111112	0.396825	1.67	1.42	2.05
Prochlorococcus marinus MIT9313	C1-21121	S-1111112	0.507398	2.69	0.91	2.84
Prochlorococcus marinus MIT9303	C1-21122	S-111112	0.500076	2.82	0.91	2.55
Synechococcus WH8102	C1-212111	S-11112111111	0.592176	1.87	0.88	2.7
Synechococcus BL107	C1-212121	S-1111211111121	0.54205	2.42	1.11	2.78
Synechococcus CC9902	C1-212122	S-1111211111122	0.597981	2.39	1.03	2.83
Synechococcus CC9605	C1-2121121	S-11112111112	0.541645	1.82	1.07	2.44
Synechococcus RS9916	C1-212221	S-11112111121	0.643252	2.48	1.18	2.5
Synechococcus RS9917	C1-212222	S-11112111122	0.411368	3.12	0.91	3.31
Synechococcus RCC307	C1-1	S-111121112	0.608435	2.61	1.3	3.06
Synechococcus CC9311	C1-2122121	S-11112112	0.342759	2.93	1.12	2.53
Synechococcus WH7805	C1-2122111	S-11112121	0.554378	2.24	1.04	1.65
Synechococcus WH7803	C1-2122112	S-11112122	0.60236	2.69	0.98	1.84
Synechococcus WH5701	C1-221	S-11112211	0.660416	2.63	0.97	4.08
Cyanobium gracile PCC 6307	C1-22221	S-11112212	0.687072	1.96	0.89	2.89
Paulinella chromatophora chromatophore	C1-2222x	S-1111222	0.379874	2.17	1.79	1.01
Synechococcus elongatus PCC 7942	C2-1	S-11121	0.594126	70.99	0.81	1.68
Synechococcus elongatus PCC 6301	C2-2	S-11122	0.554843	70.71	0.8	1.72
Prochlorothrix hollandica PCC 9006	C22-1	S-112	0.541926	79.78	1.98	8.76
Thermosynechococcus elongatus BP1	E-111	S-1211	0.539179	105.63	0.79	0.41
Thermosynechococcus NK55a	E-112x	S-1212	0.538072	103.59	0.73	0.25
Cyanothece PCC 7425	E-12	S-1221	0.506484	62.99	0.09	6.44
Acaryochloris marina MBIC11017	E-21	S-1222	0.469559	32.3	0.07	1.08
Pseudanabaena PCC 7367	F-2	S-2	0.462239	81.97	0.11	17.31
Leptolyngbya PCC 6406	C3-1	T-11	0.551053	65.57	0.65	0.59
Leptolyngbya Heron Island J	C3-1x	T-12	0.480491	47.38	0.11	1.17
Geitlerinema PCC 7407	D-1	T-2	0.584631	62.72	0.3	0.88
Synechococcus PCC 7336	G-21	U-1	0.575433	48.57	0.14	3.99
Synechococcus os type A prime	G-11	V-1	0.602373	1.19	29.88	0.54
Synechococcus os type B prime	G-12	V-2	0.584503	1.15	33.37	0.4
Gloeobacter violaceus PCC 7421	H-1	W-1	0.619979	1.23	0.43	2.24
Gloeobacter kilaueensis JS1	H-1x	W-2	0.605368	1.99	0.22	3.32

## Sheet: Figure S1B-Markov(2nd)
Organism	Shih	ML	GC%	GCGATCGC	GGGATCCC	TCGATCGA
Trichodesmium erythraeum IMS101	A-111	P-111	0.341434	319.58	0.31	0.17
Lyngbya PCC 8106	A-1121	P-1121	0.411069	44.82	0.03	0.07
Arthrospira platensis NIES-39	A-112212	P-1122	0.436504	96.09	0.04	0.1
Oscillatoria nigro-viridis PCC 7112	A-1211	P-121	0.457845	23.42	0	5.65
Planktothrix rubescens niva-cya 407	A-1212x	P-122	0.386887	94.06	0.02	0.05
Oscillatoria acuminata PCC 6304	A-21	P-2	0.476122	72.92	0.16	0.09
Dactylococcopsis salina PCC 8305	B2-111	Q-1111111	0.424384	22.48	0.02	11.42
Halothece PCC 7418	B2-112	Q-1111112	0.429225	44.79	0.1	0.33
Microcystis aeruginosa NIES843	B2-2112211	Q-111112	0.423306	24.73	0.66	3.37
Pleurocapsa PCC 7327	B2-21121	Q-111121	0.451933	31.63	0.31	1.1
Cyanothece PCC 7822	B2-2112221	Q-1111221	0.398958	17.76	0	0.49
Cyanothece PCC 7424	B2-2112222	Q-1111222	0.385098	78.71	0.04	1.76
Epithemia turgida etsb endosymbiont	B2-21111x	Q-111211	0.334135	21.75	0.15	0.11
Candidatus atelocyanobacterium thalassa	B2-2111111	Q-1112121	0.311168	29.1	0.26	0.19
Cyanothece CCY0110	B2-211111211	Q-11121211	0.366935	153.16	0.05	0.02
Cyanothece ATCC 51142	B2-211111212x	Q-11121212	0.379419	154.79	0	0.19
Crocosphaera watsonii WH8501	B2-211111222	Q-11121222	0.370982	193.76	0.07	0.13
Cyanothece PCC 8802	B2-2111121	Q-111221	0.398179	100.27	0.01	0.16
Cyanothece PCC 8801	B2-2111122	Q-111222	0.397098	99.36	0.01	0.14
Stanieria cyanosphaera PCC 7437	B2-2221	Q-112	0.524473	114.9	0.13	0.19
Synechocystis PCC 6803	B2-21112	Q-121	0.473596	130.66	0.29	0.04
Synechococcus PCC 7002	B2-22111	Q-1221	0.49187	61.79	0.34	0.07
Leptolyngbya PCC 7376	B2-22112	Q-1222	0.438674	62.36	0.32	0.17
Prochloron didemni P4-Papua New Guinea	B2-2212X	Q-21	0.418982	76.14	0.23	0.4
Cyanobacterium stanieri PCC 7202	B2-22121	Q-2211	0.386647	136.46	0.23	0
Geminocystis herdmanii PCC 6308	B2-221221	Q-2212	0.537075	31.24	0.05	33.92
Cyanobacterium aponinum PCC 10605	B2-221222	Q-222	0.349314	208.01	0.02	3.18
Oscillatoria PCC 10802	A-22	R-11	0.539447	4.77	0.02	0.81
Mastigocladopsis repens PCC 10914	B1-11112	R-1211	0.435719	53.29	0.04	0.17
Calothrix PCC 7103	B1-11121	R-1212111	0.385345	2.02	0.05	0.16
Calothrix PCC 6303	B1-11122	R-1212112	0.397969	97.86	0.17	0.9
Chlorogloeopsis fritschii PCC 6912	B1-12x	R-12121211	0.414717	84.83	0.03	0.39
Fischerella thermalis PCC 7521	B1-12y	R-12121212	0.410156	109.53	0.08	0.09
Rivularia PCC 7116	B1-12	R-12121221	0.375316	42.11	0.02	0.28
Richelia intracellularis HH01	B1-12z	R-12121222	0.337117	13.54	0.31	0
Nostoc PCC 7524	B1-1121111	R-121221111111	0.415311	116.82	0.03	0.05
Anabaena PCC 7120	B1-11211121	R-12122111111211	0.412683	102.07	0.01	0.02
Anabaena variabilis ATCC 29413	B1-11211122	R-12122111111212	0.414098	103.17	0.01	0.12
Nostoc PCC 7107	B1-112112	R-1212211111122	0.403578	94.7	0.05	0.08
Microchaete PCC 7126	B1-11212212	R-12122111112	0.422068	71.56	0.07	0.11
Nostoc punctiforme ATCC 29133	B1-1121222	R-1212211112	0.413545	82.79	0.03	0.54
Cylindrospermum stagnale PCC 7417	B1-11212111	R-121221112	0.422016	72.98	0	0.11
Anabaena PCC 7108	B1-1121211212	R-12122112	0.387742	101.07	0	0.08
Nodularia spumigena CCY9414	B1-1121212	R-1212212111	0.412658	98.57	0	0
Scytonema hofmanni UTEX 2349	B1-1121212y	R-1212212112	0.362232	87.74	0	0.05
Anabaena 90	B1-112121x	R-121221212	0.380965	102.6	0.02	0.05
Calothrix PCC 7507	B1-11212211	R-12122122	0.422472	87.28	0	0.26
Anabaena cylindrica PCC 7122	B1-1121211211	R-1212221	0.387906	116.9	0	0.12
Raphidiopsis brookii d9	B1-11212112211	R-121222211	0.400568	179.31	0.65	0
Cylindrospermopsis raciborskii CS-505	B1-11212112212	R-121222212	0.402342	183.79	0.64	0.23
Nostoc azollae-0708	B1-1121211222	R-12122222	0.383737	76.79	0.17	0.29
Gloeocapsa PCC 7428	B1-221	R-12211	0.432694	36.44	0	0.59
Chroococcidiopsis thermalis PCC 7203	B1-222	R-12212	0.444747	52.13	0.1	1.23
Microcoleus PCC 7113	B3-2	R-1222	0.462133	51.67	0.01	0.34
Crinalium epipsammum PCC 9333	B4-1	R-211	0.401626	87.09	0	0.06
Oscillatoriales cyanobacterium JSC-12	B4-1x	R-212	0.474716	55.38	0.1	0.22
Chamaesiphon minutus PCC 6605	B4-2	R-22	0.456701	6.79	0	4.78
Prochlorococcus marinus NATL2a	C1-2111111	S-1111111111	0.35123	1.11	0.76	0.96
Prochlorococcus marinus NATL1a	C1-2111112	S-1111111112	0.349793	0.86	0.54	1.12
Prochlorococcus marinus SS120	C1-211122	S-111111112111	0.364421	0.85	0.69	0.73
Prochlorococcus marinus MED4	C1-21111211	S-111111112112	0.307992	0.77	1.01	0.66
Prochlorococcus marinus MIT9515	C1-21111212	S-11111111212	0.307942	1.38	1.1	1.66
Prochlorococcus marinus AS9601	C1-2111122111	S-11111111221	0.313215	1.22	0.7	0.84
Prochlorococcus marinus MIT9301	C1-2111122112	S-111111112221	0.313399	1.27	0.87	1.26
Prochlorococcus marinus MIT9312	C1-21111222	S-111111112222	0.312105	1.31	0.98	0
Prochlorococcus marinus MIT9211	C1-211121	S-11111112	0.396825	1.28	1.84	1.69
Prochlorococcus marinus MIT9313	C1-21121	S-1111112	0.507398	1.52	1.01	1.05
Prochlorococcus marinus MIT9303	C1-21122	S-111112	0.500076	1.65	1.03	1.01
Synechococcus WH8102	C1-212111	S-11112111111	0.592176	1.2	0.85	1.18
Synechococcus BL107	C1-212121	S-1111211111121	0.54205	1.46	1.07	1.06
Synechococcus CC9902	C1-212122	S-1111211111122	0.597981	1.44	0.99	1.07
Synechococcus CC9605	C1-2121121	S-11112111112	0.541645	1.1	1.03	0.99
Synechococcus RS9916	C1-212221	S-11112111121	0.643252	1.31	1.18	0.92
Synechococcus RS9917	C1-212222	S-11112111122	0.411368	1.45	0.94	0.94
Synechococcus RCC307	C1-1	S-111121112	0.608435	1.1	1.31	0.87
Synechococcus CC9311	C1-2122121	S-11112112	0.342759	1.81	1.07	1.19
Synechococcus WH7805	C1-2122111	S-11112121	0.554378	1.44	1.04	0.78
Synechococcus WH7803	C1-2122112	S-11112122	0.60236	1.48	0.87	0.75
Synechococcus WH5701	C1-221	S-11112211	0.660416	1.25	0.97	1.08
Cyanobium gracile PCC 6307	C1-22221	S-11112212	0.687072	1.05	0.91	0.81
Paulinella chromatophora chromatophore	C1-2222x	S-1111222	0.379874	2.19	2.08	0.7
Synechococcus elongatus PCC 7942	C2-1	S-11121	0.594126	26.81	0.64	0.38
Synechococcus elongatus PCC 6301	C2-2	S-11122	0.554843	26.63	0.64	0.38
Prochlorothrix hollandica PCC 9006	C22-1	S-112	0.541926	31.79	1.3	2.99
Thermosynechococcus elongatus BP1	E-111	S-1211	0.539179	53.24	0.64	0.22
Thermosynechococcus NK55a	E-112x	S-1212	0.538072	51.69	0.59	0.13
Cyanothece PCC 7425	E-12	S-1221	0.506484	38.76	0.06	3.14
Acaryochloris marina MBIC11017	E-21	S-1222	0.469559	23.78	0.07	0.58
Pseudanabaena PCC 7367	F-2	S-2	0.462239	23.32	0.12	2.91
Leptolyngbya PCC 6406	C3-1	T-11	0.551053	36.11	0.56	0.33
Leptolyngbya Heron Island J	C3-1x	T-12	0.480491	32.37	0.12	0.59
Geitlerinema PCC 7407	D-1	T-2	0.584631	27.72	0.29	0.29
Synechococcus PCC 7336	G-21	U-1	0.575433	23.38	0.13	0.96
Synechococcus os type A prime	G-11	V-1	0.602373	0.56	15.5	0.23
Synechococcus os type B prime	G-12	V-2	0.584503	0.59	17.27	0.18
Gloeobacter violaceus PCC 7421	H-1	W-1	0.619979	0.6	0.55	0.61
Gloeobacter kilaueensis JS1	H-1x	W-2	0.605368	0.88	0.25	0.76
