# Supplementary material for: Highly Iterated Palindromic Sequences (HIPs) and Their Relationship to DNA Methyltransferases
Source: Life (Basel). 2015 Mar 17;5(1):921–48. doi: 10.3390/life5010921 (PMC4390886; doi:10.3390/life5010921)
Supplement: Supplementary file 1 [file life-05-00921-s001.zip › Suppl-Table-S3-most-frequent-oligomers.xlsx]

## Sheet: Legend
Supplemental Table S3 - Most frequent n-mers
Column		Explanation
A	Organism	Name of organism (for abbreviation, see Supplemental Table 1)
B	Phylogeny (Shih)	Group per Shih et al (2013) PNAS 110:1053-1058 (my additions marked with x or y)
C	Phylogeny (ML)	Groups per Maximum Likelihood tree (Fig. 1); order used in figures
D	GC%	GC fraction of entire genome (including any plasmids)
E-H	[oligomer]	O/E ratio of given sequence, E calculated by mononucleotide frequencies
Column		Explanation for Figure 2B (frequencies)
A	Organism	Name of organism (for abbreviation, see Supplemental Table 1)
B	Phylogeny (Shih)	Group per Shih et al (2013) PNAS 110:1053-1058 (my additions marked with x or y)
C	Phylogeny (ML)	Groups per Maximum Likelihood tree (Fig. 1); order used in figures
D	GC%	GC fraction of entire genome (including any plasmids)
E-H	[oligomer]	Frequency of given sequence, counts per million nucleotides
Column		Explanation for Figure S1A tab (O/E per 1st order Markov)
A	Organism	Name of organism (for abbreviation, see Supplemental Table 1)
B	Phylogeny (Shih)	Group per Shih et al (2013) PNAS 110:1053-1058 (my additions marked with x or y)
C	Phylogeny (ML)	Groups per Maximum Likelihood tree (Fig. 1); order used in figures
D	GC%	GC fraction of entire genome (including any plasmids)
E-G	[oligomer]	O/E ratio of given sequence, E calculated from 1st order Markov
Column		Explanation for Figure S1B tab (O/E per 2nd order Markov)
A	Organism	Name of organism (for abbreviation, see Supplemental Table 1)
B	Phylogeny (Shih)	Group per Shih et al (2013) PNAS 110:1053-1058 (my additions marked with x or y)
C	Phylogeny (ML)	Groups per Maximum Likelihood tree (Fig. 1); order used in figures
D	GC%	GC fraction of entire genome (including any plasmids)
E-G	[oligomer]	O/E ratio of given sequence, E calculated from 2nd order Markov

## Sheet: Most frequent 5-mers
	Phylogeny			Top pentamer				Top non-excluded				Top mononucleotide repeat				Top excluded				Top palindrome
Organism	Shih	ML	GC%	5-mer	O/E	Counts/M	Rank	5-mer	O/E	Counts/M	Rank	5-mer	O/E	Counts/M	Rank	5-mer	O/E	Counts/M	Rank	5-mer	O/E	Counts/M	Rank
Trichodesmium erythraeum IMS101	A-111	P-111	0.341434	TTTTT	2.01607	7804.66	1	AAAAT	1.55541	6021.34	3	TTTTT	2.01607	7804.66	1	GCGAT	1.34108	723.474	519	AAATT	1.45762	5642.76	5
Lyngbya PCC 8106	A-1121	P-1121	0.411069	AAAAA	1.84553	4086.25	1	AAAAT	1.79694	3978.68	3	AAAAA	1.84553	4086.25	1	ATCGC	1.95534	1472.11	172	AAATT	1.68772	3736.83	5
Arthrospira platensis NIES-39	A-112212	P-1122	0.436504	ATTTT	1.72836	3068.6	1	ATTTT	1.72836	3068.6	1	TTTTT	1.66531	2956.65	3	ATCGC	2.69086	2220.69	15	AATTT	1.64357	2918.05	4
Oscillatoria nigro-viridis PCC 7112	A-1211	P-121	0.457845	AAAAA	2.58773	3787.84	1	AAAAT	2.32139	3397.99	3	AAAAA	2.58773	3787.84	1	GATCG	3.50113	3086.46	7	AAATT	2.24401	3284.72	5
Planktothrix rubescens niva-cya 407	A-1212x	P-122	0.386887	AATTT	1.74342	4720.16	1	AATTT	1.74342	4720.16	1	TTTTT	1.7092	4627.52	3	GCGAT	1.82458	1241.21	236	AATTT	1.74342	4720.16	1
Oscillatoria acuminata PCC 6304	A-21	P-2	0.476122	TTTTT	2.52611	3114.96	1	AAAAT	2.47363	3050.25	2	TTTTT	2.52611	3114.96	1	GCGAT	3.02491	2800.13	7	AATTT	2.47134	3047.43	3
Dactylococcopsis salina PCC 8305	B2-111	Q-1111111	0.424384	AAAAA	1.99085	3931.49	1	ATTTT	1.72032	3397.24	3	AAAAA	1.99085	3931.49	1	CGATC	3.48599	2758.79	13	AATTT	1.62791	3214.75	5
Halothece PCC 7418	B2-112	Q-1111112	0.429225	AAAAA	1.94461	3681.35	1	AAAAT	1.6975	3213.56	3	AAAAA	1.94461	3681.35	1	ATCGC	2.60838	2099.94	44	AAATT	1.59601	3021.41	5
Microcystis aeruginosa NIES843	B2-2112211	Q-111112	0.423306	AAAAA	2.5271	5037.32	1	AAAAT	2.00617	3998.94	3	AAAAA	2.5271	5037.32	1	GATCG	2.32956	1836.45	69	AAATT	1.82629	3640.38	5
Pleurocapsa PCC 7327	B2-21121	Q-111121	0.451933	AAAAA	2.42855	3752.89	1	AAAAT	2.07079	3200.04	7	AAAAA	2.42855	3752.89	1	GATCG	4.17077	3613.73	3	AATTT	2.0281	3134.06	9
Cyanothece PCC 7822	B2-2112221	Q-1111221	0.398958	AAAAA	2.29349	5621.82	1	AAAAT	1.83137	4489.06	3	AAAAA	2.29349	5621.82	1	GCGAT	1.36988	982.026	376	AAATT	1.76665	4330.43	5
Cyanothece PCC 7424	B2-2112222	Q-1111222	0.385098	TTTTT	2.0841	5725.36	1	ATTTT	1.74453	4792.52	3	TTTTT	2.0841	5725.36	1	GATCG	2.01028	1356.54	194	AAATT	1.73359	4762.47	5
Epithemia turgida etsb endosymbiont	B2-21111x	Q-111211	0.334135	TTTTT	1.90222	7781.15	1	ATTTT	1.5493	6337.5	3	TTTTT	1.90222	7781.15	1	ATCGC	1.18672	613.388	581	AATTT	1.38036	5646.46	7
Candidatus atelocyanobacterium thalassa	B2-2111111	Q-1112121	0.311168	AAAAA	1.62464	7873.63	1	AAAAT	1.32481	6420.53	3	AAAAA	1.62464	7873.63	1	GCGAT	0.840289	375.397	707	AAATT	1.18475	5741.77	7
Cyanothece CCY0110	B2-211111211	Q-11121211	0.366935	AAAAA	1.75581	5579.77	1	AAAAT	1.50987	4798.2	3	AAAAA	1.75581	5579.77	1	ATCGC	1.80762	1118.44	299	AAATT	1.33799	4252	5
Cyanothece ATCC 51142	B2-211111212x	Q-11121212	0.379419	AAAAA	1.81057	5207.88	1	AAAAT	1.58938	4571.66	3	AAAAA	1.81057	5207.88	1	GATCG	1.78635	1174.28	271	AAATT	1.40531	4042.21	5
Crocosphaera watsonii WH8501	B2-211111222	Q-11121222	0.370982	AAAAA	2.0063	6175.14	1	AAAAT	1.58362	4874.19	3	AAAAA	2.0063	6175.14	1	GATCG	1.65105	1042.27	337	AAATT	1.30704	4022.92	7
Cyanothece PCC 8802	B2-2111121	Q-111221	0.398179	TTTTT	1.88456	4649.47	1	ATTTT	1.71823	4239.13	3	TTTTT	1.88456	4649.47	1	ATCGC	2.17824	1556.41	148	AAATT	1.66684	4112.34	5
Cyanothece PCC 8801	B2-2111122	Q-111222	0.397098	TTTTT	1.88809	4700.22	1	ATTTT	1.72332	4290.03	3	TTTTT	1.88809	4700.22	1	ATCGC	2.16699	1541.32	151	AAATT	1.66749	4151.04	5
Stanieria cyanosphaera PCC 7437	B2-2221	Q-112	0.524473	TTTTT	1.73661	5726.25	1	AAATT	1.57247	5185.04	3	TTTTT	1.73661	5726.25	1	CGATC	2.8708	1734.36	140	AAATT	1.57247	5185.04	3
Synechocystis PCC 6803	B2-21112	Q-121	0.473596	TTTTT	3.01733	3811.26	1	AATTT	2.80445	3542.37	3	TTTTT	3.01733	3811.26	1	GGCGA	2.24755	1860.02	73	AATTT	2.80445	3542.37	3
Synechococcus PCC 7002	B2-22111	Q-1221	0.49187	AAAAA	3.68	3895.68	1	AAAAT	3.09077	3271.91	3	AAAAA	3.68	3895.68	1	GGCGA	3.17035	2946.68	7	AAATT	2.86167	3029.38	5
Leptolyngbya PCC 7376	B2-22112	Q-1222	0.438674	AAAAA	2.2356	3893.33	1	AAAAT	1.92765	3357.04	3	AAAAA	2.2356	3893.33	1	ATCGC	3.02955	2518.17	9	AATTT	1.6644	2898.58	7
Prochloron didemni P4-Papua New Guinea	B2-2212X	Q-21	0.418982	TTTTT	1.81091	3749.19	1	ATTTT	1.68512	3488.75	2	TTTTT	1.81091	3749.19	1	GCGAT	1.86038	1443.4	175	AATTT	1.55057	3210.2	5
Cyanobacterium stanieri PCC 7202	B2-22121	Q-2211	0.386647	AAAAA	2.36955	6427.93	1	ATTTT	1.91776	5202.35	3	AAAAA	2.36955	6427.93	1	ATCGC	1.96451	1334.96	226	AAATT	1.57341	4268.22	5
Geminocystis herdmanii PCC 6308	B2-221221	Q-2212	0.537075	AAAAA	1.88558	7226.36	1	AAAAT	1.70516	6534.9	3	AAAAA	1.88558	7226.36	1	TCGAT	2.18414	2276.58	71	AATTT	1.50491	5767.44	5
Cyanobacterium aponinum PCC 10605	B2-221222	Q-222	0.349314	TTTTT	1.93438	7051.04	1	ATTTT	1.62425	5920.56	3	TTTTT	1.93438	7051.04	1	GCGAT	2.10265	1185.79	264	AATTT	1.4408	5251.89	5
Oscillatoria PCC 10802	A-22	R-11	0.539447	GCCGG	3.11958	4453.36	1	GCCGG	3.11958	4453.36	1	TTTTT	3.44903	2233.31	21	ATCGC	1.43557	1493.76	134	GCAGC	2.25306	2745.97	5
Mastigocladopsis repens PCC 10914	B1-11112	R-1211	0.435719	TTTTT	1.86445	3333.37	1	AATTT	1.63888	2930.09	3	TTTTT	1.86445	3333.37	1	GCGAT	1.64326	1352.59	182	AATTT	1.63888	2930.09	3
Calothrix PCC 7103	B1-11121	R-1212111	0.385345	AAAAA	1.52837	4190.21	1	AAATT	1.46974	4029.47	3	AAAAA	1.52837	4190.21	1	GGCGC	6.45697	1714.46	124	AAATT	1.46974	4029.47	3
Calothrix PCC 6303	B1-11122	R-1212112	0.397969	AAAAT	1.66834	4123.19	1	AAAAT	1.66834	4123.19	1	AAAAA	1.65078	4079.8	3	ATCGC	2.05011	1463.57	178	AAATT	1.63038	4029.37	5
Chlorogloeopsis fritschii PCC 6912	B1-12x	R-12121211	0.414717	AAAAA	1.77399	3807.77	1	AAATT	1.76915	3797.39	2	AAAAA	1.77399	3807.77	1	GCGAT	2.56691	1959.94	63	AAATT	1.76915	3797.39	2
Fischerella thermalis PCC 7521	B1-12y	R-12121212	0.410156	AAAAA	1.79812	4012.39	1	AATTT	1.70878	3813.04	3	AAAAA	1.79812	4012.39	1	GCGAT	2.33157	1749.1	95	AATTT	1.70878	3813.04	3
Rivularia PCC 7116	B1-12	R-12121221	0.375316	TTTTT	1.5914	4730.79	1	AAAAT	1.52893	4545.08	3	TTTTT	1.5914	4730.79	1	ATCGC	1.81324	1169.01	279	AATTT	1.52562	4535.23	5
Richelia intracellularis HH01	B1-12z	R-12121222	0.337117	AAAAT	1.31263	5250.7	1	AAAAT	1.31263	5250.7	1	TTTTT	1.22353	4894.32	9	GCGAT	0.691479	363.775	770	AAATT	1.227	4908.19	6
Nostoc PCC 7524	B1-1121111	R-121221111111	0.415311	AAATT	1.69445	3618.32	1	AAATT	1.69445	3618.32	1	AAAAA	1.59778	3411.88	4	GCGAT	2.14885	1644.47	109	AAATT	1.69445	3618.32	1
Anabaena PCC 7120	B1-11211121	R-12122111111211	0.412683	AAATT	1.65057	3604.51	1	AAATT	1.65057	3604.51	1	AAAAA	1.61762	3532.55	3	GCGAT	2.17341	1646.61	107	AAATT	1.65057	3604.51	1
Anabaena variabilis ATCC 29413	B1-11211122	R-12122111111212	0.414098	AAATT	1.67385	3611.58	1	AAATT	1.67385	3611.58	1	AAAAA	1.64828	3556.41	2	ATCGC	2.19019	1668.37	98	AAATT	1.67385	3611.58	1
Nostoc PCC 7107	B1-112112	R-1212211111122	0.403578	AATTT	1.7716	4178.16	1	AATTT	1.7716	4178.16	1	TTTTT	1.71064	4034.39	3	GCGAT	2.49805	1825.33	87	AATTT	1.7716	4178.16	1
Microchaete PCC 7126	B1-11212212	R-12122111112	0.422068	TTTTT	1.96609	3961.32	1	AATTT	1.93173	3892.08	2	TTTTT	1.96609	3961.32	1	GCGAT	2.46804	1936.88	63	AATTT	1.93173	3892.08	2
Nostoc punctiforme ATCC 29133	B1-1121222	R-1212211112	0.413545	TTTTT	1.69501	3674.5	1	AAATT	1.63462	3543.58	3	TTTTT	1.69501	3674.5	1	GCGAT	2.46073	1870.48	71	AAATT	1.63462	3543.58	3
Cylindrospermum stagnale PCC 7417	B1-11212111	R-121221112	0.422016	AAAAA	1.86019	3749.64	1	AAATT	1.80752	3643.48	3	AAAAA	1.86019	3749.64	1	GCGAT	2.06948	1623.79	103	AAATT	1.80752	3643.48	3
Anabaena PCC 7108	B1-1121211212	R-12122112	0.387742	AAAAA	1.65148	4440.15	1	AAATT	1.60169	4306.29	3	AAAAA	1.65148	4440.15	1	GCGAT	1.58932	1085.32	344	AAATT	1.60169	4306.29	3
Nodularia spumigena CCY9414	B1-1121212	R-1212212111	0.412658	AAATT	1.82243	3981.37	1	AAATT	1.82243	3981.37	1	TTTTT	1.73039	3780.29	5	ATCGC	2.01606	1527.2	136	AAATT	1.82243	3981.37	1
Scytonema hofmanni UTEX 2349	B1-1121212y	R-1212212112	0.362232	TTTTT	1.77244	3914.21	1	AAATT	1.63621	3613.35	3	TTTTT	1.77244	3914.21	1	GCGAT	2.83463	2136.61	51	AAATT	1.63621	3613.35	3
Anabaena 90	B1-112121x	R-121221212	0.380965	AATTT	1.61982	4601.49	1	AATTT	1.61982	4601.49	1	AAAAA	1.60104	4548.15	3	GCGAT	1.51182	1001	376	AATTT	1.61982	4601.49	1
Calothrix PCC 7507	B1-11212211	R-12122122	0.422472	AAAAA	1.78575	3585.39	1	ATTTT	1.72341	3460.24	3	AAAAA	1.78575	3585.39	1	ATCGC	2.43033	1910.09	61	AATTT	1.70823	3429.77	5
Anabaena cylindrica PCC 7122	B1-1121211211	R-1212221	0.387906	AAAAA	1.64887	4427.26	1	AAATT	1.63806	4398.24	2	AAAAA	1.64887	4427.26	1	ATCGC	1.76841	1208.5	270	AAATT	1.63806	4398.24	2
Raphidiopsis brookii d9	B1-11212112211	R-121222211	0.400568	TTTTT	1.67377	4048.32	1	ATTTT	1.53676	3716.92	3	TTTTT	1.67377	4048.32	1	GCGAT	1.22495	884.039	518	AATTT	1.53338	3708.76	4
Cylindrospermopsis raciborskii CS-505	B1-11212112212	R-121222212	0.402342	TTTTT	1.65558	3945.57	1	ATTTT	1.53995	3669.99	3	TTTTT	1.65558	3945.57	1	GCGAT	1.4021	1019.33	405	AATTT	1.50533	3587.49	5
Nostoc azollae-0708	B1-1121211222	R-12122222	0.383737	AAAAA	1.48187	4116.19	1	AAATT	1.46231	4061.87	3	AAAAA	1.48187	4116.19	1	ATCGC	1.21141	812.41	539	AAATT	1.46231	4061.87	3
Gloeocapsa PCC 7428	B1-221	R-12211	0.432694	AAATT	1.68124	3087.21	1	AAATT	1.68124	3087.21	1	AAAAA	1.64244	3015.95	5	GCGAT	3.77194	3073.21	2	AAATT	1.68124	3087.21	1
Chroococcidiopsis thermalis PCC 7203	B1-222	R-12212	0.444747	GATCG	4.43923	3762.52	1	AAATT	1.92304	3171.73	5	TTTTT	1.76325	2908.18	7	GATCG	4.43923	3762.52	1	AAATT	1.92304	3171.73	5
Microcoleus PCC 7113	B3-2	R-1222	0.462133	TTTTT	1.93456	2721.52	1	AATTT	1.7072	2401.68	3	TTTTT	1.93456	2721.52	1	GCGAT	2.09485	1869.2	16	AATTT	1.7072	2401.68	3
Crinalium epipsammum PCC 9333	B4-1	R-211	0.401626	AAATT	1.64334	3939.57	1	AAATT	1.64334	3939.57	1	TTTTT	1.61996	3883.53	3	ATCGC	2.52744	1832.07	82	AAATT	1.64334	3939.57	1
Oscillatoriales cyanobacterium JSC-12	B4-1x	R-212	0.474716	ATCGC	2.87892	2655.64	1	CAGCA	2.47375	2281.9	5	TTTTT	1.60524	2006.15	20	ATCGC	2.87892	2655.64	1	TGGCA	2.46493	2273.76	7
Chamaesiphon minutus PCC 6605	B4-2	R-22	0.456701	GATCG	6.85738	6025.35	1	AAATT	1.90183	2813.32	7	TTTTT	1.56412	2313.74	17	GATCG	6.85738	6025.35	1	AAATT	1.90183	2813.32	7
Prochlorococcus marinus NATL2a	C1-2111111	S-1111111111	0.35123	AAAAA	1.85596	6666.13	1	AAAAT	1.28293	4607.96	3	AAAAA	1.85596	6666.13	1	ATCGC	0.879757	501.384	681	AAATT	1.18715	4263.93	7
Prochlorococcus marinus NATL1a	C1-2111112	S-1111111112	0.349793	TTTTT	1.85066	6721.08	1	AAAAT	1.27049	4614.07	3	TTTTT	1.85066	6721.08	1	ATCGC	0.845985	478.353	697	AAATT	1.17673	4273.54	7
Prochlorococcus marinus SS120	C1-211122	S-111111112111	0.364421	TTTTT	1.51388	4906.69	1	AAGAA	1.96395	3649.75	3	TTTTT	1.51388	4906.69	1	ATCGC	0.800142	488.841	713	TTTAA	1.0681	3461.86	16
Prochlorococcus marinus MED4	C1-21111211	S-111111112112	0.307992	TTTTT	1.91005	9472.31	1	ATTTT	1.36909	6789.55	3	TTTTT	1.91005	9472.31	1	ATCGC	0.811161	354.646	719	AATTT	1.35267	6708.12	4
Prochlorococcus marinus MIT9515	C1-21111212	S-11111111212	0.307942	AAAAA	1.97188	9782.44	1	AAAAT	1.36876	6790.38	3	AAAAA	1.97188	9782.44	1	ATCGC	0.86329	377.308	688	AAATT	1.35835	6738.74	5
Prochlorococcus marinus AS9601	C1-2111122111	S-11111111221	0.313215	TTTTT	2.07089	9888.1	1	ATTTT	1.44581	6903.47	3	TTTTT	2.07089	9888.1	1	GCGAT	0.843557	382.062	703	AAATT	1.41496	6756.15	5
Prochlorococcus marinus MIT9301	C1-2111122112	S-111111112221	0.313399	TTTTT	2.10675	10045.8	1	ATTTT	1.44524	6891.49	3	TTTTT	2.10675	10045.8	1	ATCGC	0.801825	363.608	721	AATTT	1.43056	6821.45	5
Prochlorococcus marinus MIT9312	C1-21111222	S-111111112222	0.312105	AAAAA	1.98643	9561.76	1	ATTTT	1.40666	6770.99	3	AAAAA	1.98643	9561.76	1	GCGAT	0.813375	365.667	714	AATTT	1.39219	6701.36	5
Prochlorococcus marinus MIT9211	C1-211121	S-11111112	0.396825	TTTTT	1.64202	4097.87	1	TTCTT	1.98239	3254.48	3	TTTTT	1.64202	4097.87	1	ATCGC	0.911619	647.634	653	TTTAA	1.14588	2859.7	14
Prochlorococcus marinus MIT9313	C1-21121	S-1111112	0.507398	ATCAA	3.04853	2846.27	1	ATCAA	3.04853	2846.27	1	AAAAA	1.92057	1740.86	78	CGATC	1.5669	1552.13	125	GCAGC	2.37816	2426.51	9
Prochlorococcus marinus MIT9303	C1-21122	S-111112	0.500076	TTGAT	2.68005	2616.05	1	TTGAT	2.68005	2616.05	1	TTTTT	1.74038	1698.3	77	CGATC	1.52164	1486.2	140	GCAGC	2.32354	2270.12	8
Synechococcus WH8102	C1-212111	S-11112111111	0.592176	GCAGC	2.42562	3833.34	1	GCAGC	2.42562	3833.34	1	GGGGG	0.513344	1187.55	312	GATCG	2.3685	2557.07	35	GCAGC	2.42562	3833.34	1
Synechococcus BL107	C1-212121	S-1111211111121	0.54205	TGGTG	2.33873	2441.1	1	TGGTG	2.33873	2441.1	1	AAAAA	2.47802	1559.71	121	GATCG	2.04021	2129.51	15	GCTGC	1.96348	2425.78	3
Synechococcus CC9902	C1-212122	S-1111211111122	0.597981	TGGTG	2.4027	2506.68	1	TGGTG	2.4027	2506.68	1	TTTTT	2.54587	1609.52	106	GATCG	2.05572	2144.68	15	GCAGC	1.93233	2382.29	5
Synechococcus CC9605	C1-2121121	S-11112111112	0.541645	GCTGC	2.37627	3724.12	1	GCTGC	2.37627	3724.12	1	GGGGG	0.525431	1195.7	310	CGATC	2.25146	2430.04	34	GCTGC	2.37627	3724.12	1
Synechococcus RS9916	C1-212221	S-11112111121	0.643252	GCTGC	2.24585	3607.68	1	GCTGC	2.24585	3607.68	1	CCCCC	0.496434	1186.17	326	GATCG	2.23145	2409.87	41	GCTGC	2.24585	3607.68	1
Synechococcus RS9917	C1-212222	S-11112111122	0.411368	GCAGC	2.3572	4499.18	1	GCAGC	2.3572	4499.18	1	CCCCC	0.402756	1386.12	249	CGATC	3.55772	3766.08	14	GCAGC	2.3572	4499.18	1
Synechococcus RCC307	C1-1	S-111121112	0.608435	GCAGC	3.09624	5192.11	1	GCAGC	3.09624	5192.11	1	CCCCC	0.382414	996.443	386	TGATC	3.62589	2518.3	56	GCAGC	3.09624	5192.11	1
Synechococcus CC9311	C1-2122121	S-11112112	0.342759	TGCTG	2.5242	2573.32	1	TGCTG	2.5242	2573.32	1	TTTTT	2.05126	1558.65	131	CGATC	1.97819	2016.69	21	GCTGC	2.07096	2328.57	5
Synechococcus WH7805	C1-2122111	S-11112121	0.554378	GCTGC	2.07342	3016.21	1	GCTGC	2.07342	3016.21	1	CCCCC	0.460725	908.374	572	GATCG	2.36943	2543.14	11	GCTGC	2.07342	3016.21	1
Synechococcus WH7803	C1-2122112	S-11112122	0.60236	GCTGC	2.16128	3535.73	1	GCTGC	2.16128	3535.73	1	CCCCC	0.440006	1090.42	394	GATCG	2.68876	2903.7	11	GCTGC	2.16128	3535.73	1
Synechococcus WH5701	C1-221	S-11112211	0.660416	GCTGG	2.73259	5516.24	1	GCTGG	2.73259	5516.24	1	GGGGG	0.533221	2093.37	123	CGATC	3.20259	3324.29	40	GCGGC	1.28265	5035.55	3
Cyanobium gracile PCC 6307	C1-22221	S-11112212	0.687072	CCGCC	1.38628	6633.03	1	CCGCC	1.38628	6633.03	1	CCCCC	0.627985	3004.76	68	GATCG	3.09035	3067.29	63	GCGGC	1.32482	6338.93	5
Paulinella chromatophora chromatophore	C1-2222x	S-1111222	0.379874	TAATT	1.33034	3812.59	1	TAATT	1.33034	3812.59	1	TTTTT	1.25827	3606.05	4	CGATC	0.973256	641.141	658	AATTT	1.27876	3664.78	3
Synechococcus elongatus PCC 7942	C2-1	S-11121	0.594126	GATCG	5.82278	6156.49	1	GCTGC	2.47199	3251.51	5	AAAAA	2.05995	1131.23	323	GATCG	5.82278	6156.49	1	GCTGC	2.47199	3251.51	5
Synechococcus elongatus PCC 6301	C2-2	S-11122	0.554843	CGATC	5.83066	6167.44	1	GCAGC	2.48009	3269.72	5	AAAAA	2.05917	1124.89	327	CGATC	5.83066	6167.44	1	GCAGC	2.48009	3269.72	5
Prochlorothrix hollandica PCC 9006	C22-1	S-112	0.541926	GGGGG	2.68766	3925.73	1	TGGGG	2.68761	3318.25	5	GGGGG	2.68766	3925.73	1	CGATC	3.69241	3853.47	2	CCTGG	2.3036	2844.14	10
Thermosynechococcus elongatus BP1	E-111	S-1211	0.539179	GCCAA	2.82902	2942.72	1	GCCAA	2.82902	2942.72	1	GGGGG	1.67313	2382.55	12	GCGAT	2.66594	2773.09	5	TGCCA	2.27863	2370.22	13
Thermosynechococcus NK55a	E-112x	S-1212	0.538072	TTGGC	2.86732	2978.5	1	TTGGC	2.86732	2978.5	1	CCCCC	1.63178	2299.94	19	ATCGC	2.65034	2753.1	5	TGGCA	2.26376	2351.53	14
Cyanothece PCC 7425	E-12	S-1221	0.506484	CGATC	3.41043	3372.56	1	CCAGG	2.48204	2518.96	3	TTTTT	2.09367	1915.45	26	CGATC	3.41043	3372.56	1	CCAGG	2.48204	2518.96	3
Acaryochloris marina MBIC11017	E-21	S-1222	0.469559	AAAAA	1.68757	2214.65	1	ATCAA	1.858	2158.44	3	AAAAA	1.68757	2214.65	1	ATCGC	1.55588	1416.36	133	AATTT	1.4642	1921.52	15
Pseudanabaena PCC 7367	F-2	S-2	0.462239	CGATC	6.9448	6198.52	1	ATCAA	2.2289	2692.56	5	TTTTT	1.69363	2380.22	17	CGATC	6.9448	6198.52	1	AAATT	1.86009	2614.17	7
Leptolyngbya PCC 6406	C3-1	T-11	0.551053	CCGCC	1.72602	2740.72	1	CCGCC	1.72602	2740.72	1	GGGGG	1.65723	2631.49	4	ATCGC	2.16239	2279.05	16	CCTGG	1.62496	2102.14	27
Leptolyngbya Heron Island J	C3-1x	T-12	0.480491	TTTTT	1.85552	2194.4	1	TGCTG	2.21542	2072.75	3	TTTTT	1.85552	2194.4	1	GCGAT	1.75113	1638.36	58	TGCCA	1.98387	1856.11	17
Geitlerinema PCC 7407	D-1	T-2	0.584631	GATCG	4.50937	4858.25	1	GCTGG	2.30799	3499.81	7	TTTTT	4.31576	1667.55	113	GATCG	4.50937	4858.25	1	GCAGC	2.19374	3326.56	9
Synechococcus PCC 7336	G-21	U-1	0.575433	GATCG	4.86408	5046.35	1	TCGCC	2.36962	2852.19	5	GGGGG	1.40206	1957.91	26	GATCG	4.86408	5046.35	1	GCTGC	1.89359	2279.22	9
Synechococcus os type A prime	G-11	V-1	0.602373	GATCC	4.18539	4519.97	1	GGCCA	2.24153	3667.19	3	CCCCC	1.00582	2492.87	42	GATCC	4.18539	4519.97	1	GCAGC	2.16316	3538.98	8
Synechococcus os type B prime	G-12	V-2	0.584503	GATCC	4.41798	4759.6	1	GGCCA	2.22552	3372.85	5	CCCCC	1.10153	2348.46	48	GATCC	4.41798	4759.6	1	GCAGC	2.08843	3165.08	9
Gloeobacter violaceus PCC 7421	H-1	W-1	0.619979	GGCGG	1.68273	4816.68	1	GGCGG	1.68273	4816.68	1	CCCCC	0.539591	1544.53	180	GATCG	2.0708	2227.08	70	GCCGC	1.6151	4623.08	3
Gloeobacter kilaueensis JS1	H-1x	W-2	0.605368	CCGCC	1.60661	4081.87	1	CCGCC	1.60661	4081.87	1	AAAAA	5.43673	1626.1	149	GATCG	2.98417	3221.94	9	CGCCG	1.49273	3792.55	3

## Sheet: Most frequent 6-mers
	Phylogeny			Top hexamer				Top non-excluded				Top mononucleotide repeat				Top excluded				Top palindrome
Organism	Shih	ML	GC%	6-mer	O/E	Counts/M	Rank	6-mer	O/E	Counts/M	Rank	6-mer	O/E	Counts/M	Rank	6-mer	O/E	Counts/M	Rank	6-mer	O/E	Counts/M	Rank
Trichodesmium erythraeum IMS101	A-111	P-111	0.341434	TTTTTT	2.36293	3012.09	1	AAAAAT	2.01978	2574.67	3	TTTTTT	2.36293	3012.09	1	GCGATC	5.07173	467.09	522	AAATTT	1.59242	2029.91	7
Lyngbya PCC 8106	A-1121	P-1121	0.411069	AAAATT	2.01202	1311.83	1	AAAATT	2.01202	1311.83	1	TTTTTT	1.85467	1209.23	5	GATCGC	4.47948	693.143	103	AAATTT	1.68511	1098.68	7
Arthrospira platensis NIES-39	A-112212	P-1122	0.436504	CGATCG	9.39143	1691.55	1	ATTTTT	1.89472	947.788	4	TTTTTT	1.70212	851.448	10	CGATCG	9.39143	1691.55	1	CGATCG	9.39143	1691.55	1
Oscillatoria nigro-viridis PCC 7112	A-1211	P-121	0.457845	CGATCG	12.3977	2501.98	1	AAAAAT	2.8662	1137.3	5	AAAAAA	2.91738	1157.6	4	CGATCG	12.3977	2501.98	1	CGATCG	12.3977	2501.98	1
Planktothrix rubescens niva-cya 407	A-1212x	P-122	0.386887	AATTTT	2.0028	1662.27	1	AATTTT	2.0028	1662.27	1	TTTTTT	1.66028	1377.99	10	GCGATC	5.02595	661.385	171	ATTAAT	1.71959	1427.22	7
Oscillatoria acuminata PCC 6304	A-22	P-2	0.476122	CGATCG	10.5783	2331.16	1	AATTTT	3.14546	1015.98	6	TTTTTT	2.79398	902.455	11	CGATCG	10.5783	2331.16	1	CGATCG	10.5783	2331.16	1
Dactylococcopsis salina PCC 8305	B2-111	Q-1111111	0.424384	CGATCG	13.4282	2254.95	1	AATTTT	2.07915	1181.7	2	AAAAAA	1.94839	1107.38	6	CGATCG	13.4282	2254.95	1	CGATCG	13.4282	2254.95	1
Halothece PCC 7418	B2-112	Q-1111112	0.429225	GATCGC	6.89267	1190.91	1	AAAAAT	1.93722	1046.62	4	AAAAAA	1.87433	1012.64	10	GATCGC	6.89267	1190.91	1	CGATCG	6.8068	1176.07	2
Microcystis aeruginosa NIES843	B2-2112211	Q-111112	0.423306	TTTTTT	2.61654	1503.9	1	AAAAAT	2.55877	1470.7	3	TTTTTT	2.61654	1503.9	1	CGATCG	6.3967	1067.3	20	CGATCG	6.3967	1067.3	20
Pleurocapsa PCC 7327	B2-21121	Q-111121	0.451933	CGATCG	13.0229	2549.72	1	AAAAAT	2.67218	1131.58	5	TTTTTT	2.67596	1133.19	4	CGATCG	13.0229	2549.72	1	CGATCG	13.0229	2549.72	1
Cyanothece PCC 7822	B2-2112221	Q-1111221	0.398958	AAAAAA	2.53796	1869.56	1	ATTTTT	2.37593	1750.2	3	AAAAAA	2.53796	1869.56	1	GCGATC	2.36222	337.799	824	AAATTT	2.0761	1529.34	7
Cyanothece PCC 7424	B2-2112222	Q-1111222	0.385098	TTTTTT	2.19083	1850.43	1	AAAATT	2.17006	1832.88	3	TTTTTT	2.19083	1850.43	1	CGATCG	6.4244	834.736	83	AAATTT	1.95329	1649.79	7
Epithemia turgida etsb endosymbiont	B2-21111x	Q-111211	0.334135	TTTTTT	2.1156	2881.2	1	ATTTTT	2.03466	2770.98	2	TTTTTT	2.1156	2881.2	1	GATCGC	2.33321	201.48	1657	TTTAAA	1.54617	2105.7	12
Candidatus atelocyanobacterium thalassa	B2-2111111	Q-1112121	0.311168	AAAAAT	1.6718	2790.54	1	AAAAAT	1.6718	2790.54	1	AAAAAA	1.65313	2759.37	2	GCGATC	1.20573	83.8063	2799	AATATT	1.31371	2192.82	11
Cyanothece CCY0110	B2-211111211	Q-11121211	0.366935	TTTTTT	1.78383	1794.4	1	AAAAAT	1.75357	1763.96	3	TTTTTT	1.78383	1794.4	1	GCGATC	5.99679	680.721	186	ATTAAT	1.46703	1475.72	11
Cyanothece ATCC 51142	B2-211111212x	Q-11121212	0.379419	AAAAAT	1.86294	1662.71	1	AAAAAT	1.86294	1662.71	1	AAAAAA	1.82539	1629.19	2	GATCGC	5.53489	690.245	161	ATTAAT	1.52253	1358.88	10
Crocosphaera watsonii WH8501	B2-211111222	Q-11121222	0.370982	AAAAAA	2.11065	2043.21	1	AAAAAT	1.96799	1905.11	3	AAAAAA	2.11065	2043.21	1	GCGATC	5.59515	655.134	206	AAATTT	1.32395	1281.65	21
Cyanothece PCC 8802	B2-2111121	Q-111221	0.398179	AATTTT	2.016	1496.66	1	AATTTT	2.016	1496.66	1	TTTTTT	1.85447	1376.75	5	GATCGC	6.38522	908.325	48	ATTAAT	1.70416	1265.16	9
Cyanothece PCC 8801	B2-2111122	Q-111222	0.397098	ATTTTT	2.03875	1529.95	1	ATTTTT	2.03875	1529.95	1	TTTTTT	1.84102	1381.57	5	GATCGC	6.27182	885.716	56	ATTAAT	1.71173	1284.54	9
Stanieria cyanosphaera PCC 7437	B2-2221	Q-112	0.524473	AATTAA	1.8532	1948.61	1	AATTAA	1.8532	1948.61	1	TTTTTT	1.85285	1948.25	2	GATCGC	9.92374	1085.85	47	AAATTT	1.57363	1654.65	10
Synechocystis PCC 6803	B2-21112	Q-121	0.473596	CGATCG	6.39051	1391.98	1	AAAATT	3.78861	1259.55	5	TTTTTT	3.3538	1115	11	CGATCG	6.39051	1391.98	1	CGATCG	6.39051	1391.98	1
Synechococcus PCC 7002	B2-22111	Q-1221	0.49187	GCGATC	8.49076	2005.02	1	ATTTTT	4.5926	1235.21	6	AAAAAA	4.53699	1220.26	7	GCGATC	8.49076	2005.02	1	CGATCG	7.59412	1793.29	5
Leptolyngbya PCC 7376	B2-22112	Q-1222	0.438674	GATCGC	8.68033	1582.54	1	AAAAAT	2.48577	1214.99	6	AAAAAA	2.47939	1211.87	7	GATCGC	8.68033	1582.54	1	CGATCG	7.78255	1418.86	5
Prochloron didemni P4-Papua New Guinea	B2-2212X	Q-21	0.418982	AATTTT	2.00528	1206.18	1	AATTTT	2.00528	1206.18	1	TTTTTT	1.96698	1183.14	2	GATCGC	4.74375	770.941	52	AAATTT	1.55446	935.012	15
Cyanobacterium stanieri PCC 7202	B2-22121	Q-2211	0.386647	AAAAAA	2.65797	2211.24	1	ATTTTT	2.43416	2025.05	3	AAAAAA	2.65797	2211.24	1	CGATCG	6.42242	843.717	97	AAATTT	1.64722	1370.37	17
Geminocystis herdmanii PCC 6308	B2-221221	Q-2212	0.537075	AAAAAT	2.02816	2554.29	1	AAAAAT	2.02816	2554.29	1	TTTTTT	1.94398	2448.27	3	CGATCG	20.6785	1926.39	14	AAATTT	1.53891	1938.12	13
Cyanobacterium aponinum PCC 10605	B2-221222	Q-222	0.349314	TTTTTT	1.98646	2355.77	1	ATTTTT	1.9802	2348.35	2	TTTTTT	1.98646	2355.77	1	CGATCG	8.92516	879.106	113	AAATTT	1.41959	1683.52	19
Oscillatoria PCC 10802	A-21	R-11	0.539447	TGCCGG	6.15237	2022.48	1	TGCCGG	6.15237	2022.48	1	TTTTTT	4.28639	639.137	79	GCGATC	1.39714	392.116	540	GCCGGC	4.92775	1897.4	5
Mastigocladopsis repens PCC 10914	B1-11112	R-1211	0.435719	ATTTTT	1.98479	1001.18	1	ATTTTT	1.98479	1001.18	1	AAAAAA	1.92508	971.062	5	GATCGC	3.37993	606.098	77	AAATTT	1.83916	927.721	7
Calothrix PCC 7103	B1-11121	R-1212111	0.385345	GGCGCC	30.0114	1535.34	1	ATTTTT	1.68266	1417.77	2	AAAAAA	1.44139	1214.48	8	GGCGCC	30.0114	1535.34	1	GGCGCC	30.0114	1535.34	1
Calothrix PCC 6303	B1-11122	R-1212112	0.397969	AAAAAT	1.89914	1412.85	1	AAAAAT	1.89914	1412.85	1	TTTTTT	1.57238	1169.76	6	CGATCG	5.73653	814.897	60	AAATTT	1.62935	1212.14	5
Chlorogloeopsis fritschii PCC 6912	B1-12x	R-12121211	0.414717	AAAATT	2.09644	1316.88	1	AAAATT	2.09644	1316.88	1	AAAAAA	1.68538	1058.66	9	CGATCG	7.89802	1250.44	6	AAATTT	2.05575	1291.31	4
Fischerella thermalis PCC 7521	B1-12y	R-12121212	0.410156	ATTTTT	2.08909	1374.86	1	ATTTTT	2.08909	1374.86	1	TTTTTT	1.74566	1148.84	6	GCGATC	7.2298	1112.24	8	AAATTT	1.97564	1300.19	5
Rivularia PCC 7116	B1-12	R-12121221	0.375316	AAAAAT	1.78353	1656.02	1	AAAAAT	1.78353	1656.02	1	TTTTTT	1.53577	1425.97	6	CGATCG	2.63152	318.372	974	AAATTT	1.54552	1435.02	5
Richelia intracellularis HH01	B1-12z	R-12121222	0.337117	AAAATA	1.49488	1981.96	1	AAAATA	1.49488	1981.96	1	TTTTTT	1.14517	1518.3	28	GCGATC	0.997792	88.4776	2924	AATATT	1.35188	1792.37	6
Nostoc PCC 7524	B1-1121111	R-121221111111	0.415311	AATTTT	1.96858	1228.93	1	AATTTT	1.96858	1228.93	1	AAAAAA	1.52274	950.606	13	GATCGC	6.15327	977.843	8	AAATTT	1.80288	1125.49	5
Anabaena PCC 7120	B1-11211121	R-12122111111211	0.412683	AAAATT	1.93281	1239.5	1	AAAATT	1.93281	1239.5	1	TTTTTT	1.54015	987.688	6	CGATCG	6.06617	948.308	11	AAATTT	1.74664	1120.11	5
Anabaena variabilis ATCC 29413	B1-11211122	R-12122111111212	0.414098	AAAATT	1.97041	1245.47	1	AAAATT	1.97041	1245.47	1	AAAAAA	1.55028	979.91	8	CGATCG	6.22376	981.599	7	AAATTT	1.75556	1109.66	5
Nostoc PCC 7107	B1-112112	R-1212211111122	0.403578	AAAATT	2.09421	1472.87	1	AAAATT	2.09421	1472.87	1	AAAAAA	1.67999	1181.55	6	CGATCG	7.40909	1092.45	12	AAATTT	1.91608	1347.59	5
Microchaete PCC 7126	B1-11212212	R-12122111112	0.422068	AATTTT	2.3796	1385.43	1	AATTTT	2.3796	1385.43	1	TTTTTT	1.99767	1163.07	6	CGATCG	6.44141	1066.8	8	AAATTT	2.17501	1266.32	5
Nostoc punctiforme ATCC 29133	B1-1121222	R-1212211112	0.413545	AATTTT	1.9053	1211.15	1	AATTTT	1.9053	1211.15	1	TTTTTT	1.61357	1025.7	9	CGATCG	7.4122	1165	5	CGATCG	7.4122	1165	5
Cylindrospermum stagnale PCC 7417	B1-11212111	R-121221112	0.422016	AAAATT	2.12478	1237.75	1	AAAATT	2.12478	1237.75	1	TTTTTT	1.86313	1085.33	6	GATCGC	5.11491	846.846	22	AAATTT	1.97297	1149.32	5
Anabaena PCC 7108	B1-1121211212	R-12122112	0.387742	AAAAAT	1.83607	1511.19	1	AAAAAT	1.83607	1511.19	1	TTTTTT	1.60533	1321.27	5	GCGATC	4.02386	532.723	289	AAATTT	1.60285	1319.24	7
Nodularia spumigena CCY9414	B1-1121212	R-1212212111	0.412658	AAAATT	2.086	1338.35	1	AAAATT	2.086	1338.35	1	TTTTTT	1.72832	1108.86	6	GCGATC	5.34369	835.174	39	AAATTT	1.90716	1223.61	5
Scytonema hofmanni UTEX 2349	B1-1121212y	R-1212212112	0.362232	CGATCG	8.30949	1288.26	1	ATTTTT	1.85797	1207.61	4	TTTTTT	1.76169	1145.03	8	CGATCG	8.30949	1288.26	1	CGATCG	8.30949	1288.26	1
Anabaena 90	B1-112121x	R-121221212	0.380965	AAAAAT	1.83791	1616.01	1	AAAAAT	1.83791	1616.01	1	AAAAAA	1.46364	1286.92	10	GATCGC	3.54026	446.503	509	AAATTT	1.49343	1313.12	9
Calothrix PCC 7507	B1-11212211	R-12122122	0.422472	AAAAAT	2.06219	1195.61	1	AAAAAT	2.06219	1195.61	1	AAAAAA	1.77018	1026.31	9	CGATCG	7.07985	1175.39	4	CGATCG	7.07985	1175.39	4
Anabaena cylindrica PCC 7122	B1-1121211211	R-1212221	0.387906	AAAAAT	1.83745	1509.92	1	AAAAAT	1.83745	1509.92	1	AAAAAA	1.57316	1292.74	6	GATCGC	4.78211	633.841	167	AAATTT	1.65603	1360.84	5
Raphidiopsis brookii d9	B1-11212112211	R-121222211	0.400568	ATTTTT	1.77188	1284.48	1	ATTTTT	1.77188	1284.48	1	TTTTTT	1.58616	1149.85	5	GCGATC	3.54767	512.787	280	AAATTT	1.5156	1098.69	7
Cylindrospermopsis raciborskii CS-505	B1-11212112212	R-121222212	0.402342	ATTTTT	1.75743	1251.6	1	ATTTTT	1.75743	1251.6	1	TTTTTT	1.53481	1093.06	5	GCGATC	4.03666	590.354	168	AAATTT	1.49246	1062.89	6
Nostoc azollae-0708	B1-1121211222	R-12122222	0.383737	AAAAAT	1.64133	1404.81	1	AAAAAT	1.64133	1404.81	1	TTTTTT	1.36852	1171.31	8	GCGATC	2.71279	349.061	911	AAATTT	1.40068	1198.84	6
Gloeocapsa PCC 7428	B1-221	R-12211	0.432694	CGATCG	10.8074	1905.02	1	AAAATT	1.85293	965.12	4	AAAAAA	1.57934	822.617	10	CGATCG	10.8074	1905.02	1	CGATCG	10.8074	1905.02	1
Chroococcidiopsis thermalis PCC 7203	B1-222	R-12212	0.444747	CGATCG	14.8241	2793.97	1	AAAATT	2.27582	1042.1	4	TTTTTT	1.70058	778.694	18	CGATCG	14.8241	2793.97	1	CGATCG	14.8241	2793.97	1
Microcoleus PCC 7113	B3-2	R-1222	0.462133	CGATCG	4.91504	1013.37	1	ATTTTT	2.1284	805.246	4	AAAAAA	2.03185	768.718	8	CGATCG	4.91504	1013.37	1	CGATCG	4.91504	1013.37	1
Crinalium epipsammum PCC 9333	B4-1	R-211	0.401626	AATTTT	1.92697	1382.11	1	AATTTT	1.92697	1382.11	1	TTTTTT	1.58663	1138	9	GATCGC	7.85697	1143.69	8	AAATTT	1.78111	1277.49	6
Oscillatoriales cyanobacterium JSC-12	B4-1x	R-212	0.474716	CGATCG	8.25999	1808.52	1	TGGCAA	3.36222	814.575	4	TTTTTT	1.47799	485.129	189	CGATCG	8.25999	1808.52	1	CGATCG	8.25999	1808.52	1
Chamaesiphon minutus PCC 6605	B4-2	R-22	0.456701	CGATCG	21.48	4309.82	1	ATCGAT	6.90781	1961.47	4	TTTTTT	1.50892	606.351	91	CGATCG	21.48	4309.82	1	CGATCG	21.48	4309.82	1
Prochlorococcus marinus NATL2a	C1-2111111	S-1111111111	0.35123	TTTTTT	2.04175	2378.86	1	AAAAAT	1.74043	2027.78	3	TTTTTT	2.04175	2378.86	1	GATCGC	0.742763	74.3394	3266	ATTAAT	1.34176	1563.3	12
Prochlorococcus marinus NATL1a	C1-2111112	S-1111111112	0.349793	TTTTTT	2.0521	2422.87	1	AAAAAT	1.7069	2015.3	3	TTTTTT	2.0521	2422.87	1	GATCGC	0.791715	78.2955	3188	ATTAAT	1.3231	1562.16	13
Prochlorococcus marinus SS120	C1-211122	S-111111112111	0.364421	TTTTTT	1.5408	1587.02	1	ATTTTT	1.35229	1392.85	3	TTTTTT	1.5408	1587.02	1	GATCGC	0.728462	81.0928	3206	ATTAAT	1.34563	1386	4
Prochlorococcus marinus MED4	C1-21111211	S-111111112112	0.307992	TTTTTT	2.10866	3618.24	1	ATTTTT	1.85628	3185.18	3	TTTTTT	2.10866	3618.24	1	TTTAAA	1.49248	2560.93	8	TTTAAA	1.49248	2560.93	8
Prochlorococcus marinus MIT9515	C1-21111212	S-11111111212	0.307942	AAAAAA	2.24752	3858.17	1	AAAAAT	1.87082	3211.52	3	AAAAAA	2.24752	3858.17	1	AAATTT	1.50028	2575.44	7	AAATTT	1.50028	2575.44	7
Prochlorococcus marinus AS9601	C1-2111122111	S-11111111221	0.313215	TTTTTT	2.36158	3872.12	1	AAAAAT	2.04456	3352.32	3	TTTTTT	2.36158	3872.12	1	AAATTT	1.59496	2615.15	8	AAATTT	1.59496	2615.15	8
Prochlorococcus marinus MIT9301	C1-2111122112	S-111111112221	0.313399	TTTTTT	2.42844	3975.32	1	AAAAAT	2.04112	3341.29	3	TTTTTT	2.42844	3975.32	1	AAATTT	1.59726	2614.69	9	AAATTT	1.59726	2614.69	9
Prochlorococcus marinus MIT9312	C1-21111222	S-111111112222	0.312105	TTTTTT	2.24364	3714.59	1	AAAAAT	1.9362	3205.59	3	TTTTTT	2.24364	3714.59	1	AAATTT	1.50542	2492.39	9	AAATTT	1.50542	2492.39	9
Prochlorococcus marinus MIT9211	C1-211121	S-11111112	0.396825	TTTTTT	1.75771	1323	1	TTCTTT	2.44576	1210.98	3	TTTTTT	1.75771	1323	1	GATCGC	1.01465	143.012	2665	ATTAAT	1.50919	1135.94	5
Prochlorococcus marinus MIT9313	C1-21121	S-1111112	0.507398	CAGCAA	3.92549	957.744	1	CAGCAA	3.92549	957.744	1	AAAAAA	2.12173	473.687	280	GATCGC	1.80236	452.948	340	TGATCA	3.61961	857.366	5
Prochlorococcus marinus MIT9303	C1-21122	S-111112	0.500076	TGATCA	3.55402	867.418	1	TGATCA	3.55402	867.418	1	TTTTTT	1.97752	482.354	233	GCGATC	1.75837	429.422	387	TGATCA	3.55402	867.418	1
Synechococcus WH8102	C1-212111	S-11112111111	0.592176	CTGCTG	4.93113	1581.48	1	CTGCTG	4.93113	1581.48	1	CCCCCC	0.374184	257.145	1596	GCGATC	2.29009	734.464	121	CAGCTG	3.67977	1180.15	6
Synechococcus BL107	C1-212121	S-1111211111121	0.54205	TTGATC	4.04866	817.493	1	TTGATC	4.04866	817.493	1	AAAAAA	3.05778	440.694	367	GATCGC	2.10857	596.49	71	TGATCA	3.51549	709.836	11
Synechococcus CC9902	C1-212122	S-1111211111122	0.597981	GATCAA	4.16657	843.018	1	GATCAA	4.16657	843.018	1	TTTTTT	3.10994	450.594	349	GCGATC	2.15383	608.548	64	TGATCA	3.47435	702.962	12
Synechococcus CC9605	C1-2121121	S-11112111112	0.541645	CTGCTG	4.4657	1427.12	1	CTGCTG	4.4657	1427.12	1	AAAAAA	3.87843	278.811	1447	GCGATC	2.1213	677.91	149	CAGCTG	3.42	1092.94	6
Synechococcus RS9916	C1-212221	S-11112111121	0.643252	CTGCTG	4.28134	1382.43	1	CTGCTG	4.28134	1382.43	1	CCCCCC	0.321462	229.654	1867	GCGATC	2.30105	743	103	CAGCTG	2.96463	957.269	22
Synechococcus RS9917	C1-212222	S-11112111122	0.411368	GGCGGC	1.72023	1904.12	1	GGCGGC	1.72023	1904.12	1	GGGGGG	0.255133	282.407	1287	CGATCG	3.62814	1235.24	41	GCCGGC	1.32774	1469.68	8
Synechococcus RCC307	C1-1	S-111121112	0.608435	CAGCAG	5.86067	1924.12	1	CAGCAG	5.86067	1924.12	1	AAAAAA	3.63119	204.502	1796	TGATCA	5.84719	795.087	167	CAGCTG	4.05633	1331.74	12
Synechococcus CC9311	C1-2122121	S-11112112	0.342759	TTGCTG	3.35206	812.507	1	TTGCTG	3.35206	812.507	1	TTTTTT	2.46313	444.999	332	GATCGC	2.23852	598.447	50	TGATCA	3.44223	756.498	6
Synechococcus WH7805	C1-2122111	S-11112121	0.554378	CTGCTG	3.66671	1132.32	1	CTGCTG	3.66671	1132.32	1	AAAAAA	2.60964	238.825	1936	GATCGC	2.45354	757.678	36	CTGCAG	2.85999	883.195	8
Synechococcus WH7803	C1-2122112	S-11112122	0.60236	CTGCTG	3.96557	1289.83	1	CTGCTG	3.96557	1289.83	1	GGGGGG	0.315281	235.321	1878	GATCGC	2.89787	942.551	23	CTGCAG	2.96671	964.943	19
Synechococcus WH5701	C1-221	S-11112211	0.660416	GGCGGC	1.67306	2168.88	1	GGCGGC	1.67306	2168.88	1	GGGGGG	0.366217	474.748	577	CGATCG	3.00783	1030.95	120	GCCGGC	1.38127	1790.62	9
Cyanobium gracile PCC 6307	C1-22221	S-11112212	0.687072	GCCGCC	1.93812	3185.77	1	GCCGCC	1.93812	3185.77	1	CCCCCC	0.452678	744.084	317	GATCGC	2.75084	937.959	201	GCCGGC	1.6074	2642.14	3
Paulinella chromatophora chromatophore	C1-2222x	S-1111222	0.379874	TTAATT	1.5697	1394.85	1	TTAATT	1.5697	1394.85	1	TTTTTT	1.31965	1172.65	9	GCGATC	1.1187	139.974	2779	ATTAAT	1.52233	1352.76	2
Synechococcus elongatus PCC 7942	C2-1	S-11121	0.594126	CGATCG	16.5227	4842.36	1	GGCGAT	5.66016	1658.85	4	AAAAAA	1.94651	238.173	1731	CGATCG	16.5227	4842.36	1	CGATCG	16.5227	4842.36	1
Synechococcus elongatus PCC 6301	C2-2	S-11122	0.554843	CGATCG	16.5078	4844.13	1	ATCGCC	5.67996	1666.76	4	TTTTTT	1.96741	239.221	1726	CGATCG	16.5078	4844.13	1	CGATCG	16.5078	4844.13	1
Prochlorothrix hollandica PCC 9006	C22-1	S-112	0.541926	CGATCG	10.5037	2970.24	1	CCCTGG	4.04194	1352.2	4	GGGGGG	3.05588	1209.46	6	CGATCG	10.5037	2970.24	1	CGATCG	10.5037	2970.24	1
Thermosynechococcus elongatus BP1	E-111	S-1211	0.539179	GATCGC	6.676	1872.12	1	ATCGCC	4.41721	1238.7	4	GGGGGG	1.57265	603.734	108	GATCGC	6.676	1872.12	1	CGATCG	6.64438	1863.25	3
Thermosynechococcus NK55a	E-112x	S-1212	0.538072	GATCGC	6.73174	1881.3	1	ATCGCC	4.48404	1253.14	4	GGGGGG	1.59795	605.937	107	GATCGC	6.73174	1881.3	1	CGATCG	6.64228	1856.3	3
Cyanothece PCC 7425	E-12	S-1221	0.506484	CGATCG	9.33876	2338.7	1	CCCTGG	3.38985	871.224	4	TTTTTT	2.17649	491.349	219	CGATCG	9.33876	2338.7	1	CGATCG	9.33876	2338.7	1
Acaryochloris marina MBIC11017	E-21	S-1222	0.469559	ATTTTT	1.90838	664.227	1	ATTTTT	1.90838	664.227	1	TTTTTT	1.74551	607.539	15	GATCGC	2.63222	562.572	35	AATATT	1.5981	556.233	40
Pseudanabaena PCC 7367	F-2	S-2	0.462239	CGATCG	22.0056	4539.39	1	GGCGAT	7.86537	1622.5	4	TTTTTT	1.69372	640.034	96	CGATCG	22.0056	4539.39	1	CGATCG	22.0056	4539.39	1
Leptolyngbya PCC 6406	C3-1	T-11	0.551053	GATCGC	4.72168	1371.14	1	CCGCCA	2.48844	886.972	4	GGGGGG	1.57867	690.675	45	GATCGC	4.72168	1371.14	1	CGATCG	4.40098	1278.01	3
Leptolyngbya Heron Island J	C3-1x	T-12	0.480491	GCGATC	3.3317	748.868	1	CAGCTG	3.19543	718.239	3	TTTTTT	1.84636	567.201	30	GCGATC	3.3317	748.868	1	CAGCTG	3.19543	718.239	3
Geitlerinema PCC 7407	D-1	T-2	0.584631	CGATCG	11.4005	3590.39	1	CAGCAG	4.09706	1290.29	6	TTTTTT	4.93819	396.273	590	CGATCG	11.4005	3590.39	1	CGATCG	11.4005	3590.39	1
Synechococcus PCC 7336	G-21	U-1	0.575433	CGATCG	13.4765	3754.56	1	ATCGCC	6.14212	1711.19	4	GGGGGG	1.2737	477.634	191	CGATCG	13.4765	3754.56	1	CGATCG	13.4765	3754.56	1
Synechococcus os type A prime	G-11	V-1	0.602373	GGATCC	8.73763	2842.03	1	GGCGGC	1.80246	1345.49	4	CCCCCC	0.834995	623.302	251	GGATCC	8.73763	2842.03	1	GGATCC	8.73763	2842.03	1
Synechococcus os type B prime	G-12	V-2	0.584503	GGATCC	10.0787	3173.29	1	CAGCAG	3.9041	1229.21	4	GGGGGG	0.932929	581.288	255	GGATCC	10.0787	3173.29	1	GGATCC	10.0787	3173.29	1
Gloeobacter violaceus PCC 7421	H-1	W-1	0.619979	GCCGCC	2.26535	2010.08	1	GCCGCC	2.26535	2010.08	1	AAAAAA	7.73039	363.81	782	CGATCG	2.23726	745.865	152	CGGCCG	1.38098	1225.37	8
Gloeobacter kilaueensis JS1	H-1x	W-2	0.605368	GCCGCC	2.11974	1630.12	1	GCCGCC	2.11974	1630.12	1	AAAAAA	7.57781	447.216	550	CGATCG	3.75956	1228.63	7	CGATCG	3.75956	1228.63	7

## Sheet: Most frequent 8-mers
	Phylogeny			Top octamer				Top mononucleotide repeat				Top palindrome
Organism	Shih	ML	GC%	8-mer	OE	Counts/M	Rank	8-mer	O/E	Counts/M	Rank	8-mer	O/E	Counts/M	Rank
Trichodesmium erythraeum IMS101	A-111	P-111	0.341434	AAAAAAAT	2.97615	3188	1	AAAAAAAA	2.90146	3108	3	GCGATCGC	139.794	2908	7
Lyngbya PCC 8106	A-1121	P-1121	0.411069	GCGATCGC	65.9113	3032	1	AAAAAAAA	1.00032	398	1263	GCGATCGC	65.9113	3032	1
Arthrospira platensis NIES-39	A-112212	P-1122	0.436504	GCGATCGC	131.914	7683	1	AAAAAAAA	1.35775	366	704	GCGATCGC	131.914	7683	1
Oscillatoria nigro-viridis PCC 7112	A-1211	P-121	0.457845	GCGATCGC	59.5406	5209	1	AAAAAAAA	2.86069	690	120	GCGATCGC	59.5406	5209	1
Planktothrix rubescens niva-cya 407	A-1212x	P-122	0.386887	GCGATCGC	256.801	2772	1	TTTTTTTT	38.9093	420	737	GCGATCGC	256.801	2772	1
Oscillatoria acuminata PCC 6304	A-22	P-2	0.476122	GCGATCGC	103.634	10101	1	AAAAAAAA	2.15083	372	1168	GCGATCGC	103.634	10101	1
Dactylococcopsis salina PCC 8305	B2-111	Q-1111111	0.424384	CGATCGCG	65.6219	1876	1	AAAAAAAA	1.2977	231	1039	GCGATCGC	56.2473	1608	3
Halothece PCC 7418	B2-112	Q-1111112	0.429225	CGATCGCG	92.4301	3074	1	AAAAAAAA	0.826557	152	4526	GCGATCGC	89.1526	2965	3
Microcystis aeruginosa NIES843	B2-2112211	Q-111112	0.423306	GCGATCGC	41.6975	1821	1	AAAAAAAA	1.56151	436	548	GCGATCGC	41.6975	1821	1
Pleurocapsa PCC 7327	B2-21121	Q-111121	0.451933	GCGATCGC	123.843	6174	1	AAAAAAAA	1.98005	314	452	GCGATCGC	123.843	6174	1
Cyanothece PCC 7822	B2-2112221	Q-1111221	0.398958	AAAAAATT	3.52494	1839	1	AAAAAAAA	2.18512	1140	50	AAAATTTT	3.46743	1809	3
Cyanothece PCC 7424	B2-2112222	Q-1111222	0.385098	GCGATCGC	78.7069	2485	1	AAAAAAAA	1.73902	910	103	GCGATCGC	78.7069	2485	1
Epithemia turgida etsb endosymbiont	B2-21111x	Q-111211	0.334135	AAAAAATA	3.35448	1415	1	AAAAAAAA	1.71873	725	71	TTTTAAAA	3.26202	1376	3
Candidatus atelocyanobacterium thalassa	B2-2111111	Q-1112121	0.311168	AAAAAATA	2.16877	620	1	AAAAAAAA	0.975945	279	195	AAATATTT	1.78399	510	15
Cyanothece CCY0110	B2-211111211	Q-11121211	0.366935	GCGATCGC	125.201	2813	1	AAAAAAAA	1.18442	702	226	GCGATCGC	125.201	2813	1
Cyanothece ATCC 51142	B2-211111212x	Q-11121212	0.379419	GCGATCGC	105.643	2589	1	AAAAAAAA	1.22969	577	238	GCGATCGC	105.643	2589	1
Crocosphaera watsonii WH8501	B2-211111222	Q-11121222	0.370982	GCGATCGC	117.216	2937	1	AAAAAAAA	1.69564	1010	49	GCGATCGC	117.216	2937	1
Cyanothece PCC 8802	B2-2111121	Q-111221	0.398179	GCGATCGC	112.394	3044	1	AAAAAAAA	0.966267	312	950	GCGATCGC	112.394	3044	1
Cyanothece PCC 8801	B2-2111122	Q-111222	0.397098	GCGATCGC	110.972	2827	1	AAAAAAAA	0.929321	290	1066	GCGATCGC	110.972	2827	1
Stanieria cyanosphaera PCC 7437	B2-2221	Q-112	0.524473	GCGATCGC	227.863	4535	1	AAAAAAAA	1.6563	982	56	GCGATCGC	227.863	4535	1
Synechocystis PCC 6803	B2-21112	Q-121	0.473596	CGATCGCG	86.1986	4166	1	AAAAAAAA	2.10681	192	1800	GCGATCGC	70.0597	3386	3
Synechococcus PCC 7002	B2-22111	Q-1221	0.49187	GCGATCGC	114.695	5586	1	AAAAAAAA	2.75333	163	1307	GCGATCGC	114.695	5586	1
Leptolyngbya PCC 7376	B2-22112	Q-1222	0.438674	GCGATCGC	144.043	6476	1	AAAAAAAA	1.70247	336	366	GCGATCGC	144.043	6476	1
Prochloron didemni P4-Papua New Guinea	B2-2212X	Q-21	0.418982	GCGATCGC	68.6586	2784	1	AAAAAAAA	1.72484	498	215	GCGATCGC	68.6586	2784	1
Cyanobacterium stanieri PCC 7202	B2-22121	Q-2211	0.386647	GCGATCGC	132.89	2064	1	AAAAAAAA	2.04433	506	79	GCGATCGC	132.89	2064	1
Geminocystis herdmanii PCC 6308	B2-221221	Q-2212	0.537075	TCGATCGA	70.037	3004	1	AAAAAAAA	1.33138	772	164	TCGATCGA	70.037	3004	1
Cyanobacterium aponinum PCC 10605	B2-221222	Q-222	0.349314	GCGATCGC	177.127	2223	1	AAAAAAAA	1.37319	720	142	GCGATCGC	177.127	2223	1
Oscillatoria PCC 10802	A-21	R-11	0.539447	CACCGGCA	23.1114	5564	1	AAAAAAAA	1.53688	370	2111	TGCCGGCA	11.4684	2761	9
Mastigocladopsis repens PCC 10914	B1-11112	R-1211	0.435719	GCGATCGC	55.4443	2820	1	AAAAAAAA	1.47525	354	325	GCGATCGC	55.4443	2820	1
Calothrix PCC 7103	B1-11121	R-1212111	0.385345	TGGCGCCA	44.1803	2473	1	AAAAAAAA	0.741944	684	1305	TGGCGCCA	44.1803	2473	1
Calothrix PCC 6303	B1-11122	R-1212112	0.397969	GCGATCGC	121.816	4769	1	AAAAAAAA	0.837602	393	1407	GCGATCGC	121.816	4769	1
Chlorogloeopsis fritschii PCC 6912	B1-12x	R-12121211	0.414717	GCGATCGC	134.019	7031	1	AAAAAAAA	0.771837	320	2805	GCGATCGC	134.019	7031	1
Fischerella thermalis PCC 7521	B1-12y	R-12121212	0.410156	GCGATCGC	137.377	4833	1	AAAAAAAA	0.87383	272	1754	GCGATCGC	137.377	4833	1
Rivularia PCC 7116	B1-12	R-12121221	0.375316	GCGATCGC	60.1521	2237	1	AAAAAAAA	0.939699	743	559	GCGATCGC	60.1521	2237	1
Richelia intracellularis HH01	B1-12z	R-12121222	0.337117	AAAAAATA	1.83297	866	1	AAAAAAAA	0.548197	259	1107	AAATATTT	1.75042	827	7
Nostoc PCC 7524	B1-1121111	R-121221111111	0.415311	GCGATCGC	122.109	5622	1	AAAAAAAA	0.764343	274	2960	GCGATCGC	122.109	5622	1
Anabaena PCC 7120	B1-11211121	R-12122111111211	0.412683	GCGATCGC	118.642	5695	1	AAAAAAAA	0.742181	296	2880	GCGATCGC	118.642	5695	1
Anabaena variabilis ATCC 29413	B1-11211122	R-12122111111212	0.414098	GCGATCGC	118.913	5713	1	AAAAAAAA	0.705648	272	3536	GCGATCGC	118.913	5713	1
Nostoc PCC 7107	B1-112112	R-1212211111122	0.403578	GCGATCGC	152.855	5809	1	AAAAAAAA	0.823443	326	1708	GCGATCGC	152.855	5809	1
Microchaete PCC 7126	B1-11212212	R-12122111112	0.422068	GCGATCGC	120.731	5106	1	AAAAAAAA	1.16947	326	1004	GCGATCGC	120.731	5106	1
Nostoc punctiforme ATCC 29133	B1-1121222	R-1212211112	0.413545	GCGATCGC	123.987	7548	1	AAAAAAAA	0.771489	382	2554	GCGATCGC	123.987	7548	1
Cylindrospermum stagnale PCC 7417	B1-11212111	R-121221112	0.422016	GCGATCGC	93.3648	5238	1	AAAAAAAA	1.20455	446	746	GCGATCGC	93.3648	5238	1
Anabaena PCC 7108	B1-1121211212	R-12122112	0.387742	GCGATCGC	90.3983	2648	1	AAAAAAAA	0.867724	394	942	GCGATCGC	90.3983	2648	1
Nodularia spumigena CCY9414	B1-1121212	R-1212212111	0.412658	GCGATCGC	112.187	3968	1	AAAAAAAA	1.13538	334	750	GCGATCGC	112.187	3968	1
Scytonema hofmanni UTEX 2349	B1-1121212y	R-1212212112	0.362232	GCGATCGC	155.775	8310	1	AAAAAAAA	1.00236	459	1015	GCGATCGC	155.775	8310	1
Anabaena 90	B1-112121x	R-121221212	0.380965	GCGATCGC	84.1866	2044	1	AAAAAAAA	0.639931	286	2291	GCGATCGC	84.1866	2044	1
Calothrix PCC 7507	B1-11212211	R-12122122	0.422472	GCGATCGC	124.09	6456	1	AAAAAAAA	0.948358	322	1794	GCGATCGC	124.09	6456	1
Anabaena cylindrica PCC 7122	B1-1121211211	R-1212221	0.387906	GCGATCGC	105.46	3714	1	AAAAAAAA	0.757829	412	1485	GCGATCGC	105.46	3714	1
Raphidiopsis brookii d9	B1-11212112211	R-121222211	0.400568	GCGATCGC	73.7205	1362	1	AAAAAAAA	0.905987	188	984	GCGATCGC	73.7205	1362	1
Cylindrospermopsis raciborskii CS-505	B1-11212112212	R-121222212	0.402342	GCGATCGC	81.4987	1871	1	AAAAAAAA	0.77827	192	1821	GCGATCGC	81.4987	1871	1
Nostoc azollae-0708	B1-1121211222	R-12122222	0.383737	GCGATCGC	42.9828	1117	1	AAAAAAAA	0.785064	350	1020	GCGATCGC	42.9828	1117	1
Gloeocapsa PCC 7428	B1-221	R-12211	0.432694	GCGATCGC	164.843	7387	1	AAAAAAAA	0.852293	194	3862	GCGATCGC	164.843	7387	1
Chroococcidiopsis thermalis PCC 7203	B1-222	R-12212	0.444747	GCGATCGC	161.294	10056	1	AAAAAAAA	0.775122	183	7404	GCGATCGC	161.294	10056	1
Microcoleus PCC 7113	B3-2	R-1222	0.462133	GCGATCGC	65.5102	5745	1	AAAAAAAA	1.4542	317	1248	GCGATCGC	65.5102	5745	1
Crinalium epipsammum PCC 9333	B4-1	R-211	0.401626	GCGATCGC	154.373	5093	1	AAAAAAAA	1.04753	378	651	GCGATCGC	154.373	5093	1
Oscillatoriales cyanobacterium JSC-12	B4-1x	R-212	0.474716	GCGATCGC	98.929	6749	1	AAAAAAAA	0.566997	71	33294	GCGATCGC	98.929	6749	1
Chamaesiphon minutus PCC 6605	B4-2	R-22	0.456701	TCGATCGA	50.6212	5068	1	AAAAAAAA	0.578522	116	21018	TCGATCGA	50.6212	5068	1
Prochlorococcus marinus NATL2a	C1-2111111	S-1111111111	0.35123	AAAAAAAT	2.39887	542	1	AAAAAAAA	1.96513	444	15	AATTAATT	1.85448	419	29
Prochlorococcus marinus NATL1a	C1-2111112	S-1111111112	0.349793	AAAAAAAT	2.312	538	1	AAAAAAAA	1.89945	442	25	TTTTAAAA	1.92523	448	17
Prochlorococcus marinus SS120	C1-211122	S-111111112111	0.364421	AATTAATT	1.9325	352	1	AAAAAAAA	1.06507	194	222	AATTAATT	1.9325	352	1
Prochlorococcus marinus MED4	C1-21111211	S-111111112112	0.307992	AAAAAAAT	2.37232	808	1	AAAAAAAA	1.97889	674	26	TTTTAAAA	2.26369	771	13
Prochlorococcus marinus MIT9515	C1-21111212	S-11111111212	0.307942	AAAAAAAT	2.45233	859	1	AAAAAAAA	2.27247	796	13	TTTTAAAA	2.21823	777	19
Prochlorococcus marinus AS9601	C1-2111122111	S-11111111221	0.313215	AAAAAAAT	2.81854	910	1	AAAAAAAA	2.23625	722	17	TTTTAAAA	2.17121	701	23
Prochlorococcus marinus MIT9301	C1-2111122112	S-111111112221	0.313399	AAAAAAAT	2.84756	902	1	AAAAAAAA	2.2951	727	17	TTTTAAAA	2.26353	717	21
Prochlorococcus marinus MIT9312	C1-21111222	S-111111112222	0.312105	AAAAAAAT	2.60182	871	1	AAAAAAAA	2.13284	714	18	TTTTAAAA	2.31506	775	13
Prochlorococcus marinus MIT9211	C1-211121	S-11111112	0.396825	AAAAGAAA	3.51338	291	1	AAAAAAAA	1.50109	189	88	AATTAATT	2.24766	283	3
Prochlorococcus marinus MIT9313	C1-21121	S-1111112	0.507398	CAGCAGCA	7.73927	293	1	AAAAAAAA	1.77632	58	10450	TTGATCAA	6.63922	230	7
Prochlorococcus marinus MIT9303	C1-21122	S-111112	0.500076	CAGCAGCA	8.01037	328	1	AAAAAAAA	1.66321	68	9070	TTGATCAA	6.06215	248	13
Synechococcus WH8102	C1-212111	S-11112111111	0.592176	CAGCAGCA	12.8113	603	1	AAAAAAAA	3.85545	27	31203	GCTGCAGC	6.95222	479	7
Synechococcus BL107	C1-212121	S-1111211111121	0.54205	CACCACCA	6.60604	265	1	AAAAAAAA	3.64872	63	8531	GCCATGGC	5.15989	245	3
Synechococcus CC9902	C1-212122	S-1111211111122	0.597981	CACCACCA	6.60868	259	1	AAAAAAAA	3.29281	56	10740	GCCATGGC	4.77194	221	7
Synechococcus CC9605	C1-2121121	S-11112111112	0.541645	CAGCAGCA	11.8905	576	1	AAAAAAAA	5.1968	39	23846	GCTGCAGC	6.42596	452	7
Synechococcus RS9916	C1-212221	S-11112111121	0.643252	CCACCACC	9.62005	740	1	AAAAAAAA	3.66068	26	33695	GCTGCAGC	5.49903	423	23
Synechococcus RS9917	C1-212222	S-11112111122	0.411368	CCACCACC	8.19446	746	1	CCCCCCCC	0.128388	38	21290	GCTGCAGC	6.28315	572	25
Synechococcus RCC307	C1-1	S-111121112	0.608435	GCAGCAGC	13.0763	884	1	AAAAAAAA	4.58047	22	29352	GCTGCAGC	10.9167	738	5
Synechococcus CC9311	C1-2122121	S-11112112	0.342759	CAGCAGCA	6.62813	288	1	AAAAAAAA	2.10343	56	14761	GCTGCAGC	4.40284	211	13
Synechococcus WH7805	C1-2122111	S-11112121	0.554378	CAGCAGCA	8.05035	398	1	CCCCCCCC	0.194984	24	39008	GCTGCAGC	4.96967	333	7
Synechococcus WH7803	C1-2122112	S-11112122	0.60236	GCAGCAGC	6.58694	460	1	AAAAAAAA	4.1528	24	33081	GCTGCAGC	5.32683	372	7
Synechococcus WH5701	C1-221	S-11112211	0.660416	CCAGCAGC	10.7853	1153	1	CCCCCCCC	0.133554	54	15713	GCTGCAGC	6.4637	691	51
Cyanobium gracile PCC 6307	C1-22221	S-11112212	0.687072	CCGCCGCC	3.12009	2023	1	CCCCCCCC	0.197415	128	6584	CGGCGCCG	1.9757	1281	23
Paulinella chromatophora chromatophore	C1-2222x	S-1111222	0.379874	AATTAATT	2.63524	230	1	AAAAAAAA	1.32908	116	101	AATTAATT	2.63524	230	1
Synechococcus elongatus PCC 7942	C2-1	S-11121	0.594126	GCGATCGC	121.37	7516	1	AAAAAAAA	0.718318	12	56149	GCGATCGC	121.37	7516	1
Synechococcus elongatus PCC 6301	C2-2	S-11122	0.554843	GCGATCGC	120.802	7356	1	AAAAAAAA	0.73883	12	55773	GCGATCGC	120.802	7356	1
Prochlorothrix hollandica PCC 9006	C22-1	S-112	0.541926	CGATCGCG	36.2709	4252	1	CCCCCCCC	3.23026	530	220	GCGATCGC	34.2236	4012	3
Thermosynechococcus elongatus BP1	E-111	S-1211	0.539179	GCGATCGC	69.6305	3681	1	CCCCCCCC	0.759975	55	14470	GCGATCGC	69.6305	3681	1
Thermosynechococcus NK55a	E-112x	S-1212	0.538072	GCGATCGC	69.6214	3549	1	CCCCCCCC	0.607232	42	21855	GCGATCGC	69.6214	3549	1
Cyanothece PCC 7425	E-12	S-1221	0.506484	GCGATCGC	38.428	3571	1	CCCCCCCC	1.53259	150	9197	GCGATCGC	38.428	3571	1
Acaryochloris marina MBIC11017	E-21	S-1222	0.469559	GCGATCGC	24.1813	2382	1	AAAAAAAA	1.07464	220	7128	GCGATCGC	24.1813	2382	1
Pseudanabaena PCC 7367	F-2	S-2	0.462239	GCGATCGC	110.747	5962	1	AAAAAAAA	0.996423	133	8867	GCGATCGC	110.747	5962	1
Leptolyngbya PCC 6406	C3-1	T-11	0.551053	GCGATCGC	27.8574	5345	1	GGGGGGGG	1.37072	263	1613	GCGATCGC	27.8574	5345	1
Leptolyngbya Heron Island J	C3-1x	T-12	0.480491	GCGATCGC	42.8333	3833	1	AAAAAAAA	1.94443	174	12366	GCGATCGC	42.8333	3833	1
Geitlerinema PCC 7407	D-1	T-2	0.584631	GCGATCGC	95.1177	11982	1	AAAAAAAA	2.16014	35	42907	GCGATCGC	95.1177	11982	1
Synechococcus PCC 7336	G-21	U-1	0.575433	GCGATCGC	81.6574	8312	1	CCCCCCCC	0.985316	135	7763	GCGATCGC	81.6574	8312	1
Synechococcus os type A prime	G-11	V-1	0.602373	GGGATCCC	39.3028	3401	1	CCCCCCCC	0.312196	62	14589	GGGATCCC	39.3028	3401	1
Synechococcus os type B prime	G-12	V-2	0.584503	GGGATCCC	50.0303	4099	1	CCCCCCCC	0.388558	63	15403	GGGATCCC	50.0303	4099	1
Gloeobacter violaceus PCC 7421	H-1	W-1	0.619979	CCGCCGCC	4.65702	1850	1	CCCCCCCC	0.186281	74	20485	CCGGCCGG	1.55066	616	123
Gloeobacter kilaueensis JS1	H-1x	W-2	0.605368	CCGCCGCC	3.88117	1292	1	AAAAAAAA	7.00056	76	19470	CCTGCAGG	4.28379	606	117
