# Supplementary material for: Highly Iterated Palindromic Sequences (HIPs) and Their Relationship to DNA Methyltransferases
Source: Life (Basel). 2015 Mar 17;5(1):921–48. doi: 10.3390/life5010921 (PMC4390886; doi:10.3390/life5010921)
Supplement: Supplementary file 1 [file life-05-00921-s001.zip › Suppl-Table-S4-Data-for-Fig-5-150213.xlsx]

## Sheet: Legend
		Supplemental Table S4 - Data for Figure 5 (and related information)
Column		Explanation for Figure 5 tab			Notes
A	Organism	Name of organism (for abbreviation, see Supplemental Table 1)		1	Gene names are those found in BioBIKE, which are
B	Phylogeny (Shih)	Group per Shih et al (2013) PNAS 110:1053-1058 (my additions marked with x or y)			generally similar to those in other databases.
C	Phylogeny (ML)	Groups per Maximum Likelihood tree (Fig. 1); order used in figures		2	Gene names with lines through them are probable
D	GC%	GC fraction of entire genome (including any plasmids)			pseudogenes, missing at least one critical motif
E	GCGATCGC	O/E ratio of GCGATCGC		3	Gene names of the form AAA:NNNN-NNNN are
F	Other	O/E ratio of other high frequency oligomer (see Table 2)			unannotated gene. AAA is the name of the contig
G	GATC MTase 1	Gene name of putative GATC-specific methyltransferase (Notes 1-3)			or replicon and the two numbers are the
H	GATC MTase 2	Gene name of second putative GATC-specific Mtase (Notes 1-3)			coordinates.
I	GATC RE	Gene name of putative GATC-specific restriction enzyme (Notes 1-3)		4	Gene names that contain two sets of coordinates
J					separated by | represent unannotated genes (see
K	GATC O/E	O/E ratio of GATC in genome (GCGATCGC instances subtracted)			Note 3) that have apparently been interrupted.
L	CGATCG MTase 1	Gene name of putative CGATCG-specific methyltransferase (Notes 1-3)			The original gene may be virtually reconstructed by
M	CGATCG MTase 2	Gene name of second putative CGATCG-specific Mtase (Note 1)			connecting the sequences defined by the two sets
N	CGATCG RE	Gene name of putative CGATCG-specific restriction enzyme (Notes 1-4)			of coordinates.
O
P	CGATCG O/E	O/E ratio of CGATCG in genome (GCGATCGC instances subtracted)
Q	GGCGCC MTase	Gene name of putative GGCGCC-specific methyltransferase (Notes 1 & 3)			Tabs
R	GrCGyC MTase 1	Gene name of putative GrCGyC-specific methyltransferase (Notes 1, 3, & 4)			Figure 5
S	GrCGyC MTase 2	Gene name of second putative GrCGyC-specific Mtase (Notes 1 & 3)			Numbers behind the graphical representation of
T	GrCGyC RE	Gene name of putative GrCGyC-specific restriction enzyme (Notes 1-2)			Figure 5.
U-X	GrCGyC O/E	O/E ratio of different forms of GrCGyC in genome: GGCGCC, GGCGTC, GACGCC, GACGTC
Y	DmtD	Gene name of putative rCCGGy-specific methyltransferase (Notes 1 & 3)			Not G-CGATCG-Not C
Z-AC	DmtD O/E	O/E ratio of different forms of rCCGGy in genome: GCCGGC, GCCGGT, ACCGGC, ACCGGT			Deviation from CGATCG in those instances where
AD	GCsGC MTase 1	Gene name of putative GCsGC-specific methyltransferase (Note 1)			the sequence is not flanked by C on the left or by
AE	GCsGC MTase 2	Gene name of second putative GCsGC-specific Mtase (Notes 1 & 3)			G on the right. See Columns Ah-AO for Figure 5
AF	GCsGC RE	Gene name of putative GCsGC-specific restriction enzyme (Note 1)			tab for further explanation
AG	GCsGC-O/E	O/E ratio of GCsGC in genome
AH-AO	Deviation from GCGATCG	Fraction of sequences deviating from GCGATCG at each position			TGATCA
		For example, for position -3 from center (C): [1 - (Count of GCGATCGC)/Count of GnGATCGC)]			Deviation from TGATCA. See Columns AH-AO for
AP-AW	Deviation from alternate HIP	Fraction of sequences deviating from alternate HIP (e.g. GGCGCC) at each position			Figure 5 tab for further explanation
		For example, for position -2 from center (G): [1 - (Count of GGCGCC)/Count of GnCGGC)]

## Sheet: Figure 5
	Phylogeny			HIP		GATC					CGATCG					GGCGCC	GrCGyC			GrCGyC O/E				DmtD	DmtD O/E				GCsGC MTase 1				Deviation from GCGATCG								Deviation from alternate HIP
Organism	Shih	ML	GC%	HIP1	Other	MTase1	MTase2	RE	O/E	O/E	MTase1	MTase2	RE	O/E	O/E	Mtase	MTase1	MTase2	RE	GGCGCC	GGCGTC	GACGCC	GACGTC	Mtase	GCCGGC	GCCGGT	ACCGGC	ACCGGT	MTase1	MTase2	RE	O/E	G	C	G	A	T	C	G	C	-4	-3	-2	-1	1	2	3	4
Trichodesmium erythraeum IMS101	A-111	P-111	0.341434	139.794		Tery_3905		Tery_3906	0.78	0.640502	Tery_0531			4.95124	0.968322					0.68	0.55	0.61	0.25		0.82	0.51	0.51	0.28	Tery_4810		Tery_4811	0.86	0.0838059	0.0408971	0.0383598	0.022521	0.0215343	0.0449918	0.0361286	0.0872567
Lyngbya PCC 8106	A-1121	P-1121	0.411069	65.9113		l8106?27901		l8106?27906	0.84	0.762824	l8106?27766			3.47853	0.777535		l8106?24310			0.8	0.52	0.56	0.25		0.23	0.21	0.21	0.12				1.47	0.0897628	0.106396	0.0814905	0.0328549	0.0288277	0.0842646	0.10003	0.0922156
Arthrospira platensis NIES-39	A-112212	P-1122	0.436504	131.914		NIESK4920			0.76	0.52266	NIESJ0480			9.39143	3.53282		NIESA3540		NIESA3530	0.04	0.05	0.05	0.01		0.37	0.54	0.54	0.36	NIESH0610			1.55	0.193894	0.010815	0.0358891	0.00453484	0.00941205	0.035526	0.0113242	0.189813
Oscillatoria nigro-viridis PCC 7112	A-1211	P-121	0.457845	59.5406	11.6895	Osc7112-3108		Osc7112-3107	0.88	0.757559	Osc7112-4408			12.3978	10.5295					0.62	0.86	0.87	0.01	Osc7112-1405	1.44	1.02	1.02	0.48	Osc7112-3395			2.09	0.491755	0.0348341	0.08598	0.0501459	0.0523922	0.0942445	0.0392844	0.484768	0.712798	0.255065	0.187996	0.173487	0.169177	0.1843	0.242872	0.715137
Planktothrix rubescens niva-cya 407	A-1212x	P-122	0.386887	102.254		N313-RS07050		N313-RS07045	0.87	0.763236	N313-RS14030		N313-RS14025	4.77334	1.0321		N313-RS14345			0.66	0.69	0.65	0.36		0.19	0.16	0.16	0.15	N313-RS10875			1.76	0.0866557	0.05101	0.0418251	0.0163236	0.015625	0.0542477	0.0516592	0.0893561
Oscillatoria acuminata PCC 6304	A-22	P-2	0.476122	103.634		osc63044716			0.76	0.548457	osc63041224			10.5784	5.41135					0	0.67	0.67	0.25		0.17	1.67	1.67	0.03				1.11	0.27555	0.0274408	0.0340442	0.00776029	0.00980294	0.0339518	0.0274408	0.272629
Dactylococcopsis salina PCC 8305	B2-111	Q-1111111	0.424384	56.2473	22.6833	Dacsa-0007		Dacsa-0006	0.98	0.914655	Dacsa-3149		Dacsa-3147	13.4282	12.2376					0.37	0.03	0.03	0.02		0.14	0.19	0.19	0.23				1.25	0.53215	0.0774527	0.059099	0.035393	0.0260449	0.0422872	0.0596492	0.546403	0.597775	0.121502	0.0516694	0.0694228	0.0584058	0.0628437	0.132994	0.582575
Halothece PCC 7418	B2-112	Q-1111112	0.429225	89.1526		Halo7148-0956			0.93	0.808962	Halo7148-2086			6.8068	3.04779		Halo7148-3642		Halo7148-3643	0.07	0.02	0.02	0.01		0.07	0.15	0.15	0.25	Halo7148-0094			0.09	0.23385	0.0572337	0.0539247	0.0169098	0.0211291	0.0496795	0.0515035	0.218297
Microcystis aeruginosa NIES843	B2-2112211	Q-111112	0.423306	41.6975		MAE_18940		CHROMOSOME:1697850-1698608	0.77	0.718628	MAE_17190			6.3967	5.07782		CHROMOSOME:5512474-5513037|5513150-5513434			0.27	0.06	0.03	0.03		1.16	1.48	1.48	1.16				1.9	0.450347	0.12494	0.165062	0.0784414	0.0723383	0.164679	0.13203	0.445831
Pleurocapsa PCC 7327	B2-21121	Q-111121	0.451933	123.843		Ple7327-3755			0.95	0.748051	Ple7327-3013			13.0229	7.65374					0.25	0.11	0.15	0.06		0.22	0.16	0.16	0.12				1.63	0.28616	0.0517586	0.0682161	0.0387669	0.0395146	0.0740852	0.0529222	0.29181
Cyanothece PCC 7822	B2-2112221	Q-1111221	0.398958	19.452	3.04843	Cyan7822-1616			0.79	0.767923	Cyan7822-3972			1.47761	0.782716					0.03	0.03	0.02	0.01		2.99	2.25	2.25	1.61	Cyan7822-2175	CHROMOSOME:4785556-4784342		3.95	0.246528	0.355126	0.336392	0.134596	0.136319	0.357988	0.384833	0.22913
Cyanothece PCC 7424	B2-2112222	Q-1111222	0.385098	78.7069		cyan7424-4006			0.87	0.791597	cyan7424-4262			6.4244	3.90335					0.03	0.02	0.02	0.01		2.84	2.28	2.28	1.61	cyan7424-2257	CHROMOSOME:4605561-4604182		1.69	0.289188	0.0779221	0.0619102	0.0270165	0.0216535	0.0751768	0.0731071	0.277826
Epithemia turgida etsb endosymbiont	B2-21111x	Q-111211	0.334135	15.2933		ETSB-0403			0.87	0.859387	ETSB-0711			0.774975	0.38217					0.31	0.44	0.46	0.37		0.81	0.85	0.85	0.7				1.67	0.225565	0.622711	0.536036	0.169356	0.119659	0.576132	0.612782	0.213741
Candidatus atelocyanobacterium thalassa	B2-2111111	Q-1112121	0.311168	15.2313		ucynA-06020			0.9	0.89451	ucynA-02710			0.528131	0.174342					0.68	0.57	0.53	0.61		0.73	0.65	0.65	0.39				1.25	0.0975632	0.260001	0.350878	0.0750023	0.0750023	0.439395	0.274511	0.0263183
Cyanothece CCY0110	B2-211111211	Q-11121211	0.366935	125.201		c0110?20625		CTC-032:3376-3516	0.88	0.761446	c0110?24656			5.37808	1.29289					0.09	0.03	0.05	0.02		1.19	1.1	1.1	0.71	c0110?04076			0.45	0.107551	0.0725355	0.0422199	0.0115952	0.00915813	0.0415673	0.0722296	0.120663
Cyanothece ATCC 51142	B2-211111212x	Q-11121212	0.379419	105.643		cce_2327		CHROMOSOME_C:2378372-2378280	0.91	0.799588	cce_3993			5.18245	1.53689		cce_4745		cce_4746	0.09	0.02	0.04	0.02		1.12	1.12	1.12	0.89				0.59	0.141009	0.0750268	0.0478117	0.0072853	0.00690448	0.0516484	0.0760171	0.140724
Crocosphaera watsonii WH8501	B2-211111222	Q-11121222	0.370982	117.216		Cw?4936		CONTIG360:143352-143597	0.84	0.720493	Cw?1784			5.29857	1.40709		CONTIG362:238850-239134|239131-239460		Cw?6135	0.08	0.03	0.03	0.02		0.64	0.65	0.65	0.58				0.85	0.126673	0.0732092	0.0743775	0.00676364	0.0111111	0.0607611	0.0726239	0.128228
Cyanothece PCC 8802	B2-2111121	Q-111221	0.398179	112.394		Cyan8802-3363		Cyan8802-3362	0.92	0.796015	Cyan8802-1018			5.88178	1.59801					0.02	0.02	0.03	0.01		0.35	0.4	0.4	0.29				1.01	0.127043	0.0584596	0.0406556	0.00620306	0.00943702	0.0439699	0.0558313	0.129042
Cyanothece PCC 8801	B2-2111122	Q-111222	0.397098	110.972		c8801?1082		c8801?1081	0.92	0.791699	c8801?3715			5.78438	1.5781					0.02	0.01	0.02	0		0.3	0.39	0.39	0.3				1.03	0.125039	0.0554627	0.0403938	0.00597751	0.00772202	0.045255	0.057038	0.132023
Stanieria cyanosphaera PCC 7437	B2-2221	Q-112	0.524473	227.863		Sta7437-1076	Sta7437-4850	Sta7437-4851	0.87	0.683597	Sta7437-2580			9.47708	2.23223					0.08	0.09	0.12	0.04		0.17	0.22	0.22	0.12	Sta7437-4391			0.1	0.105346	0.03838	0.0272415	0.0274501	0.0268241	0.0234711	0.0391949	0.106756
Synechocystis PCC 6803	B2-21112	Q-121	0.473596	70.0597		slr1803			1.03	0.834477	slr0214			6.39051	2.81343					0.27	0.31	0.31	0.12		1.09	1.43	1.43	0.66				1.57	0.224284	0.0453905	0.0375213	0.00616378	0.00674683	0.0377948	0.0432326	0.241997
Synechococcus PCC 7002	B2-22111	Q-1221	0.49187	114.695		SYNPCC7002_A1620			1.13	0.872226	SYNPCC7002_A0849			7.59412	0.762096					0.28	0.76	0.8	0.23		0.38	0.48	0.48	0.33				1.66	0.0362319	0.0496768	0.0249607	0.00516474	0.00516474	0.0249607	0.0467577	0.0368965
Leptolyngbya PCC 7376	B2-22112	Q-1222	0.438674	144.043		Lepto7376-01087	Lepto7376-03707,Lepto7376-03733,Lepto7376-03737		0.88	0.669855	Lepto7376-00933			7.78255	0.971628	LEP6406-RS04425				0.24	0.49	0.47	0.28		0.24	0.36	0.36	0.29				1.57	0.0410188	0.0794598	0.0420119	0.00933152	0.00750959	0.0338654	0.0719404	0.0437094
Prochloron didemni P4-Papua New Guinea	B2-2212X	Q-21	0.418982	68.6586		SEG-333:3069-2281			0.67	0.552379	SEG-52:11588-12901			4.48189	1.64983		SEG-95:16773-15877			0.05	0.07	0.05	0.03		0.13	0.61	0.61	0.79				1.2	0.173887	0.117031	0.141271	0.0704507	0.0698296	0.149404	0.119823	0.172414
Cyanobacterium stanieri PCC 7202	B2-22121	Q-2211	0.386647	132.89		Cyast-1029			0.76	0.611187	Cyast-1970			6.42242	1.62696					1.9	0.07	0.07	0.03		0.04	0.08	0.08	0.07				1.48	0.127642	0.0114943	0.0273327	0.00769234	0.0048216	0.0259556	0.00864553	0.124311
Geminocystis herdmanii PCC 6308	B2-221221	Q-2212	0.537075	44.4047	69.9455	SYN6308-RS08400	SYN6308-RS06520	CHROMOSOME:1289940-1289173	0.92	0.895431	SYN6308-RS01765			20.6785	21.3249		SYN6308-RS20125		SYN6308-RS20130	0.87	0.03	0.03	0.02		0.07	0.3	0.3	0.14				1.65	0.663855	0.0425141	0.211568	0.00384641	0.00384641	0.201849	0.0477943	0.658311	0.372729	0.033462	0.0322165	0.00529802	0.00232482	0.0315925	0.0309677	0.369966
Cyanobacterium aponinum PCC 10605	B2-221222	Q-222	0.349314	177.127		Cyan0088			0.72	0.57295	Cyan3014	Cyan2460	Cyan2459	8.92516	3.90193					0.6	0.16	0.08	0.05		0.1	0.46	0.46	0.23				2.38	0.213932	0.0207049	0.0279843	0.00269181	0.00269181	0.0288336	0.0189762	0.219178
Oscillatoria PCC 10802	A-21	R-11	0.539447	5.06041	4.52733	OSC10802-RS10820			0.6	0.578957	OSC10802-RS17115	OSC10802-RS25175		1.11606	0.887411	SEG-1:3436772-3435561				0.01	1.48	1.44	0.19	OSC10802-RS19505	4.93	5.98	5.98	0.59				1.38	0.401617	0.390529	0.590406	0.5706	0.563851	0.582903	0.399594	0.39427
Mastigocladopsis repens PCC 10914	B1-11112	R-1211	0.435719	55.4443					0.57	0.44319	SEG-1:581626-582924			3.13357	0.565666					0.15	0.79	0.77	0.18	SEG-2:182263-181076	0.2	0.28	0.28	0.19				1.24	0.0708402	0.047619	0.1146	0.0568562	0.0581163	0.126935	0.0447155	0.0861957
Calothrix PCC 7103	B1-11121	R-1212111	0.385345	2.92987	30.0113	CAL7103-RS119490		CAL7103-RS119485	0.16	0.157349	SEG-1:5576288-5575494		CAL7103-RS125805	0.246047	0.152108		CAL7103-RS142770	SEG-1:8004478-8005401		30.01	0.3	0.28	0.05	CAL7103-RS131270	0.26	0.17	0.17	0.07				1.35	0.308017	0.330613	0.791349	0.623853	0.637168	0.781041	0.327869	0.290044		0.0998988	0.0710331	0.112298	0.117013	0.0737423	0.104251
Calothrix PCC 6303	B1-11122	R-1212112	0.397969	121.816		Cal6303-1304		Cal6303-1303	0.64	0.477412	Cal6303-5404			5.73653	1.02344		Cal6303-4523		Cal6303-4524	0.02	0.02	0.01	0.01		0.11	0.11	0.11	0.12				1.22	0.0507564	0.0217436	0.0547076	0.0193296	0.0263373	0.0481038	0.0215429	0.0535821
Chlorogloeopsis fritschii PCC 6912	B1-12x	R-12121211	0.414717	134.019		SEG-2:92099-92938			0.82	0.60563	SEG-23:32631-34109			7.89802	2.40906					0.04	0.72	0.79	0.22	SEG-4:145994-144840	0.21	0.22	0.22	0.14				1.46	0.142352	0.0324756	0.0371131	0.0159552	0.0142997	0.0390871	0.0359249	0.137618
Fischerella thermalis PCC 7521	B1-12y	R-12121212	0.410156	137.377		SEG-23:13436-14335			0.83	0.615875	SEG-30:66033-64759			6.97518	1.34933					0.23	0.94	0.93	0.31		0.28	0.29	0.29	0.25				1.2	0.0872521	0.0351368	0.0236363	0.0114543	0.0108473	0.0283474	0.0312688	0.0863894
Rivularia PCC 7116	B1-12	R-12121221	0.375316	60.1521		Riv7116-4672			0.32	0.245271	Riv7116-5615			2.63152	0.569332					0.01	0.03	0.02	0.02		0.02	1.32	1.32	0.79				1.52	0.0690803	0.0222902	0.163738	0.0608732	0.056914	0.158706	0.0210066	0.0733223
Richelia intracellularis HH01	B1-12z	R-12121222	0.337117	3.67114		RINTHH-12290			0.67	0.671719	RINTHH-03490			0.215539	0.122147					0.23	0.24	0.36	0.22		0.89	0.76	0.76	0.47				0.92	0.189191	0.719626	0.747899	0.318183	0.285716	0.734514	0.761905	0.347828
Nostoc PCC 7524	B1-1121111	R-121221111111	0.415311	122.109		Nos7524-1504			0.66	0.466093	Nos7524-0178			6.05868	0.894017		Nos7524-5010			0.01	0.01	0.01	0.01	Nos7524-4974	0.47	0.48	0.48	0.28	Nos7524-1123			1.61	0.0684341	0.0178197	0.0361735	0.00811571	0.0102113	0.0340206	0.0150666	0.063
Anabaena PCC 7120	B1-11211121	R-12122111111211	0.412683	118.642		all0061	All7280		0.61	0.410324	alr2276			6.06617	1.14223					0.04	0.03	0.03	0.02	Alr4173	0.7	0.48	0.48	0.21				1.64	0.0873398	0.0196247	0.0459039	0.0147059	0.0184419	0.0452641	0.0224854	0.0882165
Anabaena variabilis ATCC 29413	B1-11211122	R-12122111111212	0.414098	118.913		Ava2663			0.61	0.412443	Ava0101			6.22376	1.2682					0.02	0.02	0.03	0.02	Ava0731	0.63	0.49	0.49	0.24				1.66	0.0923101	0.0182162	0.044489	0.0141501	0.0151698	0.0395091	0.0172028	0.095615
Nostoc PCC 7107	B1-112112	R-1212211111122	0.403578	152.855		Nos7107-2420			0.67	0.439057	Nos7107-2999			7.40909	1.33359					0.01	0.01	0.02	0.01		0.46	0.29	0.29	0.14				2.1	0.0866352	0.024681	0.0353703	0.0110657	0.00971699	0.0377671	0.0240256	0.0791059
Microchaete PCC 7126	B1-11212212	R-12122111112	0.422068	120.731		SEG-1:4916333-4917163			0.66	0.445538	SEG-2:182089-183387			6.44141	1.20244					1.19	1.3	1.38	0.26	SEG-1:2825815-2824619	0.74	0.54	0.54	0.29				1.59	0.083468	0.0178881	0.0409467	0.0188317	0.019397	0.0380558	0.0175101	0.0860927
Nostoc punctiforme ATCC 29133	B1-1121222	R-1212211112	0.413545	123.987		NpR0701			0.71	0.510668	NpF2933			7.4122	2.37823		NpR6310		NpR6311	0.02	0.04	0.05	0.01	NpF4343	0.36	0.35	0.35	0.2				1.57	0.137174	0.0269434	0.0514013	0.0246802	0.0213925	0.0518779	0.0309411	0.138946
Cylindrospermum stagnale PCC 7417	B1-11212111	R-121221112	0.422016	93.3648		Cylst-2310			0.67	0.508455	Cylst-3068			4.85063	0.781338					0.43	0.86	0.88	0.17	Cylst-3000	0.77	0.63	0.63	0.31	Cylst-2042			1.71	0.0673077	0.0303591	0.0697922	0.0183658	0.021666	0.0711119	0.0283806	0.0658106
Anabaena PCC 7108	B1-1121211212	R-12122112	0.387742	90.3983		ANA7108-RS122915			0.63	0.516026	ANA7108-RS122200		CHROMOSOME:4736221-4735778|4735593-4735264	3.62481	0.253194		ANA7108-RS109310		ANA7108-RS109315	0.01	0.02	0.02	0.01	ANA7108-RS121885	0.62	0.6	0.6	0.33				1.5	0.0275431	0.0367407	0.0731537	0.0239587	0.0203478	0.0795968	0.0370909	0.0335767
Nodularia spumigena CCY9414	B1-1121212	R-1212212111	0.412658	112.187		n9414?21826			0.65	0.458483	n9414?02726			5.07048	0.331726					0.03	0.01	0.01	0.01	n9414?13048	0.77	0.56	0.56	0.27				1.58	0.0257795	0.00750375	0.037594	0.0136714	0.0197629	0.0345499	0.0117061	0.0243422
Scytonema hofmanni UTEX 2349	B1-1121212y	R-1212212112	0.362232	155.775		SEG-1:5153691-5152864			0.69	0.440215	SEG-1:(4710605-4710622|4710622-4711902			8.30949	1.94073		SEG-1:1775506-1776405			0.51	0.44	0.47	0.12	SEG-1:4334807-4336027	0.83	0.71	0.71	0.36				1.33	0.107411	0.0174983	0.0325961	0.0156361	0.0180787	0.0338333	0.0214319	0.110564
Anabaena 90	B1-112121x	R-121221212	0.380965	84.1866		ANA-C11384			0.68	0.580703	ANA-C20386			3.23241	0.197823		ANA-C10332			0.04	0.03	0.02	0.02	ANA-C11293	0.58	0.72	0.72	0.4				1.64	0.026203	0.0308203	0.0721743	0.032197	0.0289786	0.103115	0.0299003	0.0271299
Calothrix PCC 7507	B1-11212211	R-12122122	0.422472	124.09		Cal7507-1523			0.72	0.510844	Cal7507-3582			7.07985	1.74346					0.16	0.46	0.4	0.05		0.42	0.41	0.41	0.23				1.51	0.116343	0.0178001	0.0394287	0.0134474	0.0114837	0.0414254	0.0192921	0.112943
Anabaena cylindrica PCC 7122	B1-1121211211	R-1212221	0.387906	105.46		Anacy-4132			0.67	0.53048	Anacy-3963			4.49264	0.586486		Anacy-0949		Anacy-0948	0.05	0.02	0.03	0.01	Anacy-4035	0.63	0.64	0.64	0.32				1.42	0.0568817	0.0353247	0.0592705	0.0164195	0.0132837	0.067537	0.0305403	0.0559227
Raphidiopsis brookii d9	B1-11212112211	R-121222211	0.400568	73.7205		SEG-17:1550-744			0.87	0.760074	CRD-2058			3.22199	0.295991					0.27	0.14	0.18	0.06		0.14	0.33	0.33	1.51				0.53	0.031983	0.0367752	0.0435394	0.00945461	0.0123278	0.0333571	0.0495465	0.0347272
Cylindrospermopsis raciborskii CS-505	B1-11212112212	R-121222212	0.402342	81.4987		Craci02283			0.86	0.734292	Craci02921			3.62595	0.366776					0.33	0.29	0.19	0.07		0.12	0.26	0.26	1.29				0.53	0.032575	0.0672982	0.0746786	0.00637287	0.00584489	0.0926285	0.0746786	0.0439449
Nostoc azollae-0708	B1-1121211222	R-12122222	0.383737	42.9828		Aazo-4929			0.63	0.579365	Aazo-3736			1.95208	0.410542					0.1	0.17	0.17	0.08	Aazo-2537	0.31	0.43	0.43	0.34				1.14	0.0911311	0.28121	0.17075	0.153788	0.153788	0.171365	0.278424	0.0911311
Gloeocapsa PCC 7428	B1-221	R-12211	0.432694	164.843		Glo0730			0.93	0.657414	Glo2555			10.8073	3.52202					0.02	0.72	0.7	0.37		0.17	0.4	0.4	0.23				1.95	0.143039	0.0235294	0.0413963	0.0154605	0.0159851	0.0469617	0.0218485	0.139546
Chroococcidiopsis thermalis PCC 7203	B1-222	R-12212	0.444747	161.294		Chro-1565			1.08	0.805601	Chro-0155			14.8241	7.83785					0.01	0.01	0.02	0.02		0.06	0.09	0.09	0.08				1.54	0.253286	0.0242577	0.0333558	0.0143109	0.0126657	0.0389909	0.0221704	0.253563
Microcoleus PCC 7113	B3-2	R-1222	0.462133	65.5102		Mic7113-0999			0.63	0.48772	Mic7113-6065			4.91504	1.61222					0.01	1.05	1.06	0.08	Mic7113-2416	0.31	0.64	0.64	0.54				1.44	0.14674	0.0489985	0.0848997	0.0376884	0.0292329	0.0857734	0.0432972	0.146867
Crinalium epipsammum PCC 9333	B4-1	R-211	0.401626	154.373		Cri4759	Cri3226	Cri4754	0.9	0.685306	Cri2278			7.35705	1.27304		Cri2554		Cri2555	0.03	0.03	0.03	0.02	Cri1489	0.03	0.02	0.02	0.02				1.3	0.0750091	0.0226444	0.0408663	0.0114518	0.0133669	0.0379675	0.0273109	0.0733261
Oscillatoriales cyanobacterium JSC-12	B4-1x	R-212	0.474716	98.929		osc123642			0.89	0.695967	osc124271			8.25999	3.08556					0.1	0.32	0.31	0.07		0.05	0.19	0.19	0.14				1.26	0.169558	0.0432379	0.0608127	0.0137367	0.0117148	0.0621178	0.0448627	0.183622
Chamaesiphon minutus PCC 6605	B4-2	R-22	0.456701	42.8024	50.6202	Cha3816			1.09	1.05011	Cha3188		Cha3189	21.48	21.7876					0.01	0.67	0.59	0.25	Cha0702	0.01	0.01	0.01	0.01				1.93	0.65311	0.166988	0.209606	0.107048	0.0993456	0.210636	0.162379	0.653745	0.552297	0.158699	0.0815513	0.112279	0.11476	0.0810517	0.164248	0.557225
Prochlorococcus marinus NATL2a	C1-2111111	S-1111111111	0.35123	0.703183					0.98	0.981064				0.363249	0.375937					0.83	0.48	0.55	0.5		0.61	0.52	0.52	0.52				1.5	0.764707	0.851852	0.945206	0.500006	0.333344	0.911111	0.800001	0.764707
Prochlorococcus marinus NATL1a	C1-2111112	S-1111111112	0.349793	0.531836					0.97	0.977167				0.450084	0.477348					0.97	0.57	0.58	0.49		0.69	0.46	0.46	0.5				1.39	0.812501	0.888889	0.946429	0.625005	0.875001	0.921053	0.850001	0.857143
Prochlorococcus marinus SS120	C1-211122	S-111111112111	0.364421	0.463547					1	1.00749				0.297542	0.311304					0.92	0.63	0.6	0.42		0.5	0.51	0.51	0.31				1.09	0.700003	0.869566	0.942308	0.500008	0.66667	0.928572	0.892858	0.800001
Prochlorococcus marinus MED4	C1-21111211	S-111111112112	0.307992	0.377751					0.93	0.928897				0.277704	0.293627					1.04	0.54	0.62	0.23		0.99	0.67	0.67	0.52				1.66	0.833336	0.944445	0.96	0.666678	0.666678	0.923077	0.900001	0.88889
Prochlorococcus marinus MIT9515	C1-21111212	S-11111111212	0.307942	0.73562					0.92	0.924712				0.366231	0.381084					1.19	0.8	0.51	0.26		1.23	0.82	0.82	0.5				1.74	0.875001	0.857144	0.928572	0.666672	0.77778	0.92	0.818183	0.71429
Prochlorococcus marinus AS9601	C1-2111122111	S-11111111221	0.313215	0.688472					0.92	0.920724				0.261723	0.26773					1.38	0.57	0.65	0.26		1.1	0.6	0.6	0.37				1.62	0.750003	0.833335	0.939394	0.750003	0.71429	0.955556	0.846155	0.71429
Prochlorococcus marinus MIT9301	C1-2111122112	S-111111112221	0.313399	0.698113					0.92	0.925743				0.377131	0.393661					1.32	0.6	0.68	0.28		1.23	0.59	0.59	0.5				1.63	0.857144	0.875001	0.928572	0.77778	0.500012	0.941177	0.818183	0.750003
Prochlorococcus marinus MIT9312	C1-21111222	S-111111112222	0.312105	0.684912					0.94	0.93981				0.225166	0.22794					1.38	0.53	0.39	0.17		1.22	0.55	0.55	0.42				1.55	0.750003	0.818183	0.931035	0.71429	0.600008	0.95122	0.888889	0.666672
Prochlorococcus marinus MIT9211	C1-211121	S-11111112	0.396825	1.07812					1.05	1.05013				0.57098	0.586925					1.36	0.91	0.87	0.5		1.39	1.03	1.03	0.45				1.64	0.725001	0.803572	0.872093	0.710527	0.717949	0.853334	0.775511	0.656251
Prochlorococcus marinus MIT9313	C1-21121	S-1111112	0.507398	2.41051					1.02	1.01916				1.40294	1.42325					0.91	0.71	0.84	0.52		0.98	0.78	0.78	0.54				1.2	0.65942	0.676976	0.778302	0.477778	0.525253	0.763224	0.675862	0.631373
Prochlorococcus marinus MIT9303	C1-21122	S-111112	0.500076	2.5391					1.03	1.02602				1.3432	1.34836					0.98	0.79	0.74	0.56		1.03	0.77	0.77	0.53				1.27	0.614815	0.659017	0.769911	0.455498	0.487685	0.778724	0.665595	0.649832
Synechococcus WH8102	C1-212111	S-11112111111	0.592176	2.2787					1.04	1.03582				2.03009	2.14155					0.8	1.03	0.98	0.77		1.21	1.27	1.27	1.14				1.19	0.674274	0.709797	0.704331	0.548851	0.535503	0.695736	0.690945	0.695736
Synechococcus BL107	C1-212121	S-1111211111121	0.54205	3.117					0.99	0.984736				2.06062	2.11044					0.84	1.03	1.01	0.8		0.91	0.9	0.9	0.93				1.17	0.645084	0.639903	0.699187	0.533123	0.478873	0.699797	0.637255	0.651765
Synechococcus CC9902	C1-212122	S-1111211111122	0.597981	3.10932					0.98	0.979765				2.1079	2.16569					0.88	0.98	1.01	0.78		0.88	0.9	0.9	0.96				1.17	0.649635	0.638191	0.703704	0.506849	0.521595	0.703093	0.652174	0.656325
Synechococcus CC9605	C1-2121121	S-11112111112	0.541645	2.14673					1.03	1.02598				1.90319	2.00667					0.85	0.99	0.98	0.7		1.16	1.13	1.13	1.05				1.19	0.681435	0.699203	0.711832	0.563584	0.587432	0.726944	0.706796	0.695565
Synechococcus RS9916	C1-212221	S-11112111121	0.643252	2.80801					1.01	1.0105				2.09883	2.16677					0.87	0.89	0.91	0.57		1.09	1.12	1.12	1.08				1.12	0.648208	0.664596	0.688312	0.548117	0.546219	0.683284	0.643564	0.656051
Synechococcus RS9917	C1-212222	S-11112111122	0.411368	4.85516					1.04	1.02878				3.62813	3.72729					1.13	0.96	0.92	0.43		1.32	1.42	1.42	1.26				1.26	0.638298	0.560199	0.577033	0.392857	0.437659	0.580645	0.58653	0.621251
Synechococcus RCC307	C1-1	S-111121112	0.608435	2.79574	11.4691				1.01	1.00474				1.80844	1.82361					1.15	0.71	0.72	0.34		1.4	1.16	1.16	0.97				1.61	0.63086	0.648699	0.733427	0.545673	0.567506	0.741803	0.667254	0.632296
Synechococcus CC9311	C1-2122121	S-11112112	0.342759	3.44298					1	1.0006				2.03476	2.06118					0.84	0.94	0.88	0.68		0.83	0.77	0.77	0.74				1.13	0.663951	0.634956	0.719388	0.485981	0.496951	0.691589	0.650424	0.661191
Synechococcus WH7805	C1-2122111	S-11112121	0.554378	2.89524					1.01	1.00439				2.27069	2.36422					0.74	0.97	0.89	0.72		1.05	1.07	1.07	1.03				1.06	0.671743	0.690096	0.687601	0.5	0.525672	0.692552	0.675042	0.686591
Synechococcus WH7803	C1-2122112	S-11112122	0.60236	3.66577					1	1.00075				2.56145	2.61838					0.82	0.88	0.92	0.55		1.04	1.06	1.06	0.98				1.06	0.651226	0.639944	0.630058	0.517891	0.500975	0.632184	0.626822	0.648834
Synechococcus WH5701	C1-221	S-11112211	0.660416	3.24588					1.07	1.06289				3.00783	3.18229					0.97	0.7	0.68	0.35		1.36	1.23	1.23	0.72				1.28	0.657791	0.624052	0.535475	0.493431	0.468607	0.562972	0.606576	0.653
Cyanobium gracile PCC 6307	C1-22221	S-11112212	0.687072	2.49818					1.05	1.04333				2.73241	2.95186					1.08	0.89	0.93	0.67		1.58	1.39	1.39	0.68				1.32	0.698113	0.642173	0.61991	0.540356	0.566452	0.615561	0.660263	0.681818
Paulinella chromatophora chromatophore	C1-2222x	S-1111222	0.379874	1.73483					1.03	1.03225				0.868364	0.891756					0.98	0.75	0.79	0.74		1.25	1.23	1.23	0.67				1.51	0.666668	0.666668	0.757576	0.46667	0.428576	0.777778	0.724139	0.703705
Synechococcus elongatus PCC 7942	C2-1	S-11121	0.594126	121.37		Synpcc7942_1790			1.12	0.855483				16.5227	8.62255					0.34	0.82	0.83	0.37		0.71	1.23	1.23	0.58				1.44	0.236567	0.0281872	0.0436443	0.012871	0.0109225	0.0493296	0.0311936	0.234155
Synechococcus elongatus PCC 6301	C2-2	S-11122	0.554843	120.802		syc2303			1.12	0.856032				16.5078	8.63893					0.35	0.84	0.82	0.37		0.72	1.23	1.23	0.61				1.44	0.236533	0.0327416	0.0499806	0.0116888	0.0147334	0.0438061	0.0282695	0.235581
Prochlorothrix hollandica PCC 9006	C22-1	S-112	0.541926	34.2236		PRO9006-RS0109030	Pro9006-RS0102450		1.25	1.16334	PRO9006-RS0123845			10.5037	9.28486		SEG-2:869386-870279		PRO9006-RS0120325	0.01	0.01	0.01	0.01		0.12	0.84	0.84	0.88				1.03	0.527444	0.0829715	0.0700046	0.0130382	0.0113356	0.0710813	0.0877672	0.52204
Thermosynechococcus elongatus BP1	E-111	S-1211	0.539179	69.6305		tlr1578	tlr1640		1.09	0.847696	tll1944			6.64438	1.85599					0.73	0.54	0.57	0.21		0.82	0.8	0.8	0.81				1.46	0.128652	0.0319149	0.0709424	0.0138928	0.0130701	0.0596184	0.0327064	0.117384
Thermosynechococcus NK55a	E-112x	S-1212	0.538072	69.6214		NK55-04530			1.11	0.859498	NK55-06420			6.64228	1.87774					0.81	0.55	0.57	0.18		0.9	0.77	0.77	0.76				1.51	0.12127	0.0290161	0.0592896	0.0120773	0.0157754	0.0600102	0.026448	0.119589
Cyanothece PCC 7425	E-12	S-1221	0.506484	38.428		Cyan7425-3837			1.14	1.06113	Cyan7425-1872			9.33876	7.89846					0.1	0.2	0.2	0.1		0.41	0.95	0.95	0.21				1.13	0.469706	0.0838892	0.0931945	0.0259138	0.0232494	0.087401	0.0867007	0.471824
Acaryochloris marina MBIC11017	E-21	S-1222	0.469559	24.1813		AM1_3079	pREB3:215129-214596		0.84	0.795234	AM1_0729	AM1_A0329		2.15043	0.926338					0.2	0.79	0.76	0.45		0.19	0.53	0.53	0.41				1.06	0.141312	0.199328	0.223345	0.0673453	0.06698	0.227626	0.199597	0.13539
Pseudanabaena PCC 7367	F-2	S-2	0.462239	110.747	11.5284	Pse7367-1875			1.37	1.24419				22.0056	18.4233					0.06	0.03	0.03	0.01		0.45	0.65	0.65	0.54				1.95	0.470327	0.126831	0.0961189	0.0129139	0.0106207	0.090604	0.124908	0.470985
Leptolyngbya PCC 6406	C3-1	T-11	0.551053	41.9698		LEP6406-RS03495			0.99	0.854535	LEP6406-RS22455			4.40098	1.481					0	0.58	0.59	0.09		0.09	0.45	0.45	0.15				1.21	0.126777	0.0974333	0.114773	0.0199853	0.0212415	0.108275	0.0931455	0.116821
Leptolyngbya Heron Island J	C3-1x	T-12	0.480491	36.6371		N836-27200			0.8	0.717775	N836-16870			2.94882	0.941805					0.01	0.74	0.71	0.49		0.19	1.18	1.18	0.67				1.34	0.0875982	0.115598	0.137489	0.0514724	0.0412706	0.156284	0.114372	0.0934248
Geitlerinema PCC 7407	D-1	T-2	0.584631	95.1177		GEI1095			1.11	0.81015				11.4005	3.94867					0.54	1.26	1.23	0.69		0.37	1.06	1.06	0.44				1.46	0.136183	0.0337876	0.0287752	0.0181907	0.0181103	0.0261704	0.0333199	0.141814
Synechococcus PCC 7336	G-21	U-1	0.575433	81.6574		SYN7336-RS7830			1.03	0.816001	SYN7336-RS9770			13.4765	8.91303					0.1	0.67	0.7	0.26		0.19	0.82	0.82	0.64				1.35	0.326909	0.0575964	0.0762392	0.036625	0.0331511	0.0715961	0.0579168	0.325817
Synechococcus os type A prime	G-11	V-1	0.602373	0.774268	39.3028	CYA_0956			1.12	1.12298				0.440288	0.43423					0.64	0.46	0.51	0.21		1.46	1.1	1.1	0.35				1.37	0.641711	0.857143	0.838942	0.756364	0.749064	0.826425	0.857143	0.598803	0.365722	0.147833	0.051325	0.0365439	0.0313301	0.051325	0.148899	0.370302
Synechococcus os type B prime	G-12	V-2	0.584503	0.695712	50.0303	CYB_2715			1.12	1.1301				0.411781	0.41105					0.38	0.35	0.36	0.12		1.21	1.16	1.16	0.55				1.16	0.601399	0.859951	0.856061	0.766394	0.768293	0.8575	0.857855	0.688525	0.358529	0.112771	0.0465224	0.0289031	0.0330266	0.0535673	0.116595	0.361825
Gloeobacter violaceus PCC 7421	H-1	W-1	0.619979	2.13058		glr2709			0.91	0.911346				2.23726	2.40064					0.73	0.93	0.96	0.51		0.8	1.91	1.91	1.26				1.6	0.743755	0.694524	0.683267	0.770893	0.76839	0.69511	0.696565	0.723958
Gloeobacter kilaueensis JS1	H-1x	W-2	0.605368	3.40724		GKIL-0632			0.96	0.953558				3.75956	4.05347	GKIL-2985				0	1.02	1	0.27		0.46	2.06	2.06	1.14				1.44	0.765678	0.6	0.616852	0.6492	0.653487	0.614091	0.593249	0.759241

## Sheet: Not G-CGATCG-Not C
Organism	Shih	ML	GC%	HIP1	Other	Not G	C	G	A	T	C	G	Not C
Trichodesmium erythraeum IMS101	A-111	P-111	0.341434	139.794			0.933102	0.922065	0.802564	0.816229	0.921348	0.930443
Lyngbya PCC 8106	A-1121	P-1121	0.411069	65.9113			0.960149	0.95537	0.911724	0.915955	0.957714	0.960832
Arthrospira platensis NIES-39	A-112212	P-1122	0.436504	131.914			0.940635	0.9654	0.921634	0.906824	0.963059	0.939983
Oscillatoria nigro-viridis PCC 7112	A-1211	P-121	0.457845	59.5406	11.6895		0.349811	0.295515	0.223837	0.229326	0.303236	0.346069
Planktothrix rubescens niva-cya 407	A-1212x	P-122	0.386887	102.254			0.932108	0.937412	0.816552	0.825916	0.937617	0.934547
Oscillatoria acuminata PCC 6304	A-22	P-2	0.476122	103.634			0.822245	0.911536	0.811466	0.804011	0.913483	0.81943
Dactylococcopsis salina PCC 8305	B2-111	Q-1111111	0.424384	56.2473	22.6833		0.236803	0.247114	0.135402	0.139528	0.239454	0.242274
Halothece PCC 7418	B2-112	Q-1111112	0.429225	89.1526			0.901312	0.895572	0.783562	0.772989	0.891259	0.900378
Microcystis aeruginosa NIES843	B2-2112211	Q-111112	0.423306	41.6975			0.616471	0.652079	0.440513	0.432123	0.669347	0.615959
Pleurocapsa PCC 7327	B2-21121	Q-111121	0.451933	123.843			0.675901	0.684336	0.597932	0.595224	0.687692	0.672123
Cyanothece PCC 7822	B2-2112221	Q-1111221	0.398958	19.452	3.04843		0.902848	0.910141	0.784416	0.774252	0.907675	0.902582
Cyanothece PCC 7424	B2-2112222	Q-1111222	0.385098	78.7069			0.672903	0.68243	0.420902	0.400709	0.685093	0.673535
Epithemia turgida etsb endosymbiont	B2-21111x	Q-111211	0.334135	15.2933			0.959938	0.965924	0.873786	0.864583	0.966495	0.96259
Candidatus atelocyanobacterium thalassa	B2-2111111	Q-1112121	0.311168	15.2313			0.963333	0.955285	0.755556	0.788462	0.952991	0.963333
Cyanothece CCY0110	B2-211111211	Q-11121211	0.366935	125.201			0.973175	0.976618	0.910973	0.913307	0.977522	0.973538
Cyanothece ATCC 51142	B2-211111212x	Q-11121212	0.379419	105.643			0.951529	0.956499	0.845872	0.845304	0.956768	0.950963
Crocosphaera watsonii WH8501	B2-211111222	Q-11121222	0.370982	117.216			0.960333	0.961443	0.907186	0.890845	0.96051	0.957388
Cyanothece PCC 8802	B2-2111121	Q-111221	0.398179	112.394			0.959548	0.967495	0.88296	0.879433	0.966618	0.960024
Cyanothece PCC 8801	B2-2111122	Q-111222	0.397098	110.972			0.958625	0.96732	0.885159	0.887737	0.966356	0.959016
Stanieria cyanosphaera PCC 7437	B2-2221	Q-112	0.524473	227.863			0.953678	0.941495	0.852174	0.865688	0.943548	0.955179
Synechocystis PCC 6803	B2-21112	Q-121	0.473596	70.0597			0.940604	0.955081	0.887454	0.879921	0.956491	0.940662
Synechococcus PCC 7002	B2-22111	Q-1221	0.49187	114.695			0.942063	0.928876	0.853372	0.868248	0.932841	0.944964
Leptolyngbya PCC 7376	B2-22112	Q-1222	0.438674	144.043			0.892122	0.913966	0.789422	0.793666	0.912029	0.898919
Prochloron didemni P4-Papua New Guinea	B2-2212X	Q-21	0.418982	68.6586			0.885017	0.924829	0.847364	0.846226	0.922535	0.887064
Cyanobacterium stanieri PCC 7202	B2-22121	Q-2211	0.386647	132.89			0.988183	0.992537	0.955556	0.958763	0.992734	0.986885
Geminocystis herdmanii PCC 6308	B2-221221	Q-2212	0.537075	44.4047	69.9455		0.0940908	0.158348	0.0318372	0.0286263	0.161519	0.0924658
Cyanobacterium aponinum PCC 10605	B2-221222	Q-222	0.349314	177.127			0.706215	0.818023	0.481297	0.465296	0.826667	0.715847
Oscillatoria PCC 10802	A-21	R-11	0.539447	5.06041	4.52733		0.774678	0.764662	0.78852	0.78852	0.758436	0.775721
Mastigocladopsis repens PCC 10914	B1-11112	R-1211	0.435719	55.4443			0.935943	0.968513	0.934227	0.933579	0.966397	0.934625
Calothrix PCC 7103	B1-11121	R-1212111	0.385345	2.92987	30.0113		0.870152	0.975648	0.962748	0.962585	0.975384	0.87037
Calothrix PCC 6303	B1-11122	R-1212112	0.397969	121.816			0.778308	0.855197	0.625378	0.644019	0.855702	0.777645
Chlorogloeopsis fritschii PCC 6912	B1-12x	R-12121211	0.414717	134.019			0.901725	0.888178	0.764389	0.767111	0.888889	0.904029
Fischerella thermalis PCC 7521	B1-12y	R-12121212	0.410156	137.377			0.955806	0.96323	0.90538	0.907273	0.96225	0.955302
Rivularia PCC 7116	B1-12	R-12121221	0.375316	60.1521			0.862238	0.931928	0.8424	0.843028	0.933084	0.858273
Richelia intracellularis HH01	B1-12z	R-12121222	0.337117	3.67114			0.975477	0.980562	0.91	0.92623	0.981053	0.975871
Nostoc PCC 7524	B1-1121111	R-121221111111	0.415311	122.109			0.9801	0.99082	0.96603	0.965591	0.990448	0.978437
Anabaena PCC 7120	B1-11211121	R-12122111111211	0.412683	118.642			0.968146	0.984683	0.960894	0.96034	0.985965	0.966387
Anabaena variabilis ATCC 29413	B1-11211122	R-12122111111212	0.414098	118.913			0.94508	0.975819	0.933148	0.925117	0.975052	0.945455
Nostoc PCC 7107	B1-112112	R-1212211111122	0.403578	152.855			0.956698	0.978187	0.93858	0.940631	0.979747	0.958387
Microchaete PCC 7126	B1-11212212	R-12122111112	0.422068	120.731			0.943373	0.969261	0.924679	0.925515	0.96954	0.943577
Nostoc punctiforme ATCC 29133	B1-1121222	R-1212211112	0.413545	123.987			0.818182	0.821845	0.659919	0.666887	0.821782	0.82322
Cylindrospermum stagnale PCC 7417	B1-11212111	R-121221112	0.422016	93.3648			0.953846	0.969834	0.918589	0.92228	0.97006	0.957204
Anabaena PCC 7108	B1-1121211212	R-12122112	0.387742	90.3983			0.989717	0.992945	0.980247	0.980392	0.993294	0.98995
Nodularia spumigena CCY9414	B1-1121212	R-1212212111	0.412658	112.187			0.996774	0.99817	0.995	0.995349	0.998232	0.99681
Scytonema hofmanni UTEX 2349	B1-1121212y	R-1212212112	0.362232	155.775			0.957655	0.968046	0.933447	0.931398	0.96798	0.956278
Anabaena 90	B1-112121x	R-121221212	0.380965	84.1866			0.989247	0.991917	0.978125	0.979651	0.991842	0.989826
Calothrix PCC 7507	B1-11212211	R-12122122	0.422472	124.09			0.940128	0.953693	0.883656	0.889474	0.954073	0.938371
Anabaena cylindrica PCC 7122	B1-1121211211	R-1212221	0.387906	105.46			0.976721	0.983607	0.956357	0.955684	0.982031	0.975636
Raphidiopsis brookii d9	B1-11212112211	R-121222211	0.400568	73.7205			0.951763	0.960902	0.881279	0.880184	0.960366	0.953571
Cylindrospermopsis raciborskii CS-505	B1-11212112212	R-121222212	0.402342	81.4987			0.951658	0.957213	0.877193	0.86692	0.959584	0.951321
Nostoc azollae-0708	B1-1121211222	R-12122222	0.383737	42.9828			0.948916	0.9653	0.905444	0.897833	0.964324	0.946429
Gloeocapsa PCC 7428	B1-221	R-12211	0.432694	164.843			0.837711	0.821457	0.676006	0.697518	0.818803	0.838929
Chroococcidiopsis thermalis PCC 7203	B1-222	R-12212	0.444747	161.294			0.717423	0.635223	0.550658	0.556622	0.630762	0.710011
Microcoleus PCC 7113	B3-2	R-1222	0.462133	65.5102			0.883554	0.915166	0.827951	0.828406	0.91393	0.889493
Crinalium epipsammum PCC 9333	B4-1	R-211	0.401626	154.373			0.966195	0.958428	0.896226	0.900543	0.954545	0.967685
Oscillatoriales cyanobacterium JSC-12	B4-1x	R-212	0.474716	98.929			0.872072	0.892097	0.7728	0.774603	0.888452	0.877056
Chamaesiphon minutus PCC 6605	B4-2	R-22	0.456701	42.8024	50.6202		0.304111	0.220456	0.185783	0.184283	0.217874	0.299847
Prochlorococcus marinus NATL2a	C1-2111111	S-1111111111	0.35123	0.703183			0.926148	0.914153	0.660551	0.699187	0.918322	0.91974
Prochlorococcus marinus NATL1a	C1-2111112	S-1111111112	0.349793	0.531836			0.902585	0.896186	0.631579	0.642336	0.896406	0.896842
Prochlorococcus marinus SS120	C1-211122	S-111111112111	0.364421	0.463547			0.914081	0.900277	0.660378	0.612904	0.906494	0.915094
Prochlorococcus marinus MED4	C1-21111211	S-111111112112	0.307992	0.377751			0.925764	0.937269	0.653062	0.645834	0.939286	0.925439
Prochlorococcus marinus MIT9515	C1-21111212	S-11111111212	0.307942	0.73562			0.918288	0.921642	0.571429	0.611112	0.921933	0.9125
Prochlorococcus marinus AS9601	C1-2111122111	S-11111111221	0.313215	0.688472			0.929134	0.92562	0.59091	0.653847	0.934066	0.928571
Prochlorococcus marinus MIT9301	C1-2111122112	S-111111112221	0.313399	0.698113			0.912727	0.909775	0.489363	0.489363	0.913357	0.898734
Prochlorococcus marinus MIT9312	C1-21111222	S-111111112222	0.312105	0.684912			0.942308	0.938776	0.594596	0.680852	0.938272	0.932735
Prochlorococcus marinus MIT9211	C1-211121	S-11111112	0.396825	1.07812			0.86039	0.821946	0.644628	0.670498	0.833333	0.867488
Prochlorococcus marinus MIT9313	C1-21121	S-1111112	0.507398	2.41051			0.780096	0.728892	0.495706	0.547855	0.698016	0.792947
Prochlorococcus marinus MIT9303	C1-21122	S-111112	0.500076	2.5391			0.796668	0.724069	0.539401	0.535794	0.734824	0.802944
Synechococcus WH8102	C1-212111	S-11112111111	0.592176	2.2787			0.758722	0.586592	0.567504	0.584503	0.571759	0.762668
Synechococcus BL107	C1-212121	S-1111211111121	0.54205	3.117			0.739005	0.65564	0.595284	0.590587	0.653195	0.735085
Synechococcus CC9902	C1-212122	S-1111211111122	0.597981	3.10932			0.733915	0.652575	0.582954	0.590415	0.657403	0.732582
Synechococcus CC9605	C1-2121121	S-11112111112	0.541645	2.14673			0.762273	0.591801	0.586066	0.578162	0.590145	0.770231
Synechococcus RS9916	C1-212221	S-11112111121	0.643252	2.80801			0.746234	0.565583	0.564117	0.561404	0.611723	0.736663
Synechococcus RS9917	C1-212222	S-11112111122	0.411368	4.85516			0.706553	0.431463	0.485429	0.476936	0.422969	0.710199
Synechococcus RCC307	C1-1	S-111121112	0.608435	2.79574	11.4691		0.769341	0.644068	0.546479	0.56875	0.636569	0.766779
Synechococcus CC9311	C1-2122121	S-11112112	0.342759	3.44298			0.75389	0.68285	0.574061	0.568557	0.671045	0.767774
Synechococcus WH7805	C1-2122111	S-11112121	0.554378	2.89524			0.740494	0.585106	0.562734	0.56015	0.595556	0.738088
Synechococcus WH7803	C1-2122112	S-11112122	0.60236	3.66577			0.748426	0.561018	0.545509	0.56051	0.578801	0.743147
Synechococcus WH5701	C1-221	S-11112211	0.660416	3.24588			0.71515	0.390408	0.495835	0.49423	0.388648	0.714639
Cyanobium gracile PCC 6307	C1-22221	S-11112212	0.687072	2.49818			0.725668	0.439014	0.569158	0.587435	0.442207	0.722501
Paulinella chromatophora chromatophore	C1-2222x	S-1111222	0.379874	1.73483			0.835749	0.832512	0.592815	0.645833	0.808451	0.841492
Synechococcus elongatus PCC 7942	C2-1	S-11121	0.594126	121.37			0.672465	0.546154	0.530504	0.536164	0.560576	0.667543
Synechococcus elongatus PCC 6301	C2-2	S-11122	0.554843	120.802			0.663717	0.554536	0.536094	0.528078	0.545265	0.673637
Prochlorothrix hollandica PCC 9006	C22-1	S-112	0.541926	34.2236			0.365825	0.296289	0.124018	0.124221	0.29301	0.385052
Thermosynechococcus elongatus BP1	E-111	S-1211	0.539179	69.6305			0.901489	0.916828	0.813853	0.797647	0.908608	0.904762
Thermosynechococcus NK55a	E-112x	S-1212	0.538072	69.6214			0.90375	0.915663	0.823799	0.821759	0.912698	0.910152
Cyanothece PCC 7425	E-12	S-1221	0.506484	38.428			0.485834	0.352213	0.222004	0.226066	0.345056	0.491349
Acaryochloris marina MBIC11017	E-21	S-1222	0.469559	24.1813			0.853643	0.851796	0.693634	0.697512	0.851224	0.852679
Pseudanabaena PCC 7367	F-2	S-2	0.462239	110.747	11.5284		0.383625	0.255143	0.0797659	0.0752814	0.243886	0.386784
Leptolyngbya PCC 6406	C3-1	T-11	0.551053	41.9698			0.836635	0.831903	0.649254	0.645283	0.834098	0.834682
Leptolyngbya Heron Island J	C3-1x	T-12	0.480491	36.6371			0.823415	0.835641	0.682456	0.690994	0.835155	0.820303
Geitlerinema PCC 7407	D-1	T-2	0.584631	95.1177			0.786725	0.656729	0.63878	0.620769	0.663145	0.781555
Synechococcus PCC 7336	G-21	U-1	0.575433	81.6574			0.571082	0.546995	0.558394	0.550889	0.564005	0.569476
Synechococcus os type A prime	G-11	V-1	0.602373	0.774268	39.3028		0.912467	0.871969	0.849487	0.853982	0.876056	0.913329
Synechococcus os type B prime	G-12	V-2	0.584503	0.695712	50.0303		0.922318	0.897727	0.867508	0.865528	0.894737	0.922604
Gloeobacter violaceus PCC 7421	H-1	W-1	0.619979	2.13058			0.700711	0.571296	0.719507	0.711706	0.563756	0.696659
Gloeobacter kilaueensis JS1	H-1x	W-2	0.605368	3.40724			0.68463	0.430406	0.583396	0.584333	0.434328	0.675968

## Sheet: TGATCA
Organism	Shih	ML	GC%	HIP1	Other	T	G	A	T	C	A
Trichodesmium erythraeum IMS101	A-111	P-111	0.341434	139.794		0.576666	0.86818	0.733044	0.735978	0.868479	0.577692
Lyngbya PCC 8106	A-1121	P-1121	0.411069	65.9113		0.643375	0.737929	0.626164	0.621161	0.731674	0.637528
Arthrospira platensis NIES-39	A-112212	P-1122	0.436504	131.914		0.573842	0.846009	0.735876	0.736625	0.847708	0.567711
Oscillatoria nigro-viridis PCC 7112	A-1211	P-121	0.457845	59.5406	11.6895	0.881246	0.956899	0.935497	0.934765	0.957705	0.879367
Planktothrix rubescens niva-cya 407	A-1212x	P-122	0.386887	102.254		0.603907	0.744005	0.600555	0.594714	0.74892	0.600872
Oscillatoria acuminata PCC 6304	A-22	P-2	0.476122	103.634		0.753696	0.872246	0.84176	0.845137	0.874695	0.753079
Dactylococcopsis salina PCC 8305	B2-111	Q-1111111	0.424384	56.2473	22.6833	0.630307	0.720563	0.605918	0.593391	0.725974	0.633657
Halothece PCC 7418	B2-112	Q-1111112	0.429225	89.1526		0.686736	0.758363	0.679766	0.674319	0.757948	0.681113
Microcystis aeruginosa NIES843	B2-2112211	Q-111112	0.423306	41.6975		0.68106	0.818263	0.677491	0.670213	0.816535	0.680662
Pleurocapsa PCC 7327	B2-21121	Q-111121	0.451933	123.843		0.911696	0.972504	0.951469	0.951469	0.973132	0.907617
Cyanothece PCC 7822	B2-2112221	Q-1111221	0.398958	19.452	3.04843	0.673414	0.809293	0.701064	0.70582	0.806544	0.670755
Cyanothece PCC 7424	B2-2112222	Q-1111222	0.385098	78.7069		0.725555	0.859183	0.749407	0.75072	0.858228	0.725159
Epithemia turgida etsb endosymbiont	B2-21111x	Q-111211	0.334135	15.2933		0.678157	0.838838	0.684433	0.680802	0.835507	0.664594
Candidatus atelocyanobacterium thalassa	B2-2111111	Q-1112121	0.311168	15.2313		0.686174	0.858603	0.697248	0.686174	0.86112	0.686861
Cyanothece CCY0110	B2-211111211	Q-11121211	0.366935	125.201		0.671541	0.829973	0.693237	0.689939	0.833083	0.665377
Cyanothece ATCC 51142	B2-211111212x	Q-11121212	0.379419	105.643		0.669942	0.817149	0.674804	0.680804	0.817581	0.669942
Crocosphaera watsonii WH8501	B2-211111222	Q-11121222	0.370982	117.216		0.67421	0.856394	0.733945	0.729923	0.856147	0.677206
Cyanothece PCC 8802	B2-2111121	Q-111221	0.398179	112.394		0.666203	0.791026	0.66759	0.659578	0.796822	0.663605
Cyanothece PCC 8801	B2-2111122	Q-111222	0.397098	110.972		0.664264	0.79436	0.663215	0.669196	0.797909	0.664593
Stanieria cyanosphaera PCC 7437	B2-2221	Q-112	0.524473	227.863		0.740587	0.895999	0.810112	0.810592	0.898911	0.739986
Synechocystis PCC 6803	B2-21112	Q-121	0.473596	70.0597		0.658069	0.738788	0.743788	0.748918	0.740444	0.661725
Synechococcus PCC 7002	B2-22111	Q-1221	0.49187	114.695		0.720007	0.659778	0.646584	0.656264	0.6716	0.724244
Leptolyngbya PCC 7376	B2-22112	Q-1222	0.438674	144.043		0.719529	0.788737	0.731064	0.73087	0.778242	0.712894
Prochloron didemni P4-Papua New Guinea	B2-2212X	Q-21	0.418982	68.6586		0.816116	0.944909	0.928385	0.925445	0.944375	0.822532
Cyanobacterium stanieri PCC 7202	B2-22121	Q-2211	0.386647	132.89		0.564149	0.815529	0.627752	0.633291	0.812023	0.576833
Geminocystis herdmanii PCC 6308	B2-221221	Q-2212	0.537075	44.4047	69.9455	0.578021	0.850294	0.597617	0.595355	0.847998	0.584901
Cyanobacterium aponinum PCC 10605	B2-221222	Q-222	0.349314	177.127		0.588255	0.875341	0.691885	0.682776	0.876229	0.60296
Oscillatoria PCC 10802	A-21	R-11	0.539447	5.06041	4.52733	0.801267	0.866305	0.882493	0.875226	0.865654	0.800578
Mastigocladopsis repens PCC 10914	B1-11112	R-1211	0.435719	55.4443		0.68303	0.879002	0.859368	0.857143	0.87666	0.69664
Calothrix PCC 7103	B1-11121	R-1212111	0.385345	2.92987	30.0113	0.664603	0.965517	0.93867	0.937184	0.965389	0.658061
Calothrix PCC 6303	B1-11122	R-1212112	0.397969	121.816		0.667454	0.869378	0.762977	0.755334	0.869367	0.661047
Chlorogloeopsis fritschii PCC 6912	B1-12x	R-12121211	0.414717	134.019		0.837472	0.935937	0.900902	0.899985	0.936044	0.83461
Fischerella thermalis PCC 7521	B1-12y	R-12121212	0.410156	137.377		0.641178	0.803559	0.733283	0.740308	0.803933	0.643365
Rivularia PCC 7116	B1-12	R-12121221	0.375316	60.1521		0.876777	0.987979	0.969406	0.970092	0.988369	0.872861
Richelia intracellularis HH01	B1-12z	R-12121222	0.337117	3.67114		0.62943	0.875883	0.726852	0.720379	0.873835	0.633052
Nostoc PCC 7524	B1-1121111	R-121221111111	0.415311	122.109		0.581601	0.81353	0.709912	0.705745	0.810752	0.580829
Anabaena PCC 7120	B1-11211121	R-12122111111211	0.412683	118.642		0.630974	0.865952	0.794373	0.795298	0.866618	0.614279
Anabaena variabilis ATCC 29413	B1-11211122	R-12122111111212	0.414098	118.913		0.636042	0.870484	0.804998	0.802883	0.869664	0.630471
Nostoc PCC 7107	B1-112112	R-1212211111122	0.403578	152.855		0.595745	0.847712	0.761965	0.760414	0.850354	0.588364
Microchaete PCC 7126	B1-11212212	R-12122111112	0.422068	120.731		0.62391	0.841975	0.79387	0.793434	0.847196	0.627351
Nostoc punctiforme ATCC 29133	B1-1121222	R-1212211112	0.413545	123.987		0.833371	0.944031	0.916667	0.915792	0.944385	0.827545
Cylindrospermum stagnale PCC 7417	B1-11212111	R-121221112	0.422016	93.3648		0.618967	0.825107	0.745216	0.74804	0.821145	0.626308
Anabaena PCC 7108	B1-1121211212	R-12122112	0.387742	90.3983		0.577065	0.828686	0.706168	0.703073	0.825815	0.588482
Nodularia spumigena CCY9414	B1-1121212	R-1212212111	0.412658	112.187		0.596695	0.832601	0.759285	0.765395	0.82955	0.581906
Scytonema hofmanni UTEX 2349	B1-1121212y	R-1212212112	0.362232	155.775		0.771053	0.933339	0.885409	0.887903	0.93374	0.774156
Anabaena 90	B1-112121x	R-121221212	0.380965	84.1866		0.552538	0.816625	0.66113	0.662252	0.818321	0.563481
Calothrix PCC 7507	B1-11212211	R-12122122	0.422472	124.09		0.658639	0.851092	0.778329	0.77896	0.847233	0.661871
Anabaena cylindrica PCC 7122	B1-1121211211	R-1212221	0.387906	105.46		0.593572	0.83371	0.715667	0.715976	0.832431	0.590885
Raphidiopsis brookii d9	B1-11212112211	R-121222211	0.400568	73.7205		0.638075	0.817639	0.748668	0.748242	0.819258	0.63757
Cylindrospermopsis raciborskii CS-505	B1-11212112212	R-121222212	0.402342	81.4987		0.653536	0.840042	0.779852	0.777108	0.843037	0.662791
Nostoc azollae-0708	B1-1121211222	R-12122222	0.383737	42.9828		0.619982	0.841008	0.72603	0.734596	0.841037	0.624782
Gloeocapsa PCC 7428	B1-221	R-12211	0.432694	164.843		0.847275	0.923088	0.877255	0.880229	0.924398	0.84816
Chroococcidiopsis thermalis PCC 7203	B1-222	R-12212	0.444747	161.294		0.898775	0.969171	0.945496	0.946267	0.968959	0.896795
Microcoleus PCC 7113	B3-2	R-1222	0.462133	65.5102		0.695983	0.826395	0.814411	0.812939	0.825522	0.687723
Crinalium epipsammum PCC 9333	B4-1	R-211	0.401626	154.373		0.727096	0.851125	0.779852	0.785638	0.852765	0.725816
Oscillatoriales cyanobacterium JSC-12	B4-1x	R-212	0.474716	98.929		0.704006	0.736856	0.749105	0.757489	0.733403	0.704006
Chamaesiphon minutus PCC 6605	B4-2	R-22	0.456701	42.8024	50.6202	0.909774	0.978758	0.948535	0.951252	0.978437	0.908918
Prochlorococcus marinus NATL2a	C1-2111111	S-1111111111	0.35123	0.703183		0.656904	0.775845	0.621803	0.621644	0.781015	0.66826
Prochlorococcus marinus NATL1a	C1-2111112	S-1111111112	0.349793	0.531836		0.657316	0.775738	0.623019	0.620168	0.781061	0.66193
Prochlorococcus marinus SS120	C1-211122	S-111111112111	0.364421	0.463547		0.664042	0.777262	0.660628	0.654054	0.771633	0.666087
Prochlorococcus marinus MED4	C1-21111211	S-111111112112	0.307992	0.377751		0.667774	0.840722	0.625	0.624296	0.83871	0.662732
Prochlorococcus marinus MIT9515	C1-21111212	S-11111111212	0.307942	0.73562		0.668239	0.840915	0.614729	0.627208	0.835113	0.66258
Prochlorococcus marinus AS9601	C1-2111122111	S-11111111221	0.313215	0.688472		0.668076	0.826087	0.625522	0.614724	0.831455	0.668776
Prochlorococcus marinus MIT9301	C1-2111122112	S-111111112221	0.313399	0.698113		0.672806	0.831332	0.629902	0.623441	0.832222	0.669945
Prochlorococcus marinus MIT9312	C1-21111222	S-111111112222	0.312105	0.684912		0.661417	0.828092	0.624782	0.609564	0.826239	0.668721
Prochlorococcus marinus MIT9211	C1-211121	S-11111112	0.396825	1.07812		0.669269	0.750774	0.659763	0.655394	0.754123	0.686404
Prochlorococcus marinus MIT9313	C1-21121	S-1111112	0.507398	2.41051		0.655155	0.55871	0.589718	0.59126	0.518855	0.657668
Prochlorococcus marinus MIT9303	C1-21122	S-111112	0.500076	2.5391		0.644841	0.547628	0.587192	0.582825	0.557689	0.651647
Synechococcus WH8102	C1-212111	S-11112111111	0.592176	2.2787		0.701632	0.397543	0.602412	0.605222	0.402555	0.706252
Synechococcus BL107	C1-212121	S-1111211111121	0.54205	3.117		0.700129	0.506391	0.613533	0.613349	0.498299	0.694826
Synechococcus CC9902	C1-212122	S-1111211111122	0.597981	3.10932		0.699388	0.503947	0.616642	0.612099	0.518689	0.69933
Synechococcus CC9605	C1-2121121	S-11112111112	0.541645	2.14673		0.707728	0.417257	0.625693	0.624727	0.416178	0.716789
Synechococcus RS9916	C1-212221	S-11112111121	0.643252	2.80801		0.693665	0.38662	0.621921	0.616929	0.382327	0.693132
Synechococcus RS9917	C1-212222	S-11112111122	0.411368	4.85516		0.742527	0.325027	0.613284	0.623717	0.313625	0.743657
Synechococcus RCC307	C1-1	S-111121112	0.608435	2.79574	11.4691	0.681319	0.386403	0.62063	0.6171	0.382979	0.683089
Synechococcus CC9311	C1-2122121	S-11112112	0.342759	3.44298		0.689693	0.536327	0.611658	0.616492	0.531703	0.687183
Synechococcus WH7805	C1-2122111	S-11112121	0.554378	2.89524		0.688646	0.434815	0.584216	0.593571	0.423213	0.687148
Synechococcus WH7803	C1-2122112	S-11112122	0.60236	3.66577		0.695527	0.367773	0.608185	0.599319	0.378571	0.703994
Synechococcus WH5701	C1-221	S-11112211	0.660416	3.24588		0.744836	0.314374	0.619549	0.623509	0.306243	0.740339
Cyanobium gracile PCC 6307	C1-22221	S-11112212	0.687072	2.49818		0.768353	0.338423	0.660813	0.660597	0.325904	0.762131
Paulinella chromatophora chromatophore	C1-2222x	S-1111222	0.379874	1.73483		0.673583	0.792491	0.660017	0.647718	0.779634	0.6728
Synechococcus elongatus PCC 7942	C2-1	S-11121	0.594126	121.37		0.715836	0.536223	0.660412	0.666818	0.538268	0.710563
Synechococcus elongatus PCC 6301	C2-2	S-11122	0.554843	120.802		0.709377	0.538511	0.667975	0.65908	0.533874	0.716203
Prochlorothrix hollandica PCC 9006	C22-1	S-112	0.541926	34.2236		0.750187	0.64005	0.682746	0.675877	0.630979	0.744035
Thermosynechococcus elongatus BP1	E-111	S-1211	0.539179	69.6305		0.711295	0.617379	0.720608	0.724501	0.627709	0.71185
Thermosynechococcus NK55a	E-112x	S-1212	0.538072	69.6214		0.716544	0.621275	0.725608	0.720646	0.633977	0.709743
Cyanothece PCC 7425	E-12	S-1221	0.506484	38.428		0.698639	0.575243	0.677143	0.679009	0.57425	0.698473
Acaryochloris marina MBIC11017	E-21	S-1222	0.469559	24.1813		0.685106	0.702092	0.7065	0.698137	0.698347	0.687057
Pseudanabaena PCC 7367	F-2	S-2	0.462239	110.747	11.5284	0.727606	0.692986	0.658085	0.647925	0.693807	0.725731
Leptolyngbya PCC 6406	C3-1	T-11	0.551053	41.9698		0.714117	0.62284	0.698481	0.704281	0.60836	0.717703
Leptolyngbya Heron Island J	C3-1x	T-12	0.480491	36.6371		0.669911	0.724466	0.73483	0.732212	0.724085	0.670104
Geitlerinema PCC 7407	D-1	T-2	0.584631	95.1177		0.71976	0.541413	0.680678	0.680469	0.546401	0.720758
Synechococcus PCC 7336	G-21	U-1	0.575433	81.6574		0.882801	0.937091	0.940171	0.940655	0.938202	0.880528
Synechococcus os type A prime	G-11	V-1	0.602373	0.774268	39.3028	0.815426	0.572146	0.794269	0.790862	0.586165	0.814169
Synechococcus os type B prime	G-12	V-2	0.584503	0.695712	50.0303	0.786735	0.536188	0.76927	0.773969	0.533811	0.784921
Gloeobacter violaceus PCC 7421	H-1	W-1	0.619979	2.13058		0.790794	0.572031	0.788211	0.790578	0.557574	0.793874
Gloeobacter kilaueensis JS1	H-1x	W-2	0.605368	3.40724		0.833383	0.61958	0.79842	0.801169	0.609798	0.837246
